# Supplementary material
Source: publisher site journal article supplement (https://www.spandidos-publications.com/3872/downloadSupplementary)
Supplement: Supplementary file 2 [file downloadSupplementary]

## Sheet: VURvsNon_VUR
Table SII. Raw data of the differential proteins identified by mass spectrometry analysis between the VUR group and the non-VUR groups.
Protein accession	Protein description	VUR/Non-VUR Ratio	Regulated Type	VUR/Non-VUR P-value	Gene name	MW (kDa)	Non-VUR1	Non-VUR2	Non-VUR3	Non-VUR4	Non-VUR5	VUR1	VUR3	VUR2	VUR4	VUR5	Subcellular localization	Biological Process	Cellular Component	Molecular Function	KEGG KO No.	KEGG Gene	KEGG pathway	IPR ID	Domain description
P80723	Brain acid soluble protein 1 OS=Homo sapiens OX=9606 GN=BASP1 PE=1 SV=2	0.209	Down	0.0085214	BASP1	22.693	2.123	11.251	2.378	2.395	2.162	2.141	0.615	0.591	0.505	0.401	nucleus	GO:0022414 reproductive process; GO:0035282 segmentation; GO:0007420 brain development; GO:0045927 positive regulation of growth; GO:0048857 neural nucleus development; GO:0021762 substantia nigra development; GO:0051240 positive regulation of multicellular organismal process; GO:0044702 single organism reproductive process; GO:0010558 negative regulation of macromolecule biosynthetic process; GO…	GO:0016020 membrane; GO:0044421 extracellular region part; GO:0071944 cell periphery; GO:0030054 cell junction; GO:0005737 cytoplasm; GO:0031982 vesicle; GO:0030426 growth cone; GO:0044424 intracellular part; GO:0016604 nuclear body; GO:0005623 cell; GO:0044422 organelle part; GO:0043228 non-membrane-bounded organelle; GO:0031974 membrane-enclosed lumen; GO:0005856 cytoskeleton; GO:0070062 extrac…	GO:0097159 organic cyclic compound binding; GO:0000975 regulatory region DNA binding; GO:1901363 heterocyclic compound binding; GO:0003677 DNA binding; GO:0001067 regulatory region nucleic acid binding; GO:0003714 transcription corepressor activity; GO:0044212 transcription regulatory region DNA binding; GO:0005488 binding; GO:0003676 nucleic acid binding; GO:0000989 transcription factor activity…	K17272	BASP1; brain acid soluble protein 1
Q8N4P2	Tetratricopeptide repeat protein 30B OS=Homo sapiens OX=9606 GN=TTC30B PE=1 SV=2	0.542	Down	0.0031397	TTC30B	76.098	1.535	1.402	1.325			0.724	0.906	0.679			cytoplasm	GO:0098840 protein transport along microtubule; GO:0044085 cellular component biogenesis; GO:0046907 intracellular transport; GO:0016043 cellular component organization; GO:0060271 cilium assembly; GO:0044699 single-organism process; GO:0015031 protein transport; GO:0030705 cytoskeleton-dependent intracellular transport; GO:0099111 microtubule-based transport; GO:0044782 cilium organization; GO:0…	GO:0005929 cilium; GO:0043226 organelle; GO:0030992 intraciliary transport particle B; GO:0042995 cell projection; GO:0044441 ciliary part; GO:0044464 cell part; GO:0032991 macromolecular complex; GO:0097542 ciliary tip; GO:0044463 cell projection part; GO:0030990 intraciliary transport particle; GO:0043234 protein complex; GO:0005623 cell; GO:0044422 organelle part;	GO:0005515 protein binding; GO:0005488 binding;	K19683	TTC30, DYF1; tetratricopeptide repeat protein 30		IPR011990; IPR013026;	Tetratricopeptide-like helical domain; Tetratricopeptide repeat-containing domain;
P07741	Adenine phosphoribosyltransferase OS=Homo sapiens OX=9606 GN=APRT PE=1 SV=2	0.218	Down	0.0088989	APRT	19.608	3.095	1.257	2.424			0.612	0.504	0.358			cytoplasm	GO:0046083 adenine metabolic process; GO:0009116 nucleoside metabolic process; GO:0065008 regulation of biological quality; GO:0045321 leukocyte activation; GO:0048732 gland development; GO:0009163 nucleoside biosynthetic process; GO:0046129 purine ribonucleoside biosynthetic process; GO:0043174 nucleoside salvage; GO:0007625 grooming behavior; GO:0044237 cellular metabolic process; GO:0007610 be…	GO:0034774 secretory granule lumen; GO:0044421 extracellular region part; GO:0031410 cytoplasmic vesicle; GO:0031982 vesicle; GO:0005737 cytoplasm; GO:0044433 cytoplasmic vesicle part; GO:0044424 intracellular part; GO:0005623 cell; GO:0044422 organelle part; GO:0070062 extracellular exosome; GO:0031974 membrane-enclosed lumen; GO:0005654 nucleoplasm; GO:0031983 vesicle lumen; GO:0070013 intracel…	GO:0016763 transferase activity, transferring pentosyl groups; GO:1901265 nucleoside phosphate binding; GO:0001882 nucleoside binding; GO:0043167 ion binding; GO:0000166 nucleotide binding; GO:0002055 adenine binding; GO:1901363 heterocyclic compound binding; GO:0097159 organic cyclic compound binding; GO:0002054 nucleobase binding; GO:0032549 ribonucleoside binding; GO:0097367 carbohydrate deriv…	K00759	APRT, apt; adenine phosphoribosyltransferase [EC:2.4.2.7]	hsa00230 Purine metabolism; hsa01100 Metabolic pathways	IPR000836; IPR029057;	Phosphoribosyltransferase domain; Phosphoribosyltransferase-like;
Q16181	Septin-7 OS=Homo sapiens OX=9606 GN=SEPTIN7 PE=1 SV=2	0.383	Down	0.025139	SEPTIN7	50.679	1.556	2.305	1.864	1.537	2.248	1.725	0.373	0.255	0.647	0.642	cytoplasm	GO:0044085 cellular component biogenesis; GO:0065008 regulation of biological quality; GO:0060491 regulation of cell projection assembly; GO:0022414 reproductive process; GO:0048869 cellular developmental process; GO:0007067 mitotic nuclear division; GO:0060271 cilium assembly; GO:0044699 single-organism process; GO:1902115 regulation of organelle assembly; GO:0044782 cilium organization; GO:0051…	GO:0044421 extracellular region part; GO:0099568 cytoplasmic region; GO:0005737 cytoplasm; GO:0032991 macromolecular complex; GO:0097729 9+2 motile cilium; GO:0005623 cell; GO:0032155 cell division site part; GO:0044422 organelle part; GO:0043228 non-membrane-bounded organelle; GO:0070062 extracellular exosome; GO:0000793 condensed chromosome; GO:0005622 intracellular; GO:0043227 membrane-bounded…	GO:1901265 nucleoside phosphate binding; GO:0001882 nucleoside binding; GO:0043167 ion binding; GO:0005515 protein binding; GO:0000166 nucleotide binding; GO:0097159 organic cyclic compound binding; GO:1901363 heterocyclic compound binding; GO:0050839 cell adhesion molecule binding; GO:0032549 ribonucleoside binding; GO:0097367 carbohydrate derivative binding; GO:0042802 identical protein binding…	K16944	SEPT7, CDC3; septin 7	hsa05131 Shigellosis	IPR027417; IPR030379;	P-loop containing nucleoside triphosphate hydrolase; Septin-type guanine nucleotide-binding (G) domain;
P17174	"Aspartate aminotransferase, cytoplasmic OS=Homo sapiens OX=9606 GN=GOT1 PE=1 SV=3"	0.548	Down	0.044458	GOT1	46.247	1.613	1.39	1.02	0.632	2.055	0.522	0.988	0.822	0.652	0.691	cytoplasm	GO:0044700 single organism signaling; GO:0019550 glutamate catabolic process to aspartate; GO:1901606 alpha-amino acid catabolic process; GO:0065008 regulation of biological quality; GO:0019319 hexose biosynthetic process; GO:0016053 organic acid biosynthetic process; GO:0007166 cell surface receptor signaling pathway; GO:0006066 alcohol metabolic process; GO:0044699 single-organism process; GO:0…	GO:0044421 extracellular region part; GO:0031982 vesicle; GO:0005737 cytoplasm; GO:0044424 intracellular part; GO:0005623 cell; GO:0044422 organelle part; GO:0043679 axon terminus; GO:0031974 membrane-enclosed lumen; GO:0070062 extracellular exosome; GO:0005654 nucleoplasm; GO:0070013 intracellular organelle lumen; GO:0005622 intracellular; GO:0044464 cell part; GO:0098793 presynapse; GO:0005764 …	GO:0016769 transferase activity, transferring nitrogenous groups; GO:0047801 L-cysteine:2-oxoglutarate aminotransferase activity; GO:0043167 ion binding; GO:0043177 organic acid binding; GO:0016829 lyase activity; GO:0048037 cofactor binding; GO:0030170 pyridoxal phosphate binding; GO:1901363 heterocyclic compound binding; GO:0097159 organic cyclic compound binding; GO:0031406 carboxylic acid bin…	K14454	GOT1; aspartate aminotransferase, cytoplasmic [EC:2.6.1.1]	hsa00220 Arginine biosynthesis; hsa00250 Alanine, aspartate and glutamate metabolism; hsa00270 Cysteine and methionine metabolism; hsa00330 Arginine and proline metabolism; hsa00350 Tyrosine metabolism; hsa00360 Phenylalanine metabolism; hsa00400 Phenylalanine, tyrosine and tryptophan biosynthesis; hsa01100 Metabolic pathways; hsa01200 Carbon metabolism; hsa01210 2-Oxocarboxylic acid metabolism; …	IPR004839; IPR015424; IPR015421;	Aminotransferase, class I/classII; Pyridoxal phosphate-dependent transferase; Pyridoxal phosphate-dependent transferase, major region, subdomain 1;
Q9UNM6	26S proteasome non-ATPase regulatory subunit 13 OS=Homo sapiens OX=9606 GN=PSMD13 PE=1 SV=2	1.781	Up	0.027458	PSMD13	42.945	0.856	0.505	0.568	0.601	0.345	0.681	0.823	1.549	0.81	1.257	cytoplasm	GO:0044700 single organism signaling; GO:0044085 cellular component biogenesis; GO:0022414 reproductive process; GO:0010608 posttranscriptional regulation of gene expression; GO:0051443 positive regulation of ubiquitin-protein transferase activity; GO:0031347 regulation of defense response; GO:0010564 regulation of cell cycle process; GO:0044237 cellular metabolic process; GO:1903364 positive reg…	GO:0016020 membrane; GO:0034774 secretory granule lumen; GO:0044421 extracellular region part; GO:0031410 cytoplasmic vesicle; GO:0005838 proteasome regulatory particle; GO:0031982 vesicle; GO:0005737 cytoplasm; GO:0044433 cytoplasmic vesicle part; GO:0032991 macromolecular complex; GO:0044424 intracellular part; GO:0005623 cell; GO:1904813 ficolin-1-rich granule lumen; GO:0044422 organelle part;…	GO:0005515 protein binding; GO:0005198 structural molecule activity; GO:0005488 binding;	K03039	PSMD13, RPN9; 26S proteasome regulatory subunit N9	hsa03050 Proteasome; hsa05169 Epstein-Barr virus infection	IPR011991; IPR000717;	Winged helix-turn-helix DNA-binding domain; Proteasome component (PCI) domain;
P02452	Collagen alpha-1(I) chain OS=Homo sapiens OX=9606 GN=COL1A1 PE=1 SV=5	5.641	Up	0.00023705	COL1A1	138.94	0.463	0.412	0.442	0.44	0.396	2.43	3.534	2.238	2.409	1.535	extracellular	GO:0044700 single organism signaling; GO:0044085 cellular component biogenesis; GO:0030199 collagen fibril organization; GO:0043009 chordate embryonic development; GO:0009891 positive regulation of biosynthetic process; GO:0046683 response to organophosphorus; GO:0008152 metabolic process; GO:0065003 macromolecular complex assembly; GO:0060343 trabecula formation; GO:0090263 positive regulation o…	GO:0005584 collagen type I trimer; GO:0005783 endoplasmic reticulum; GO:0005615 extracellular space; GO:0098643 banded collagen fibril; GO:0044421 extracellular region part; GO:0031410 cytoplasmic vesicle; GO:0031982 vesicle; GO:0005737 cytoplasm; GO:0005583 fibrillar collagen trimer; GO:0032991 macromolecular complex; GO:0099512 supramolecular fiber; GO:0044424 intracellular part; GO:0099080 sup…	GO:0005201 extracellular matrix structural constituent; GO:0042802 identical protein binding; GO:0019838 growth factor binding; GO:0005488 binding; GO:0043167 ion binding; GO:0048407 platelet-derived growth factor binding; GO:0046872 metal ion binding; GO:0043169 cation binding; GO:0005515 protein binding; GO:0005198 structural molecule activity;	K06236	COL1A; collagen, type I, alpha	hsa04151 PI3K-Akt signaling pathway; hsa04510 Focal adhesion; hsa04512 ECM-receptor interaction; hsa04611 Platelet activation; hsa04926 Relaxin signaling pathway; hsa04933 AGE-RAGE signaling pathway in diabetic complications; hsa04974 Protein digestion and absorption; hsa05146 Amoebiasis; hsa05165 Human papillomavirus infection; hsa05205 Proteoglycans in cancer	IPR001007; IPR000885;	VWFC domain; Fibrillar collagen, C-terminal;
Q8NHW5	60S acidic ribosomal protein P0-like OS=Homo sapiens OX=9606 GN=RPLP0P6 PE=5 SV=1	1.78	Up	0.035745	RPLP0P6	34.364				0.334	0.307				0.512	0.629	cytoplasm	GO:0044085 cellular component biogenesis; GO:0042254 ribosome biogenesis; GO:0022613 ribonucleoprotein complex biogenesis; GO:0071840 cellular component organization or biogenesis;	GO:0005840 ribosome; GO:0043226 organelle; GO:0043229 intracellular organelle; GO:0043232 intracellular non-membrane-bounded organelle; GO:0044464 cell part; GO:0005622 intracellular; GO:0005737 cytoplasm; GO:0032991 macromolecular complex; GO:0044424 intracellular part; GO:1990904 ribonucleoprotein complex; GO:0005623 cell; GO:0030529 intracellular ribonucleoprotein complex; GO:0044444 cytoplasm…		K02941	RP-LP0, RPLP0; large subunit ribosomal protein LP0	hsa03010 Ribosome
Q969X0	RILP-like protein 2 OS=Homo sapiens OX=9606 GN=RILPL2 PE=1 SV=1	0.558	Down	0.0131221	RILPL2	23.986	1.367	1.556	1.87			0.925	1.025	0.723			nucleus	GO:0044085 cellular component biogenesis; GO:1903445 protein transport from ciliary membrane to plasma membrane; GO:0046907 intracellular transport; GO:0016043 cellular component organization; GO:0010256 endomembrane system organization; GO:0048869 cellular developmental process; GO:0032989 cellular component morphogenesis; GO:0060271 cilium assembly; GO:0090002 establishment of protein localizat…	GO:0016020 membrane; GO:0044421 extracellular region part; GO:0031982 vesicle; GO:0005737 cytoplasm; GO:0044424 intracellular part; GO:0005623 cell; GO:0044422 organelle part; GO:0043228 non-membrane-bounded organelle; GO:0070062 extracellular exosome; GO:0005856 cytoskeleton; GO:0005815 microtubule organizing center; GO:0015630 microtubule cytoskeleton; GO:0044441 ciliary part; GO:0044464 cell p…	GO:0051959 dynein light intermediate chain binding; GO:0031267 small GTPase binding; GO:0005515 protein binding; GO:0042802 identical protein binding; GO:0051020 GTPase binding; GO:0005488 binding; GO:0019899 enzyme binding;
Q12929	Epidermal growth factor receptor kinase substrate 8 OS=Homo sapiens OX=9606 GN=EPS8 PE=1 SV=1	0.62	Down	0.049257	EPS8	91.88	0.942	0.973	2.009	1.259	1.928	1.144	0.678	1.051	0.834	0.701	nucleus	GO:0030833 regulation of actin filament polymerization; GO:0044700 single organism signaling; GO:0044085 cellular component biogenesis; GO:0065008 regulation of biological quality; GO:0051674 localization of cell; GO:0030835 negative regulation of actin filament depolymerization; GO:0007166 cell surface receptor signaling pathway; GO:0023051 regulation of signaling; GO:0051129 negative regulation…	GO:0016020 membrane; GO:0044421 extracellular region part; GO:0098862 cluster of actin-based cell projections; GO:0005903 brush border; GO:0005938 cell cortex; GO:0030054 cell junction; GO:0071944 cell periphery; GO:0032587 ruffle membrane; GO:0031982 vesicle; GO:0005737 cytoplasm; GO:0099568 cytoplasmic region; GO:0032991 macromolecular complex; GO:0031224 intrinsic component of membrane; GO:003…	GO:0031267 small GTPase binding; GO:0005070 SH3/SH2 adaptor activity; GO:0017048 Rho GTPase binding; GO:0008092 cytoskeletal protein binding; GO:0030674 protein binding, bridging; GO:0048365 Rac GTPase binding; GO:0035591 signaling adaptor activity; GO:0017016 Ras GTPase binding; GO:0005488 binding; GO:0003779 actin binding; GO:0060090 binding, bridging; GO:0005515 protein binding; GO:0051020 GTP…	K17277	EPS8; epidermal growth factor receptor kinase substrate 8		IPR013625; IPR001452; IPR011993; IPR006020; IPR033928;	Tensin/EPS8 phosphotyrosine-binding domain; SH3 domain; PH domain-like; PTB/PI domain; Epidermal growth factor receptor kinase substrate, phosphotyrosine-binding domain;
Q4KMP7	TBC1 domain family member 10B OS=Homo sapiens OX=9606 GN=TBC1D10B PE=1 SV=3	0.483	Down	0.028537	TBC1D10B	87.198	1.071	1.413	1.909	2.21	3.545	1.802	0.888	0.75	0.701	0.76	nucleus	GO:0044700 single organism signaling; GO:0050794 regulation of cellular process; GO:0060627 regulation of vesicle-mediated transport; GO:0046907 intracellular transport; GO:0044699 single-organism process; GO:0050896 response to stimulus; GO:0031338 regulation of vesicle fusion; GO:0015031 protein transport; GO:0051234 establishment of localization; GO:0090630 activation of GTPase activity; GO:00…	GO:0016020 membrane; GO:0071944 cell periphery; GO:0044464 cell part; GO:0005622 intracellular; GO:0005737 cytoplasm; GO:0012505 endomembrane system; GO:0044424 intracellular part; GO:0005623 cell; GO:0005829 cytosol; GO:0005886 plasma membrane; GO:0044444 cytoplasmic part;	GO:0031267 small GTPase binding; GO:0004114 3',5'-cyclic-nucleotide phosphodiesterase activity; GO:0004112 cyclic-nucleotide phosphodiesterase activity; GO:0060589 nucleoside-triphosphatase regulator activity; GO:0030695 GTPase regulator activity; GO:0016787 hydrolase activity; GO:0005515 protein binding; GO:0098772 molecular function regulator; GO:0017137 Rab GTPase binding; GO:0030234 enzyme re…	K19944	TBC1D10; TBC1 domain family member 10		IPR002073; IPR000195;	3'5'-cyclic nucleotide phosphodiesterase, catalytic domain; Rab-GTPase-TBC domain;
P98196	Probable phospholipid-transporting ATPase IH OS=Homo sapiens OX=9606 GN=ATP11A PE=1 SV=3	1.866	Up	0.028357	ATP11A	129.75	0.398	0.824	0.481	0.981	0.731	1.236	1.898	0.683	1.295	1.261	plasma membrane	GO:0016043 cellular component organization; GO:0065008 regulation of biological quality; GO:0045321 leukocyte activation; GO:0002283 neutrophil activation involved in immune response; GO:0002252 immune effector process; GO:0044699 single-organism process; GO:0045332 phospholipid translocation; GO:0097035 regulation of membrane lipid distribution; GO:0050896 response to stimulus; GO:0051234 establ…	GO:0016020 membrane; GO:0005783 endoplasmic reticulum; GO:0031090 organelle membrane; GO:0031410 cytoplasmic vesicle; GO:0071944 cell periphery; GO:0031982 vesicle; GO:0005737 cytoplasm; GO:0044433 cytoplasmic vesicle part; GO:0031224 intrinsic component of membrane; GO:0044424 intracellular part; GO:0005623 cell; GO:0044422 organelle part; GO:0005769 early endosome; GO:0055037 recycling endosome…	GO:1901265 nucleoside phosphate binding; GO:0005319 lipid transporter activity; GO:0016817 hydrolase activity, acting on acid anhydrides; GO:0022892 substrate-specific transporter activity; GO:0005515 protein binding; GO:0016787 hydrolase activity; GO:0016887 ATPase activity; GO:0097159 organic cyclic compound binding; GO:1901363 heterocyclic compound binding; GO:0016462 pyrophosphatase activity;…	K01530	E3.6.3.1; phospholipid-translocating ATPase [EC:3.6.3.1]		IPR032630; IPR023299; IPR008250; IPR032631; IPR023214;	P-type ATPase, C-terminal; P-type ATPase, cytoplasmic domain N; P-type ATPase, A domain; P-type ATPase, N-terminal; HAD-like domain;
P13498	Cytochrome b-245 light chain OS=Homo sapiens OX=9606 GN=CYBA PE=1 SV=3	4.157	Up	0.014877	CYBA	21.012	0.337	1.227	0.344	0.427	0.301	6.027	0.838	1.233	1.45	1.411	plasma membrane	GO:0044085 cellular component biogenesis; GO:0044700 single organism signaling; GO:1904385 cellular response to angiotensin; GO:0032680 regulation of tumor necrosis factor production; GO:0042593 glucose homeostasis; GO:0009891 positive regulation of biosynthetic process; GO:0070555 response to interleukin-1; GO:0031347 regulation of defense response; GO:0044237 cellular metabolic process; GO:0045…	GO:0016020 membrane; GO:0030425 dendrite; GO:0097038 perinuclear endoplasmic reticulum; GO:0031090 organelle membrane; GO:0005737 cytoplasm; GO:0044433 cytoplasmic vesicle part; GO:0043025 neuronal cell body; GO:0032991 macromolecular complex; GO:0005887 integral component of plasma membrane; GO:0005623 cell; GO:0044422 organelle part; GO:0043228 non-membrane-bounded organelle; GO:0098590 plasma …	GO:0016651 oxidoreductase activity, acting on NAD(P)H; GO:0046982 protein heterodimerization activity; GO:0043167 ion binding; GO:0046983 protein dimerization activity; GO:0005515 protein binding; GO:0017124 SH3 domain binding; GO:0016175 superoxide-generating NADPH oxidase activity; GO:0016491 oxidoreductase activity; GO:0009055 electron carrier activity; GO:1901363 heterocyclic compound binding…	K08009	CYBA, P22PHOX; cytochrome b-245, alpha polypeptide	hsa04145 Phagosome; hsa04380 Osteoclast differentiation; hsa04621 NOD-like receptor signaling pathway; hsa04670 Leukocyte transendothelial migration; hsa05140 Leishmaniasis; hsa05418 Fluid shear stress and atherosclerosis
Q01581	"Hydroxymethylglutaryl-CoA synthase, cytoplasmic OS=Homo sapiens OX=9606 GN=HMGCS1 PE=1 SV=2"	1.88	Up	0.03038	HMGCS1	57.293	0.855	0.548	0.786			1.596	1.031	1.489			cytoplasm	GO:0048732 gland development; GO:0022414 reproductive process; GO:0006066 alcohol metabolic process; GO:0007420 brain development; GO:0008584 male gonad development; GO:0044699 single-organism process; GO:0044255 cellular lipid metabolic process; GO:0009058 biosynthetic process; GO:0033197 response to vitamin E; GO:0044237 cellular metabolic process; GO:0008610 lipid biosynthetic process; GO:0008…	GO:0044464 cell part; GO:0005622 intracellular; GO:0005737 cytoplasm; GO:0044424 intracellular part; GO:0005623 cell; GO:0005829 cytosol; GO:0044444 cytoplasmic part;	GO:0004421 hydroxymethylglutaryl-CoA synthase activity; GO:0016746 transferase activity, transferring acyl groups; GO:0042802 identical protein binding; GO:0016853 isomerase activity; GO:0003824 catalytic activity; GO:0046912 transferase activity, transferring acyl groups, acyl groups converted into alkyl on transfer; GO:0042803 protein homodimerization activity; GO:0005488 binding; GO:0046983 pr…	K01641	E2.3.3.10; hydroxymethylglutaryl-CoA synthase [EC:2.3.3.10]	hsa00072 Synthesis and degradation of ketone bodies; hsa00280 Valine, leucine and isoleucine degradation; hsa00650 Butanoate metabolism; hsa00900 Terpenoid backbone biosynthesis; hsa01100 Metabolic pathways; hsa03320 PPAR signaling pathway	IPR016039; IPR013746; IPR013528;	Thiolase-like; Hydroxymethylglutaryl-coenzyme A synthase C-terminal domain; Hydroxymethylglutaryl-coenzyme A synthase, N-terminal;
Q92499	ATP-dependent RNA helicase DDX1 OS=Homo sapiens OX=9606 GN=DDX1 PE=1 SV=2	1.978	Up	0.033575	DDX1	82.431	0.9	0.617	0.451			1.078	1.284	1.53			cytoplasm	GO:0044085 cellular component biogenesis; GO:0022613 ribonucleoprotein complex biogenesis; GO:1903608 protein localization to cytoplasmic stress granule; GO:0022618 ribonucleoprotein complex assembly; GO:0010608 posttranscriptional regulation of gene expression; GO:0097659 nucleic acid-templated transcription; GO:0032392 DNA geometric change; GO:0044699 single-organism process; GO:0009058 biosynt…	GO:0016020 membrane; GO:0005737 cytoplasm; GO:0032991 macromolecular complex; GO:0044424 intracellular part; GO:0016604 nuclear body; GO:0005623 cell; GO:0036464 cytoplasmic ribonucleoprotein granule; GO:0044422 organelle part; GO:0043228 non-membrane-bounded organelle; GO:0031974 membrane-enclosed lumen; GO:0005654 nucleoplasm; GO:0072669 tRNA-splicing ligase complex; GO:0070013 intracellular or…	GO:1901265 nucleoside phosphate binding; GO:0008026 ATP-dependent helicase activity; GO:0016817 hydrolase activity, acting on acid anhydrides; GO:0005515 protein binding; GO:0016787 hydrolase activity; GO:0003682 chromatin binding; GO:0016887 ATPase activity; GO:0097159 organic cyclic compound binding; GO:1901363 heterocyclic compound binding; GO:0016462 pyrophosphatase activity; GO:0032553 ribon…	K13177	DDX1; ATP-dependent RNA helicase DDX1 [EC:3.6.4.13]		IPR011545; IPR001870; IPR027417; IPR013320; IPR003877; IPR014014; IPR014001; IPR001650;	DEAD/DEAH box helicase domain; B30.2/SPRY domain; P-loop containing nucleoside triphosphate hydrolase; Concanavalin A-like lectin/glucanase domain; SPRY domain; RNA helicase, DEAD-box type, Q motif; Helicase superfamily 1/2, ATP-binding domain; Helicase, C-terminal;
Q8TDR0	TRAF3-interacting protein 1 OS=Homo sapiens OX=9606 GN=TRAF3IP1 PE=1 SV=1	1.784	Up	0.033977	TRAF3IP1	78.631				0.77	0.618				1.223	1.253	nucleus	GO:0098840 protein transport along microtubule; GO:0044085 cellular component biogenesis; GO:0001738 morphogenesis of a polarized epithelium; GO:0043009 chordate embryonic development; GO:0002698 negative regulation of immune effector process; GO:0060271 cilium assembly; GO:0031347 regulation of defense response; GO:0015031 protein transport; GO:0044782 cilium organization; GO:0007507 heart devel…	GO:0043229 intracellular organelle; GO:0005929 cilium; GO:0030992 intraciliary transport particle B; GO:0042995 cell projection; GO:0043232 intracellular non-membrane-bounded organelle; GO:0035869 ciliary transition zone; GO:0044430 cytoskeletal part; GO:0097014 ciliary plasm; GO:0044446 intracellular organelle part; GO:0005737 cytoplasm; GO:0036064 ciliary basal body; GO:0032991 macromolecular c…	GO:0015631 tubulin binding; GO:0005515 protein binding; GO:0008092 cytoskeletal protein binding; GO:0008017 microtubule binding; GO:0005488 binding;	K19680	TRAF3IP1, IFT54; TRAF3-interacting protein 1
Q8WWF6	DnaJ homolog subfamily B member 3 OS=Homo sapiens OX=9606 GN=DNAJB3 PE=1 SV=1	1.844	Up	0.02226	DNAJB3	16.558	0.977	0.66	0.789			1.392	1.859	1.222			cytoplasm		GO:0070062 extracellular exosome; GO:0043226 organelle; GO:0044421 extracellular region part; GO:0031982 vesicle; GO:1903561 extracellular vesicle; GO:0043227 membrane-bounded organelle; GO:0005576 extracellular region; GO:0043230 extracellular organelle;		K09509	DNAJB3; DnaJ homolog subfamily B member 3		IPR001623;	DnaJ domain;
P04217	Alpha-1B-glycoprotein OS=Homo sapiens OX=9606 GN=A1BG PE=1 SV=4	1.753	Up	0.027144	A1BG	54.253	0.845	0.697	0.498	1.4	0.637	0.97	1.71	1.913	1.054	1.498	extracellular	GO:0045321 leukocyte activation; GO:0002283 neutrophil activation involved in immune response; GO:0002252 immune effector process; GO:0044699 single-organism process; GO:0002576 platelet degranulation; GO:0050896 response to stimulus; GO:0051234 establishment of localization; GO:0002275 myeloid cell activation involved in immune response; GO:1902578 single-organism localization; GO:0036230 granul…	GO:0034774 secretory granule lumen; GO:0005615 extracellular space; GO:0044421 extracellular region part; GO:0031410 cytoplasmic vesicle; GO:0005737 cytoplasm; GO:0031982 vesicle; GO:0044433 cytoplasmic vesicle part; GO:0044424 intracellular part; GO:0005623 cell; GO:1904813 ficolin-1-rich granule lumen; GO:0044422 organelle part; GO:0101002 ficolin-1-rich granule; GO:0031974 membrane-enclosed lu…	GO:0005515 protein binding; GO:0005488 binding;				IPR003598; IPR007110; IPR013783; IPR003599;	Immunoglobulin subtype 2; Immunoglobulin-like domain; Immunoglobulin-like fold; Immunoglobulin subtype;
P04004	Vitronectin OS=Homo sapiens OX=9606 GN=VTN PE=1 SV=1	2.852	Up	0.021685	VTN	54.305	0.73	0.713	0.325	0.595	0.536	0.793	0.842	2.939	1.014	2.681	extracellular	GO:0060627 regulation of vesicle-mediated transport; GO:0044085 cellular component biogenesis; GO:0065008 regulation of biological quality; GO:0030335 positive regulation of cell migration; GO:0048732 gland development; GO:0032270 positive regulation of cellular protein metabolic process; GO:0031347 regulation of defense response; GO:0007492 endoderm development; GO:0022610 biological adhesion; G…	GO:0016020 membrane; GO:0005615 extracellular space; GO:0044421 extracellular region part; GO:0005783 endoplasmic reticulum; GO:0071944 cell periphery; GO:0098796 membrane protein complex; GO:0031982 vesicle; GO:0005737 cytoplasm; GO:0032991 macromolecular complex; GO:0044424 intracellular part; GO:0005623 cell; GO:0044420 extracellular matrix component; GO:0044422 organelle part; GO:0005604 base…	GO:0005102 receptor binding; GO:0043167 ion binding; GO:0044877 macromolecular complex binding; GO:0038024 cargo receptor activity; GO:0005044 scavenger receptor activity; GO:0005515 protein binding; GO:0005178 integrin binding; GO:0008201 heparin binding; GO:1901681 sulfur compound binding; GO:0050840 extracellular matrix binding; GO:0050839 cell adhesion molecule binding; GO:0060089 molecular t…	K06251	VTN; vitronectin	hsa04151 PI3K-Akt signaling pathway; hsa04510 Focal adhesion; hsa04512 ECM-receptor interaction; hsa04610 Complement and coagulation cascades; hsa05165 Human papillomavirus infection; hsa05205 Proteoglycans in cancer	IPR000585; IPR020436; IPR001212;	Hemopexin-like domain; Somatomedin B, chordata; Somatomedin B domain;
Q14CN2	Calcium-activated chloride channel regulator 4 OS=Homo sapiens OX=9606 GN=CLCA4 PE=1 SV=2	2.305	Up	0.045581	CLCA4	101.28	0.613	0.686	0.836	0.762	0.578	1.435	0.942	3.49	1.092	1.05	plasma membrane	GO:0098661 inorganic anion transmembrane transport; GO:0034220 ion transmembrane transport; GO:0098660 inorganic ion transmembrane transport; GO:0006821 chloride transport; GO:0044238 primary metabolic process; GO:0098656 anion transmembrane transport; GO:0071704 organic substance metabolic process; GO:1902476 chloride transmembrane transport; GO:0051234 establishment of localization; GO:0006810 …	GO:0016020 membrane; GO:0044421 extracellular region part; GO:0031226 intrinsic component of plasma membrane; GO:0016324 apical plasma membrane; GO:0071944 cell periphery; GO:0031982 vesicle; GO:0031224 intrinsic component of membrane; GO:0005887 integral component of plasma membrane; GO:0005623 cell; GO:0005576 extracellular region; GO:0016021 integral component of membrane; GO:0005886 plasma me…	GO:0022839 ion gated channel activity; GO:0004222 metalloendopeptidase activity; GO:0008233 peptidase activity; GO:0015075 ion transmembrane transporter activity; GO:0043167 ion binding; GO:0022803 passive transmembrane transporter activity; GO:0061778 intracellular chloride channel activity; GO:0005253 anion channel activity; GO:0022892 substrate-specific transporter activity; GO:0016787 hydrola…	K05030	CLCA3_4; calcium-activated chloride channel regulator 3/4	hsa04924 Renin secretion; hsa04972 Pancreatic secretion	IPR002035;	von Willebrand factor, type A;
O96009	Napsin-A OS=Homo sapiens OX=9606 GN=NAPSA PE=1 SV=1	4.336	Up	0.0023395	NAPSA	45.386	0.589	0.644	0.169	0.254	0.136	0.884	1.927	1.225	2.447	1.287	extracellular	GO:0044707 single-multicellular organism process; GO:0065008 regulation of biological quality; GO:0048875 chemical homeostasis within a tissue; GO:0044267 cellular protein metabolic process; GO:0044699 single-organism process; GO:0006914 autophagy; GO:0033619 membrane protein proteolysis; GO:0044238 primary metabolic process; GO:0032501 multicellular organismal process; GO:0044237 cellular metabo…	GO:0005615 extracellular space; GO:0044421 extracellular region part; GO:0031410 cytoplasmic vesicle; GO:0005737 cytoplasm; GO:0031982 vesicle; GO:0044433 cytoplasmic vesicle part; GO:0044424 intracellular part; GO:0042599 lamellar body; GO:0005623 cell; GO:0031906 late endosome lumen; GO:0044422 organelle part; GO:0031974 membrane-enclosed lumen; GO:0070062 extracellular exosome; GO:0070013 intr…	GO:0004175 endopeptidase activity; GO:0008233 peptidase activity; GO:0003824 catalytic activity; GO:0004190 aspartic-type endopeptidase activity; GO:0070011 peptidase activity, acting on L-amino acid peptides; GO:0016787 hydrolase activity; GO:0070001 aspartic-type peptidase activity;	K08565	NAPSA; napsin-A [EC:3.4.23.-]	hsa04142 Lysosome	IPR033121; IPR021109;	Peptidase family A1 domain; Aspartic peptidase domain;
O75874	Isocitrate dehydrogenase [NADP] cytoplasmic OS=Homo sapiens OX=9606 GN=IDH1 PE=1 SV=2	0.489	Down	0.0074617	IDH1	46.659	1.665	2.669	1.465	1.127	1.927	1.075	0.816	0.83	1.098	0.507	cytoplasm	GO:0019362 pyridine nucleotide metabolic process; GO:0045321 leukocyte activation; GO:0006518 peptide metabolic process; GO:0022414 reproductive process; GO:0019216 regulation of lipid metabolic process; GO:0044237 cellular metabolic process; GO:0008152 metabolic process; GO:0006091 generation of precursor metabolites and energy; GO:0044262 cellular carbohydrate metabolic process; GO:0044702 sing…	GO:0034774 secretory granule lumen; GO:1904724 tertiary granule lumen; GO:0044421 extracellular region part; GO:0031410 cytoplasmic vesicle; GO:0005737 cytoplasm; GO:0031982 vesicle; GO:0044433 cytoplasmic vesicle part; GO:0044438 microbody part; GO:0044424 intracellular part; GO:0005623 cell; GO:1904813 ficolin-1-rich granule lumen; GO:0044422 organelle part; GO:0070062 extracellular exosome; GO…	GO:0000287 magnesium ion binding; GO:1901265 nucleoside phosphate binding; GO:0005102 receptor binding; GO:0046983 protein dimerization activity; GO:0043167 ion binding; GO:0004448 isocitrate dehydrogenase activity; GO:0005515 protein binding; GO:0000166 nucleotide binding; GO:0048037 cofactor binding; GO:0016491 oxidoreductase activity; GO:0097159 organic cyclic compound binding; GO:1901363 hete…	K00031	IDH1, IDH2, icd; isocitrate dehydrogenase [EC:1.1.1.42]	hsa00020 Citrate cycle (TCA cycle); hsa00480 Glutathione metabolism; hsa01100 Metabolic pathways; hsa01200 Carbon metabolism; hsa01210 2-Oxocarboxylic acid metabolism; hsa01230 Biosynthesis of amino acids; hsa04146 Peroxisome	IPR024084;	Isopropylmalate dehydrogenase-like domain;
P60174	Triosephosphate isomerase OS=Homo sapiens OX=9606 GN=TPI1 PE=1 SV=3	0.606	Down	0.0154841	TPI1	30.791	1.418	0.856	1.662	1.618	1.768	0.784	0.77	1.12	0.719	1.042	cytoplasm	GO:0046365 monosaccharide catabolic process; GO:0006757 ATP generation from ADP; GO:0006739 NADP metabolic process; GO:0009116 nucleoside metabolic process; GO:0042278 purine nucleoside metabolic process; GO:0006165 nucleoside diphosphate phosphorylation; GO:0046031 ADP metabolic process; GO:0019362 pyridine nucleotide metabolic process; GO:0019319 hexose biosynthetic process; GO:0006096 glycolyt…	GO:0043229 intracellular organelle; GO:0005615 extracellular space; GO:0044421 extracellular region part; GO:0031982 vesicle; GO:0005737 cytoplasm; GO:0044424 intracellular part; GO:0005623 cell; GO:0005829 cytosol; GO:0005576 extracellular region; GO:0043231 intracellular membrane-bounded organelle; GO:0043226 organelle; GO:0070062 extracellular exosome; GO:0005634 nucleus; GO:0005622 intracellu…	GO:0016853 isomerase activity; GO:0004807 triose-phosphate isomerase activity; GO:0031625 ubiquitin protein ligase binding; GO:0003824 catalytic activity; GO:0005488 binding; GO:0005515 protein binding; GO:0016860 intramolecular oxidoreductase activity; GO:0044389 ubiquitin-like protein ligase binding; GO:0016861 intramolecular oxidoreductase activity, interconverting aldoses and ketoses; GO:0019…	K01803	TPI, tpiA; triosephosphate isomerase (TIM) [EC:5.3.1.1]	hsa00010 Glycolysis / Gluconeogenesis; hsa00051 Fructose and mannose metabolism; hsa00562 Inositol phosphate metabolism; hsa01100 Metabolic pathways; hsa01200 Carbon metabolism; hsa01230 Biosynthesis of amino acids	IPR013785;	Aldolase-type TIM barrel;
Q16775	"Hydroxyacylglutathione hydrolase, mitochondrial OS=Homo sapiens OX=9606 GN=HAGH PE=1 SV=2"	0.493	Down	0.0098152	HAGH	33.805	1.944	2.917	1.732	1.764	1.23	0.83	0.939	1.088	0.945	0.929	mitochondria	GO:0006518 peptide metabolic process; GO:1901615 organic hydroxy compound metabolic process; GO:0042182 ketone catabolic process; GO:0042398 cellular modified amino acid biosynthetic process; GO:0044699 single-organism process; GO:0009058 biosynthetic process; GO:1901566 organonitrogen compound biosynthetic process; GO:0044237 cellular metabolic process; GO:0044272 sulfur compound biosynthetic pr…	GO:0005759 mitochondrial matrix; GO:0043229 intracellular organelle; GO:0044421 extracellular region part; GO:0044429 mitochondrial part; GO:0005737 cytoplasm; GO:0044446 intracellular organelle part; GO:0031982 vesicle; GO:0044424 intracellular part; GO:0005829 cytosol; GO:0005623 cell; GO:0005576 extracellular region; GO:0044422 organelle part; GO:0005739 mitochondrion; GO:0043231 intracellular…	GO:0004416 hydroxyacylglutathione hydrolase activity; GO:0003824 catalytic activity; GO:0005488 binding; GO:0043167 ion binding; GO:0016788 hydrolase activity, acting on ester bonds; GO:0043169 cation binding; GO:0046872 metal ion binding; GO:0005515 protein binding; GO:0016787 hydrolase activity; GO:0016790 thiolester hydrolase activity;	K01069	gloB, HAGH; hydroxyacylglutathione hydrolase [EC:3.1.2.6]	hsa00620 Pyruvate metabolism; hsa01100 Metabolic pathways	IPR001279; IPR032282;	Metallo-beta-lactamase; Hydroxyacylglutathione hydrolase, C-terminal domain;
Q86VE9	Serine incorporator 5 OS=Homo sapiens OX=9606 GN=SERINC5 PE=2 SV=1	1.707	Up	0.04564	SERINC5	47.009	1.086	0.74	0.57	0.296	0.494	1.362	1.207	0.646	1.159	1.063	plasma membrane	GO:0032329 serine transport; GO:0046486 glycerolipid metabolic process; GO:0016053 organic acid biosynthetic process; GO:0007272 ensheathment of neurons; GO:0006643 membrane lipid metabolic process; GO:0098542 defense response to other organism; GO:0008654 phospholipid biosynthetic process; GO:1904219 positive regulation of CDP-diacylglycerol-serine O-phosphatidyltransferase activity; GO:0044699 …	GO:0043229 intracellular organelle; GO:0016020 membrane; GO:0044421 extracellular region part; GO:0071944 cell periphery; GO:0031982 vesicle; GO:0005737 cytoplasm; GO:0012505 endomembrane system; GO:0031224 intrinsic component of membrane; GO:0044424 intracellular part; GO:0005623 cell; GO:0005576 extracellular region; GO:0016021 integral component of membrane; GO:0005886 plasma membrane; GO:0043…	GO:0005342 organic acid transmembrane transporter activity; GO:0015179 L-amino acid transmembrane transporter activity; GO:0015075 ion transmembrane transporter activity; GO:1905361 L-serine transporter activity; GO:0022889 serine transmembrane transporter activity; GO:0022892 substrate-specific transporter activity; GO:0015194 L-serine transmembrane transporter activity; GO:0022891 substrate-spe…
O43493	Trans-Golgi network integral membrane protein 2 OS=Homo sapiens OX=9606 GN=TGOLN2 PE=1 SV=4	0.328	Down	0.047199	TGOLN2	45.879				1.365	0.986				0.312	0.459	extracellular	GO:0016043 cellular component organization; GO:0046907 intracellular transport; GO:0006895 Golgi to endosome transport; GO:0016192 vesicle-mediated transport; GO:0048193 Golgi vesicle transport; GO:0051234 establishment of localization; GO:0051641 cellular localization; GO:0016197 endosomal transport; GO:0006810 transport; GO:0051649 establishment of localization in cell; GO:0061024 membrane orga…	GO:0016020 membrane; GO:0031090 organelle membrane; GO:0031410 cytoplasmic vesicle; GO:0071944 cell periphery; GO:0005737 cytoplasm; GO:0031982 vesicle; GO:0044433 cytoplasmic vesicle part; GO:0031224 intrinsic component of membrane; GO:0044424 intracellular part; GO:0005623 cell; GO:0030662 coated vesicle membrane; GO:0044422 organelle part; GO:0031974 membrane-enclosed lumen; GO:0005654 nucleop…	GO:0005515 protein binding; GO:0005488 binding;
P22732	"Solute carrier family 2, facilitated glucose transporter member 5 OS=Homo sapiens OX=9606 GN=SLC2A5 PE=1 SV=1"	1.889	Up	0.029298	SLC2A5	54.973	0.72	0.851	0.67	0.47	0.433	0.708	1.684	1.051	0.78	1.715	plasma membrane	GO:0071331 cellular response to hexose stimulus; GO:0065008 regulation of biological quality; GO:0009746 response to hexose; GO:0045321 leukocyte activation; GO:0044699 single-organism process; GO:0051234 establishment of localization; GO:0034219 carbohydrate transmembrane transport; GO:0008152 metabolic process; GO:0003073 regulation of systemic arterial blood pressure; GO:0071322 cellular respo…	GO:0016020 membrane; GO:0044421 extracellular region part; GO:0016324 apical plasma membrane; GO:0031090 organelle membrane; GO:0031410 cytoplasmic vesicle; GO:0071944 cell periphery; GO:0005737 cytoplasm; GO:0031982 vesicle; GO:0044433 cytoplasmic vesicle part; GO:0031224 intrinsic component of membrane; GO:0044424 intracellular part; GO:0005887 integral component of plasma membrane; GO:0005623 …	GO:0005355 glucose transmembrane transporter activity; GO:0051119 sugar transmembrane transporter activity; GO:1901476 carbohydrate transporter activity; GO:0022892 substrate-specific transporter activity; GO:0005353 fructose transmembrane transporter activity; GO:0015145 monosaccharide transmembrane transporter activity; GO:0048029 monosaccharide binding; GO:0022891 substrate-specific transmembr…	K08143	SLC2A5, GLUT5; MFS transporter, SP family, solute carrier family 2 (facilitated glucose/fructose transporter), member 5	hsa04973 Carbohydrate digestion and absorption	IPR020846;	Major facilitator superfamily domain;
P20339	Ras-related protein Rab-5A OS=Homo sapiens OX=9606 GN=RAB5A PE=1 SV=2	0.495	Down	0.0031206	RAB5A	23.658	2.103	1.396	1.362	1.531	1.794	0.935	1.213	0.815	0.576	0.516	mitochondria	GO:0044700 single organism signaling; GO:0060627 regulation of vesicle-mediated transport; GO:0019079 viral genome replication; GO:0007596 blood coagulation; GO:0065008 regulation of biological quality; GO:0007166 cell surface receptor signaling pathway; GO:0060491 regulation of cell projection assembly; GO:0044255 cellular lipid metabolic process; GO:0044237 cellular metabolic process; GO:001503…	GO:0016020 membrane; GO:0030425 dendrite; GO:0044421 extracellular region part; GO:0031090 organelle membrane; GO:0098857 membrane microdomain; GO:0005737 cytoplasm; GO:0044433 cytoplasmic vesicle part; GO:0043025 neuronal cell body; GO:0098559 cytoplasmic side of early endosome membrane; GO:0005623 cell; GO:0044422 organelle part; GO:0005769 early endosome; GO:0043228 non-membrane-bounded organe…	GO:1901265 nucleoside phosphate binding; GO:0001882 nucleoside binding; GO:0043167 ion binding; GO:0016817 hydrolase activity, acting on acid anhydrides; GO:0016787 hydrolase activity; GO:0005515 protein binding; GO:0000166 nucleotide binding; GO:0017111 nucleoside-triphosphatase activity; GO:0097159 organic cyclic compound binding; GO:1901363 heterocyclic compound binding; GO:0032549 ribonucleos…	K07887	RAB5A; Ras-related protein Rab-5A	hsa04014 Ras signaling pathway; hsa04144 Endocytosis; hsa04145 Phagosome; hsa04962 Vasopressin-regulated water reabsorption; hsa05014 Amyotrophic lateral sclerosis (ALS); hsa05146 Amoebiasis; hsa05152 Tuberculosis	IPR005225; IPR027417;	Small GTP-binding protein domain; P-loop containing nucleoside triphosphate hydrolase;
Q12907	Vesicular integral-membrane protein VIP36 OS=Homo sapiens OX=9606 GN=LMAN2 PE=1 SV=1	2.658	Up	0.040935	LMAN2	40.228	0.684	0.637	0.543			0.865	1.75	2.339			cytoplasm	GO:0050794 regulation of cellular process; GO:0060627 regulation of vesicle-mediated transport; GO:0030100 regulation of endocytosis; GO:0045807 positive regulation of endocytosis; GO:0051049 regulation of transport; GO:0016192 vesicle-mediated transport; GO:0050766 positive regulation of phagocytosis; GO:0048193 Golgi vesicle transport; GO:0048522 positive regulation of cellular process; GO:0071…	GO:0016020 membrane; GO:0042175 nuclear outer membrane-endoplasmic reticulum membrane network; GO:0005615 extracellular space; GO:0044421 extracellular region part; GO:0005783 endoplasmic reticulum; GO:0031090 organelle membrane; GO:0071944 cell periphery; GO:0031982 vesicle; GO:0005737 cytoplasm; GO:0031224 intrinsic component of membrane; GO:0044424 intracellular part; GO:0005887 integral compo…	GO:0097367 carbohydrate derivative binding; GO:0031072 heat shock protein binding; GO:0005488 binding; GO:0043167 ion binding; GO:0005537 mannose binding; GO:0046872 metal ion binding; GO:0043169 cation binding; GO:0030246 carbohydrate binding; GO:0005515 protein binding; GO:0048029 monosaccharide binding; GO:0001948 glycoprotein binding; GO:0036094 small molecule binding;	K10082	LMAN2, VIP36; lectin, mannose-binding 2	hsa04141 Protein processing in endoplasmic reticulum	IPR005052; IPR013320;	Legume-like lectin; Concanavalin A-like lectin/glucanase domain;
P62136	Serine/threonine-protein phosphatase PP1-alpha catalytic subunit OS=Homo sapiens OX=9606 GN=PPP1CA PE=1 SV=1	1.581	Up	0.022419	PPP1CA	37.512	0.61	0.655	0.9			1.165	1.032	1.225			cytoplasm	GO:0044700 single organism signaling; GO:0010941 regulation of cell death; GO:0065008 regulation of biological quality; GO:0005981 regulation of glycogen catabolic process; GO:0032885 regulation of polysaccharide biosynthetic process; GO:0007166 cell surface receptor signaling pathway; GO:0030323 respiratory tube development; GO:0010608 posttranscriptional regulation of gene expression; GO:004355…	GO:0016020 membrane; GO:0030425 dendrite; GO:0044421 extracellular region part; GO:0071944 cell periphery; GO:0030054 cell junction; GO:0031982 vesicle; GO:0005737 cytoplasm; GO:0043025 neuronal cell body; GO:0032991 macromolecular complex; GO:0008287 protein serine/threonine phosphatase complex; GO:0044424 intracellular part; GO:0005913 cell-cell adherens junction; GO:0072357 PTW/PP1 phosphatase…	GO:0019903 protein phosphatase binding; GO:0004722 protein serine/threonine phosphatase activity; GO:0016791 phosphatase activity; GO:0044877 macromolecular complex binding; GO:0043167 ion binding; GO:0005515 protein binding; GO:0016787 hydrolase activity; GO:0004721 phosphoprotein phosphatase activity; GO:0098632 protein binding involved in cell-cell adhesion; GO:0050839 cell adhesion molecule b…	K06269	PPP1C; serine/threonine-protein phosphatase PP1 catalytic subunit [EC:3.1.3.16]	hsa03015 mRNA surveillance pathway; hsa04022 cGMP-PKG signaling pathway; hsa04024 cAMP signaling pathway; hsa04114 Oocyte meiosis; hsa04218 Cellular senescence; hsa04261 Adrenergic signaling in cardiomyocytes; hsa04270 Vascular smooth muscle contraction; hsa04390 Hippo signaling pathway; hsa04510 Focal adhesion; hsa04611 Platelet activation; hsa04720 Long-term potentiation; hsa04728 Dopaminergic …	IPR029052; IPR004843; IPR031675; IPR006186;	Metallo-dependent phosphatase-like; Calcineurin-like phosphoesterase domain, ApaH type; Serine-threonine protein phosphatase, N-terminal; Serine/threonine-specific protein phosphatase/bis(5-nucleosyl)-tetraphosphatase;
Q9P121	Neurotrimin OS=Homo sapiens OX=9606 GN=NTM PE=1 SV=1	1.785	Up	0.031281	NTM	37.971				0.551	0.446				0.883	0.897	plasma membrane	GO:0043687 post-translational protein modification; GO:0044707 single-multicellular organism process; GO:0048666 neuron development; GO:0048869 cellular developmental process; GO:0044267 cellular protein metabolic process; GO:0044699 single-organism process; GO:0022008 neurogenesis; GO:0009058 biosynthetic process; GO:0008038 neuron recognition; GO:0008037 cell recognition; GO:0044237 cellular me…	GO:0016020 membrane; GO:0044464 cell part; GO:0071944 cell periphery; GO:0044425 membrane part; GO:0031225 anchored component of membrane; GO:0031224 intrinsic component of membrane; GO:0005623 cell; GO:0005576 extracellular region; GO:0005886 plasma membrane;	GO:0005515 protein binding; GO:0005488 binding;	K06774	HNT; neurotrimin		IPR003598; IPR007110; IPR013783; IPR003599; IPR013151; IPR013098;	Immunoglobulin subtype 2; Immunoglobulin-like domain; Immunoglobulin-like fold; Immunoglobulin subtype; Immunoglobulin; Immunoglobulin I-set;
Q6WKZ4	Rab11 family-interacting protein 1 OS=Homo sapiens OX=9606 GN=RAB11FIP1 PE=1 SV=3	0.586	Down	0.013878	RAB11FIP1	137.17	1.651	1.994	1.189	1.156	1.864	1.066	0.587	0.741	1.015	1.19	nucleus	GO:0050794 regulation of cellular process; GO:0065008 regulation of biological quality; GO:0023051 regulation of signaling; GO:0051046 regulation of secretion; GO:0051241 negative regulation of multicellular organismal process; GO:0044699 single-organism process; GO:0048519 negative regulation of biological process; GO:0048523 negative regulation of cellular process; GO:0015031 protein transport;…	GO:0097708 intracellular vesicle; GO:0016020 membrane; GO:0043229 intracellular organelle; GO:0098588 bounding membrane of organelle; GO:0031090 organelle membrane; GO:0030666 endocytic vesicle membrane; GO:0031410 cytoplasmic vesicle; GO:0044446 intracellular organelle part; GO:0005737 cytoplasm; GO:0031982 vesicle; GO:0044433 cytoplasmic vesicle part; GO:0012505 endomembrane system; GO:0012506 …	GO:0031267 small GTPase binding; GO:0017016 Ras GTPase binding; GO:0005488 binding; GO:0005515 protein binding; GO:0051020 GTPase binding; GO:0019899 enzyme binding; GO:0017137 Rab GTPase binding;	K12484	RAB11FIP1_2_5; Rab11 family-interacting protein 1/2/5	hsa04144 Endocytosis	IPR019018; IPR000008;	Rab-binding domain FIP-RBD; C2 domain;
Q86Y38	Xylosyltransferase 1 OS=Homo sapiens OX=9606 GN=XYLT1 PE=1 SV=1	0.253	Down	0.046764	XYLT1	107.57	1.709	4.512	1.559			1.015	0.319	0.631			endoplasmic reticulum,Golgi apparatus	GO:0030201 heparan sulfate proteoglycan metabolic process; GO:0030206 chondroitin sulfate biosynthetic process; GO:0006024 glycosaminoglycan biosynthetic process; GO:0044699 single-organism process; GO:0009058 biosynthetic process; GO:1901566 organonitrogen compound biosynthetic process; GO:0044237 cellular metabolic process; GO:0044272 sulfur compound biosynthetic process; GO:0071704 organic sub…	GO:0043229 intracellular organelle; GO:0016020 membrane; GO:0042175 nuclear outer membrane-endoplasmic reticulum membrane network; GO:0005783 endoplasmic reticulum; GO:0098588 bounding membrane of organelle; GO:0031090 organelle membrane; GO:0044446 intracellular organelle part; GO:0005737 cytoplasm; GO:0000139 Golgi membrane; GO:0031224 intrinsic component of membrane; GO:0012505 endomembrane sy…	GO:0008375 acetylglucosaminyltransferase activity; GO:0016763 transferase activity, transferring pentosyl groups; GO:0030158 protein xylosyltransferase activity; GO:0016758 transferase activity, transferring hexosyl groups; GO:0042285 xylosyltransferase activity; GO:0003824 catalytic activity; GO:0035252 UDP-xylosyltransferase activity; GO:0008194 UDP-glycosyltransferase activity; GO:0016757 tran…	K00771	XYLT; protein xylosyltransferase [EC:2.4.2.26]	hsa00532 Glycosaminoglycan biosynthesis - chondroitin sulfate / dermatan sulfate; hsa00534 Glycosaminoglycan biosynthesis - heparan sulfate / heparin; hsa01100 Metabolic pathways
P42658	Dipeptidyl aminopeptidase-like protein 6 OS=Homo sapiens OX=9606 GN=DPP6 PE=1 SV=2	0.335	Down	0.025663	DPP6	97.587	2.139	1.003	2.301			0.793	0.542	0.486			nucleus	GO:0050794 regulation of cellular process; GO:0016043 cellular component organization; GO:0010256 endomembrane system organization; GO:0044699 single-organism process; GO:1990778 protein localization to cell periphery; GO:0071704 organic substance metabolic process; GO:0008152 metabolic process; GO:0043266 regulation of potassium ion transport; GO:1902578 single-organism localization; GO:0032879 …	GO:0016020 membrane; GO:0031226 intrinsic component of plasma membrane; GO:0044421 extracellular region part; GO:0071944 cell periphery; GO:0031982 vesicle; GO:0034703 cation channel complex; GO:0032991 macromolecular complex; GO:0031224 intrinsic component of membrane; GO:0005887 integral component of plasma membrane; GO:1902495 transmembrane transporter complex; GO:0005623 cell; GO:0016021 inte…	GO:0008233 peptidase activity; GO:0015459 potassium channel regulator activity; GO:0003824 catalytic activity; GO:0017171 serine hydrolase activity; GO:0016247 channel regulator activity; GO:0008236 serine-type peptidase activity; GO:0099106 ion channel regulator activity; GO:0070011 peptidase activity, acting on L-amino acid peptides; GO:0016787 hydrolase activity; GO:0098772 molecular function …	K23013			IPR001375; IPR029058; IPR002469;	Peptidase S9, prolyl oligopeptidase, catalytic domain; Alpha/Beta hydrolase fold; Dipeptidylpeptidase IV, N-terminal domain;
Q9Y4F4	TOG array regulator of axonemal microtubules protein 1 OS=Homo sapiens OX=9606 GN=TOGARAM1 PE=1 SV=4	1.743	Up	0.0049233	TOGARAM1	189.36	0.951	0.622	0.664	0.504	0.502	0.978	1.545	0.957	0.997	1.177	nucleus	GO:0050794 regulation of cellular process; GO:0044085 cellular component biogenesis; GO:0016043 cellular component organization; GO:0032273 positive regulation of protein polymerization; GO:0031116 positive regulation of microtubule polymerization; GO:0044699 single-organism process; GO:0060271 cilium assembly; GO:0044087 regulation of cellular component biogenesis; GO:0031110 regulation of micro…	GO:0043229 intracellular organelle; GO:0005929 cilium; GO:0042995 cell projection; GO:0043232 intracellular non-membrane-bounded organelle; GO:0044430 cytoskeletal part; GO:0044446 intracellular organelle part; GO:0005737 cytoplasm; GO:0036064 ciliary basal body; GO:0044424 intracellular part; GO:0044463 cell projection part; GO:0005623 cell; GO:0044422 organelle part; GO:0043228 non-membrane-bou…	GO:0005488 binding;				IPR034085; IPR011989; IPR016024;	TOG domain; Armadillo-like helical; Armadillo-type fold;
P13727	Bone marrow proteoglycan OS=Homo sapiens OX=9606 GN=PRG2 PE=1 SV=2	3.112	Up	0.0052375	PRG2	25.205	0.622	0.617	0.353	0.447	0.344	1.73	1.284	2.217	1.658	0.526	extracellular	GO:0045321 leukocyte activation; GO:0098542 defense response to other organism; GO:0044699 single-organism process; GO:0051241 negative regulation of multicellular organismal process; GO:0001818 negative regulation of cytokine production; GO:0032753 positive regulation of interleukin-4 production; GO:0051234 establishment of localization; GO:0009607 response to biotic stimulus; GO:0009605 respons…	GO:0097708 intracellular vesicle; GO:0043229 intracellular organelle; GO:0044421 extracellular region part; GO:0031410 cytoplasmic vesicle; GO:0044446 intracellular organelle part; GO:0005737 cytoplasm; GO:0031982 vesicle; GO:0044433 cytoplasmic vesicle part; GO:0012505 endomembrane system; GO:0044424 intracellular part; GO:0005623 cell; GO:1904813 ficolin-1-rich granule lumen; GO:0005576 extrace…	GO:0030246 carbohydrate binding; GO:0097367 carbohydrate derivative binding; GO:0043168 anion binding; GO:0008201 heparin binding; GO:0005539 glycosaminoglycan binding; GO:1901681 sulfur compound binding; GO:0005488 binding; GO:0043167 ion binding;	K10786	PRG2, MBP; bone marrow proteoglycan	hsa05310 Asthma	IPR001304; IPR016187; IPR033816; IPR016186;	C-type lectin-like; C-type lectin fold; Eosinophil major basic protein, C-type lectin-like domain; C-type lectin-like/link domain;
P51674	Neuronal membrane glycoprotein M6-a OS=Homo sapiens OX=9606 GN=GPM6A PE=1 SV=2	2.132	Up	0.0178977	GPM6A	31.209	0.513	0.543	0.544	0.696	0.606	0.651	1.161	1.896	1.11	1.368	plasma membrane	GO:0044085 cellular component biogenesis; GO:0051674 localization of cell; GO:0060491 regulation of cell projection assembly; GO:0048869 cellular developmental process; GO:0048666 neuron development; GO:0032989 cellular component morphogenesis; GO:0022008 neurogenesis; GO:0003407 neural retina development; GO:0044699 single-organism process; GO:0051234 establishment of localization; GO:0051130 po…	GO:0030425 dendrite; GO:0016020 membrane; GO:0044421 extracellular region part; GO:0071944 cell periphery; GO:0031982 vesicle; GO:0043025 neuronal cell body; GO:0031224 intrinsic component of membrane; GO:0030426 growth cone; GO:0098858 actin-based cell projection; GO:0005623 cell; GO:0043197 dendritic spine; GO:0070062 extracellular exosome; GO:0044309 neuron spine; GO:0044464 cell part; GO:0044…	GO:0015075 ion transmembrane transporter activity; GO:0022803 passive transmembrane transporter activity; GO:0022892 substrate-specific transporter activity; GO:0005515 protein binding; GO:0015267 channel activity; GO:0022891 substrate-specific transmembrane transporter activity; GO:0046873 metal ion transmembrane transporter activity; GO:0072509 divalent inorganic cation transmembrane transporte…
P10301	Ras-related protein R-Ras OS=Homo sapiens OX=9606 GN=RRAS PE=1 SV=1	0.587	Down	0.0076762	RRAS	23.48	1.427	1.763	1.553			0.924	1.073	0.789			nucleus	GO:0044700 single organism signaling; GO:0051896 regulation of protein kinase B signaling; GO:0048869 cellular developmental process; GO:0023051 regulation of signaling; GO:0044699 single-organism process; GO:0040013 negative regulation of locomotion; GO:0007165 signal transduction; GO:0010646 regulation of cell communication; GO:0007154 cell communication; GO:0051240 positive regulation of multi…	GO:0016020 membrane; GO:0044421 extracellular region part; GO:0030054 cell junction; GO:0071944 cell periphery; GO:0031982 vesicle; GO:0070161 anchoring junction; GO:0005623 cell; GO:0005576 extracellular region; GO:0005886 plasma membrane; GO:0043226 organelle; GO:0070062 extracellular exosome; GO:0005925 focal adhesion; GO:0005622 intracellular; GO:0044464 cell part; GO:0005912 adherens junctio…	GO:1901265 nucleoside phosphate binding; GO:0016817 hydrolase activity, acting on acid anhydrides; GO:0016787 hydrolase activity; GO:0005515 protein binding; GO:1901363 heterocyclic compound binding; GO:0097159 organic cyclic compound binding; GO:0016462 pyrophosphatase activity; GO:0019003 GDP binding; GO:0003824 catalytic activity; GO:0032553 ribonucleotide binding; GO:0005488 binding; GO:00039…	K07829	RRAS; Ras-related protein R-Ras	hsa04010 MAPK signaling pathway; hsa04014 Ras signaling pathway; hsa04015 Rap1 signaling pathway; hsa04024 cAMP signaling pathway; hsa04072 Phospholipase D signaling pathway; hsa04137 Mitophagy - animal; hsa04140 Autophagy - animal; hsa04218 Cellular senescence; hsa04360 Axon guidance; hsa04371 Apelin signaling pathway; hsa04625 C-type lectin receptor signaling pathway; hsa04810 Regulation of act…	IPR005225; IPR027417;	Small GTP-binding protein domain; P-loop containing nucleoside triphosphate hydrolase;
C9JI98	Transmembrane protein 238 OS=Homo sapiens OX=9606 GN=TMEM238 PE=1 SV=1	0.293	Down	0.0187205	TMEM238	18.04				1.218	1.571				0.362	0.454	plasma membrane		GO:0031224 intrinsic component of membrane; GO:0016020 membrane; GO:0016021 integral component of membrane; GO:0044425 membrane part;
P98164	Low-density lipoprotein receptor-related protein 2 OS=Homo sapiens OX=9606 GN=LRP2 PE=1 SV=3	2.325	Up	0.0151157	LRP2	521.95	0.706	0.792	0.478	0.59	0.346	1.117	2.59	0.808	1.388	0.867	plasma membrane	GO:0001568 blood vessel development; GO:0007420 brain development; GO:0044699 single-organism process; GO:0044255 cellular lipid metabolic process; GO:0044237 cellular metabolic process; GO:0015031 protein transport; GO:0051234 establishment of localization; GO:0006775 fat-soluble vitamin metabolic process; GO:0008152 metabolic process; GO:0007507 heart development; GO:0044872 lipoprotein localiz…	GO:0016020 membrane; GO:0044421 extracellular region part; GO:0098862 cluster of actin-based cell projections; GO:0005783 endoplasmic reticulum; GO:0005903 brush border; GO:0016324 apical plasma membrane; GO:0031410 cytoplasmic vesicle; GO:0031090 organelle membrane; GO:0071944 cell periphery; GO:0031982 vesicle; GO:0005737 cytoplasm; GO:0044433 cytoplasmic vesicle part; GO:0031224 intrinsic comp…	GO:0008565 protein transporter activity; GO:0043167 ion binding; GO:0038024 cargo receptor activity; GO:0022892 substrate-specific transporter activity; GO:0005515 protein binding; GO:0042954 lipoprotein transporter activity; GO:0017124 SH3 domain binding; GO:0030228 lipoprotein particle receptor activity; GO:0060089 molecular transducer activity; GO:0004872 receptor activity; GO:0005488 binding;…	K06233	LRP2; low density lipoprotein-related protein 2	hsa04340 Hedgehog signaling pathway; hsa04918 Thyroid hormone synthesis; hsa04979 Cholesterol metabolism	IPR026823; IPR001881; IPR000742; IPR009030; IPR011042;	Complement Clr-like EGF domain; EGF-like calcium-binding domain; EGF-like domain; Growth factor receptor cysteine-rich domain; Six-bladed beta-propeller, TolB-like;
Q16625	Occludin OS=Homo sapiens OX=9606 GN=OCLN PE=1 SV=1	2.434	Up	0.043124	OCLN	59.143	0.573	0.738	0.296			0.942	1.668	1.302			plasma membrane	GO:0044085 cellular component biogenesis; GO:0043297 apical junction assembly; GO:0034329 cell junction assembly; GO:0007043 cell-cell junction assembly; GO:0016043 cellular component organization; GO:0051716 cellular response to stimulus; GO:0071822 protein complex subunit organization; GO:0034097 response to cytokine; GO:0071356 cellular response to tumor necrosis factor; GO:0071310 cellular re…	GO:0097708 intracellular vesicle; GO:0043229 intracellular organelle; GO:0016020 membrane; GO:0016324 apical plasma membrane; GO:0031410 cytoplasmic vesicle; GO:0030054 cell junction; GO:0071944 cell periphery; GO:0005737 cytoplasm; GO:0031982 vesicle; GO:0031224 intrinsic component of membrane; GO:0044424 intracellular part; GO:0005911 cell-cell junction; GO:0005623 cell; GO:0016021 integral com…	GO:0019904 protein domain specific binding; GO:0005515 protein binding; GO:0005488 binding;	K06088	OCLN; occludin	hsa04514 Cell adhesion molecules (CAMs); hsa04530 Tight junction; hsa04670 Leukocyte transendothelial migration; hsa05130 Pathogenic Escherichia coli infection; hsa05160 Hepatitis C	IPR008253; IPR010844; IPR020846;	Marvel domain; Occludin homology domain; Major facilitator superfamily domain;
Q13442	28 kDa heat- and acid-stable phosphoprotein OS=Homo sapiens OX=9606 GN=PDAP1 PE=1 SV=1	0.572	Down	0.011024	PDAP1	20.63	1.449	1.084	1.073			0.614	0.659	0.79			nucleus	GO:0050794 regulation of cellular process; GO:0044700 single organism signaling; GO:0045321 leukocyte activation; GO:0002283 neutrophil activation involved in immune response; GO:0002252 immune effector process; GO:0044699 single-organism process; GO:0050896 response to stimulus; GO:0051234 establishment of localization; GO:0007165 signal transduction; GO:0002275 myeloid cell activation involved …	GO:0043229 intracellular organelle; GO:0097708 intracellular vesicle; GO:0031410 cytoplasmic vesicle; GO:0005737 cytoplasm; GO:0044446 intracellular organelle part; GO:0031982 vesicle; GO:0044433 cytoplasmic vesicle part; GO:0012505 endomembrane system; GO:0044424 intracellular part; GO:0005623 cell; GO:0005576 extracellular region; GO:1904813 ficolin-1-rich granule lumen; GO:0044422 organelle pa…	GO:0097159 organic cyclic compound binding; GO:1901363 heterocyclic compound binding; GO:0003723 RNA binding; GO:0005488 binding; GO:0003676 nucleic acid binding;				IPR019380;	Casein kinase substrate, phosphoprotein PP28;
Q9ULZ2	Signal-transducing adaptor protein 1 OS=Homo sapiens OX=9606 GN=STAP1 PE=1 SV=1	0.54	Down	0.046256	STAP1	34.291	1.254	1.89	1.487			0.985	0.555	0.963			mitochondria	GO:0044700 single organism signaling; GO:0060627 regulation of vesicle-mediated transport; GO:0002694 regulation of leukocyte activation; GO:1903975 regulation of glial cell migration; GO:0060100 positive regulation of phagocytosis, engulfment; GO:0032270 positive regulation of cellular protein metabolic process; GO:0014013 regulation of gliogenesis; GO:0060491 regulation of cell projection assem…	GO:0043229 intracellular organelle; GO:0044446 intracellular organelle part; GO:0005737 cytoplasm; GO:0032991 macromolecular complex; GO:0031981 nuclear lumen; GO:0044424 intracellular part; GO:0005623 cell; GO:0044422 organelle part; GO:0005739 mitochondrion; GO:0031974 membrane-enclosed lumen; GO:0043231 intracellular membrane-bounded organelle; GO:0043226 organelle; GO:0005654 nucleoplasm; GO:…	GO:0005157 macrophage colony-stimulating factor receptor binding; GO:0030674 protein binding, bridging; GO:0005068 transmembrane receptor protein tyrosine kinase adaptor activity; GO:1990782 protein tyrosine kinase binding; GO:0005102 receptor binding; GO:0043167 ion binding; GO:0019901 protein kinase binding; GO:0005126 cytokine receptor binding; GO:0045309 protein phosphorylated amino acid bind…				IPR000980; IPR011993; IPR001849;	SH2 domain; PH domain-like; Pleckstrin homology domain;
Q8TBF2	Prostamide/prostaglandin F synthase OS=Homo sapiens OX=9606 GN=PRXL2B PE=1 SV=1	0.521	Down	0.043555	PRXL2B	21.222	1.415	1.41	1.908			1.194	0.592	0.681			extracellular	GO:0033559 unsaturated fatty acid metabolic process; GO:0016053 organic acid biosynthetic process; GO:1901568 fatty acid derivative metabolic process; GO:0044699 single-organism process; GO:0009058 biosynthetic process; GO:0044255 cellular lipid metabolic process; GO:0050896 response to stimulus; GO:0044237 cellular metabolic process; GO:0001516 prostaglandin biosynthetic process; GO:0008610 lipi…	GO:0043229 intracellular organelle; GO:0044421 extracellular region part; GO:0005783 endoplasmic reticulum; GO:0031982 vesicle; GO:0005737 cytoplasm; GO:0012505 endomembrane system; GO:0044424 intracellular part; GO:0005829 cytosol; GO:0005623 cell; GO:0005576 extracellular region; GO:0043231 intracellular membrane-bounded organelle; GO:0043226 organelle; GO:0070062 extracellular exosome; GO:0043…	GO:0016614 oxidoreductase activity, acting on CH-OH group of donors; GO:0016209 antioxidant activity; GO:0016616 oxidoreductase activity, acting on the CH-OH group of donors, NAD or NADP as acceptor; GO:0047017 prostaglandin-F synthase activity; GO:0003824 catalytic activity; GO:0016491 oxidoreductase activity;	K15717	K15717; prostamide/prostaglandin F2alpha synthase [EC:1.11.1.20]	hsa00590 Arachidonic acid metabolism; hsa01100 Metabolic pathways	IPR012336;	Thioredoxin-like fold;
Q9Y5K6	CD2-associated protein OS=Homo sapiens OX=9606 GN=CD2AP PE=1 SV=1	0.588	Down	0.03648	CD2AP	71.45	1.753	1.421	2.017	0.862	1.077	0.756	0.514	0.863	0.84	1.217	nucleus	GO:0060627 regulation of vesicle-mediated transport; GO:0044085 cellular component biogenesis; GO:0044700 single organism signaling; GO:0051674 localization of cell; GO:0007067 mitotic nuclear division; GO:0051241 negative regulation of multicellular organismal process; GO:0044699 single-organism process; GO:0032911 negative regulation of transforming growth factor beta1 production; GO:0001818 ne…	GO:0016020 membrane; GO:0044421 extracellular region part; GO:0031410 cytoplasmic vesicle; GO:0071944 cell periphery; GO:0030054 cell junction; GO:0031982 vesicle; GO:0005737 cytoplasm; GO:0032991 macromolecular complex; GO:0099512 supramolecular fiber; GO:0044424 intracellular part; GO:0099080 supramolecular complex; GO:0005623 cell; GO:0005911 cell-cell junction; GO:0044422 organelle part; GO:0…	GO:0005102 receptor binding; GO:0044877 macromolecular complex binding; GO:0005126 cytokine receptor binding; GO:0070851 growth factor receptor binding; GO:0005515 protein binding; GO:0005172 vascular endothelial growth factor receptor binding; GO:0017124 SH3 domain binding; GO:0050839 cell adhesion molecule binding; GO:0005200 structural constituent of cytoskeleton; GO:0005488 binding; GO:004529…	K13738	CD2AP; CD2-associated protein	hsa05100 Bacterial invasion of epithelial cells	IPR001452;	SH3 domain;
Q86WA9	Sodium-independent sulfate anion transporter OS=Homo sapiens OX=9606 GN=SLC26A11 PE=2 SV=2	0.496	Down	0.0155384	SLC26A11	65.298	1.566	1.404	2.408			0.932	0.851	0.882			plasma membrane	GO:0098661 inorganic anion transmembrane transport; GO:0065008 regulation of biological quality; GO:0034220 ion transmembrane transport; GO:0006885 regulation of pH; GO:0030003 cellular cation homeostasis; GO:0030641 regulation of cellular pH; GO:0030004 cellular monovalent inorganic cation homeostasis; GO:0044699 single-organism process; GO:0006821 chloride transport; GO:0055082 cellular chemica…	GO:0016020 membrane; GO:0044421 extracellular region part; GO:0005783 endoplasmic reticulum; GO:0031090 organelle membrane; GO:0071944 cell periphery; GO:0031982 vesicle; GO:0005737 cytoplasm; GO:0031224 intrinsic component of membrane; GO:0044424 intracellular part; GO:0005887 integral component of plasma membrane; GO:0005623 cell; GO:0044422 organelle part; GO:0031974 membrane-enclosed lumen; G…	GO:0005342 organic acid transmembrane transporter activity; GO:0005310 dicarboxylic acid transmembrane transporter activity; GO:0022804 active transmembrane transporter activity; GO:0015291 secondary active transmembrane transporter activity; GO:0015075 ion transmembrane transporter activity; GO:0022803 passive transmembrane transporter activity; GO:0015106 bicarbonate transmembrane transporter a…	K14708	SLC26A11; solute carrier family 26 (sodium-independent sulfate anion transporter), member 11		IPR011547; IPR002645;	SLC26A/SulP transporter domain; STAS domain;
P27701	CD82 antigen OS=Homo sapiens OX=9606 GN=CD82 PE=1 SV=1	3.497	Up	0.0033555	CD82	29.625	0.292	0.445	0.311			1.124	0.953	1.588			plasma membrane	GO:0050794 regulation of cellular process; GO:0044700 single organism signaling; GO:0051716 cellular response to stimulus; GO:0007165 signal transduction; GO:0050789 regulation of biological process; GO:0007154 cell communication; GO:0007166 cell surface receptor signaling pathway; GO:0044699 single-organism process; GO:0023052 signaling; GO:0050896 response to stimulus; GO:0009987 cellular proce…	GO:0016020 membrane; GO:0031226 intrinsic component of plasma membrane; GO:0044421 extracellular region part; GO:0071944 cell periphery; GO:0031982 vesicle; GO:0031224 intrinsic component of membrane; GO:0005887 integral component of plasma membrane; GO:0005623 cell; GO:0016021 integral component of membrane; GO:0005576 extracellular region; GO:0005886 plasma membrane; GO:0043226 organelle; GO:00…	GO:0005515 protein binding; GO:0005488 binding;	K06509	KAI1, CD82, TSPAN27; CD82 antigen	hsa04115 p53 signaling pathway	IPR008952;	Tetraspanin, EC2 domain;
Q92896	Golgi apparatus protein 1 OS=Homo sapiens OX=9606 GN=GLG1 PE=1 SV=2	2.494	Up	0.04682	GLG1	134.55	0.844	0.854	0.492	0.251	0.138	0.861	2.824	0.813	1.085	0.848	peroxisome	GO:0009968 negative regulation of signal transduction; GO:0051674 localization of cell; GO:0023051 regulation of signaling; GO:1903318 negative regulation of protein maturation; GO:0044699 single-organism process; GO:1903845 negative regulation of cellular response to transforming growth factor beta stimulus; GO:0010646 regulation of cell communication; GO:0032502 developmental process; GO:001046…	GO:0043229 intracellular organelle; GO:0016020 membrane; GO:0044421 extracellular region part; GO:0098588 bounding membrane of organelle; GO:0031090 organelle membrane; GO:0071944 cell periphery; GO:0005737 cytoplasm; GO:0044446 intracellular organelle part; GO:0031982 vesicle; GO:0000139 Golgi membrane; GO:0031224 intrinsic component of membrane; GO:0012505 endomembrane system; GO:0044424 intrac…	GO:0005515 protein binding; GO:0017134 fibroblast growth factor binding; GO:0019838 growth factor binding; GO:0005102 receptor binding; GO:0005488 binding;	K06816	GLG1, ESL1; golgi apparatus protein 1	hsa04514 Cell adhesion molecules (CAMs)
P10153	Non-secretory ribonuclease OS=Homo sapiens OX=9606 GN=RNASE2 PE=1 SV=2	0.582	Down	0.023384	RNASE2	18.354	1.738	2.162	1.166	2.392	1.478	0.669	1.196	0.723	1.349	1.262	extracellular	GO:0045321 leukocyte activation; GO:1903955 positive regulation of protein targeting to mitochondrion; GO:1903533 regulation of protein targeting; GO:0044699 single-organism process; GO:0044237 cellular metabolic process; GO:0010821 regulation of mitochondrion organization; GO:1903749 positive regulation of establishment of protein localization to mitochondrion; GO:0051234 establishment of locali…	GO:0034774 secretory granule lumen; GO:0044421 extracellular region part; GO:0031410 cytoplasmic vesicle; GO:0005737 cytoplasm; GO:0031982 vesicle; GO:0044433 cytoplasmic vesicle part; GO:0044424 intracellular part; GO:0035578 azurophil granule lumen; GO:0005623 cell; GO:0044422 organelle part; GO:0005775 vacuolar lumen; GO:0070062 extracellular exosome; GO:0031974 membrane-enclosed lumen; GO:003…	GO:0097159 organic cyclic compound binding; GO:1901363 heterocyclic compound binding; GO:0004522 ribonuclease A activity; GO:0003824 catalytic activity; GO:0005488 binding; GO:0016892 endoribonuclease activity, producing 3'-phosphomonoesters; GO:0003676 nucleic acid binding; GO:0016788 hydrolase activity, acting on ester bonds; GO:0004518 nuclease activity; GO:0004521 endoribonuclease activity; G…	K01168	RNASE1_2; pancreatic ribonuclease [EC:3.1.27.5]		IPR023412;	Ribonuclease A-domain;
Q9UGT4	Sushi domain-containing protein 2 OS=Homo sapiens OX=9606 GN=SUSD2 PE=1 SV=1	0.519	Down	0.040355	SUSD2	90.207	2.065	1.428	1.93	1.182	1.208	1.368	0.321	0.344	1.025	0.999	extracellular	GO:0051782 negative regulation of cell division; GO:0050794 regulation of cellular process; GO:1902807 negative regulation of cell cycle G1/S phase transition; GO:0045786 negative regulation of cell cycle; GO:1901988 negative regulation of cell cycle phase transition; GO:0016192 vesicle-mediated transport; GO:0002376 immune system process; GO:0048519 negative regulation of biological process; GO:…	GO:0016020 membrane; GO:0044421 extracellular region part; GO:0071944 cell periphery; GO:0031982 vesicle; GO:0031224 intrinsic component of membrane; GO:0005623 cell; GO:0016021 integral component of membrane; GO:0005576 extracellular region; GO:0005886 plasma membrane; GO:0043226 organelle; GO:0070062 extracellular exosome; GO:0044425 membrane part; GO:0044464 cell part; GO:1903561 extracellular…	GO:0060089 molecular transducer activity; GO:0004872 receptor activity; GO:0030247 polysaccharide binding; GO:0005488 binding; GO:0030246 carbohydrate binding; GO:0038024 cargo receptor activity; GO:0005515 protein binding; GO:0005044 scavenger receptor activity; GO:0001871 pattern binding;	K23820			IPR000436; IPR001846; IPR005533; IPR001212;	Sushi/SCR/CCP domain; von Willebrand factor, type D domain; AMOP domain; Somatomedin B domain;
P60900	Proteasome subunit alpha type-6 OS=Homo sapiens OX=9606 GN=PSMA6 PE=1 SV=1	2.276	Up	0.0078607	PSMA6	27.399	1.077	1.04	0.522	0.959	0.497	3.1	1.293	1.951	1.628	1.348	cytoplasm	GO:0044700 single organism signaling; GO:0065008 regulation of biological quality; GO:0032270 positive regulation of cellular protein metabolic process; GO:0002220 innate immune response activating cell surface receptor signaling pathway; GO:0007166 cell surface receptor signaling pathway; GO:0010608 posttranscriptional regulation of gene expression; GO:0051443 positive regulation of ubiquitin-pr…	GO:0044421 extracellular region part; GO:0030016 myofibril; GO:0031982 vesicle; GO:0000932 P-body; GO:0005737 cytoplasm; GO:0032991 macromolecular complex; GO:0099512 supramolecular fiber; GO:0044424 intracellular part; GO:0099080 supramolecular complex; GO:0005623 cell; GO:0044422 organelle part; GO:0036464 cytoplasmic ribonucleoprotein granule; GO:1905369 endopeptidase complex; GO:0043228 non-m…	GO:0003723 RNA binding; GO:0008233 peptidase activity; GO:1901265 nucleoside phosphate binding; GO:0043167 ion binding; GO:0016787 hydrolase activity; GO:0005515 protein binding; GO:1901363 heterocyclic compound binding; GO:0097159 organic cyclic compound binding; GO:0004175 endopeptidase activity; GO:0004298 threonine-type endopeptidase activity; GO:0070003 threonine-type peptidase activity; GO:…	K02730	PSMA6; 20S proteasome subunit alpha 1 [EC:3.4.25.1]	hsa03050 Proteasome	IPR029055; IPR000426;	Nucleophile aminohydrolases, N-terminal; Proteasome alpha-subunit, N-terminal domain;
P21266	Glutathione S-transferase Mu 3 OS=Homo sapiens OX=9606 GN=GSTM3 PE=1 SV=3	0.431	Down	0.022081	GSTM3	26.559	2.404	1.487	2.556	1.042	1.048	1.016	0.702	0.813	0.872	0.277	cytoplasm	GO:0006518 peptide metabolic process; GO:0043627 response to estrogen; GO:0051410 detoxification of nitrogen compound; GO:0048869 cellular developmental process; GO:0044699 single-organism process; GO:0009058 biosynthetic process; GO:0045446 endothelial cell differentiation; GO:0044237 cellular metabolic process; GO:0044272 sulfur compound biosynthetic process; GO:0008152 metabolic process; GO:19…	GO:0005929 cilium; GO:0043229 intracellular organelle; GO:0042995 cell projection; GO:0044421 extracellular region part; GO:0031982 vesicle; GO:0005737 cytoplasm; GO:0036126 sperm flagellum; GO:0097729 9+2 motile cilium; GO:0044424 intracellular part; GO:0044463 cell projection part; GO:0031514 motile cilium; GO:0005623 cell; GO:0005829 cytosol; GO:0005576 extracellular region; GO:0044422 organel…	GO:0046983 protein dimerization activity; GO:0043167 ion binding; GO:0005515 protein binding; GO:0033218 amide binding; GO:0043295 glutathione binding; GO:1900750 oligopeptide binding; GO:1901681 sulfur compound binding; GO:0004364 glutathione transferase activity; GO:0072341 modified amino acid binding; GO:0042802 identical protein binding; GO:0042277 peptide binding; GO:0003824 catalytic activi…	K00799	GST, gst; glutathione S-transferase [EC:2.5.1.18]	hsa00480 Glutathione metabolism; hsa00980 Metabolism of xenobiotics by cytochrome P450; hsa00982 Drug metabolism - cytochrome P450; hsa00983 Drug metabolism - other enzymes; hsa01100 Metabolic pathways; hsa01524 Platinum drug resistance; hsa05200 Pathways in cancer; hsa05204 Chemical carcinogenesis; hsa05225 Hepatocellular carcinoma; hsa05418 Fluid shear stress and atherosclerosis	IPR010987; IPR004046; IPR004045; IPR012336;	Glutathione S-transferase, C-terminal-like; Glutathione S-transferase, C-terminal; Glutathione S-transferase, N-terminal; Thioredoxin-like fold;
Q6ZVX7	F-box only protein 50 OS=Homo sapiens OX=9606 GN=NCCRP1 PE=1 SV=1	0.423	Down	0.0162627	NCCRP1	30.847	1.918	2.284	2.748			1.326	0.67	0.942			extracellular	GO:0050794 regulation of cellular process; GO:0050789 regulation of biological process; GO:0042127 regulation of cell proliferation; GO:0048522 positive regulation of cellular process; GO:0048518 positive regulation of biological process; GO:0065007 biological regulation; GO:0008284 positive regulation of cell proliferation;	GO:0070062 extracellular exosome; GO:0043226 organelle; GO:0044421 extracellular region part; GO:0044464 cell part; GO:0005622 intracellular; GO:0005737 cytoplasm; GO:0031982 vesicle; GO:1903561 extracellular vesicle; GO:0044424 intracellular part; GO:0005623 cell; GO:0043227 membrane-bounded organelle; GO:0005576 extracellular region; GO:0043230 extracellular organelle;					IPR007397; IPR008979;	F-box associated (FBA) domain; Galactose-binding domain-like;
Q86XT2	Vacuolar protein sorting-associated protein 37D OS=Homo sapiens OX=9606 GN=VPS37D PE=1 SV=2	0.478	Down	0.041436	VPS37D	27.729	3.254	1.149	2.573	0.908	1.38	1.059	0.67	0.746	1.156	0.798	nucleus	GO:0044085 cellular component biogenesis; GO:1902579 multi-organism localization; GO:0046907 intracellular transport; GO:0016043 cellular component organization; GO:0010256 endomembrane system organization; GO:0019068 virion assembly; GO:0019058 viral life cycle; GO:1902581 multi-organism cellular localization; GO:1902592 multi-organism membrane budding; GO:0044764 multi-organism cellular process…	GO:0016020 membrane; GO:0044421 extracellular region part; GO:0031410 cytoplasmic vesicle; GO:0031090 organelle membrane; GO:0098796 membrane protein complex; GO:0005737 cytoplasm; GO:0031982 vesicle; GO:0044433 cytoplasmic vesicle part; GO:0032991 macromolecular complex; GO:0044424 intracellular part; GO:0005623 cell; GO:0044422 organelle part; GO:0070062 extracellular exosome; GO:0036452 ESCRT …		K12185	VPS37; ESCRT-I complex subunit VPS37	hsa04144 Endocytosis	IPR009851;	Modifier of rudimentary, Modr;
O43795	Unconventional myosin-Ib OS=Homo sapiens OX=9606 GN=MYO1B PE=1 SV=3	0.548	Down	0.020681	MYO1B	131.98	1.179	1.067	1.682	0.968	2.4	0.942	0.634	1.04	0.744	0.641	cytoplasm	GO:0044085 cellular component biogenesis; GO:0030048 actin filament-based movement; GO:0016043 cellular component organization; GO:0016192 vesicle-mediated transport; GO:0044763 single-organism cellular process; GO:0048193 Golgi vesicle transport; GO:0007015 actin filament organization; GO:0044699 single-organism process; GO:0051017 actin filament bundle assembly; GO:0051234 establishment of loca…	GO:0016020 membrane; GO:0044421 extracellular region part; GO:0098862 cluster of actin-based cell projections; GO:0005903 brush border; GO:0031410 cytoplasmic vesicle; GO:0031090 organelle membrane; GO:0071944 cell periphery; GO:0005737 cytoplasm; GO:0031982 vesicle; GO:0044433 cytoplasmic vesicle part; GO:0032991 macromolecular complex; GO:0099512 supramolecular fiber; GO:0044424 intracellular p…	GO:0051015 actin filament binding; GO:0003774 motor activity; GO:1901265 nucleoside phosphate binding; GO:0016817 hydrolase activity, acting on acid anhydrides; GO:0016787 hydrolase activity; GO:0005515 protein binding; GO:0016887 ATPase activity; GO:1902936 phosphatidylinositol bisphosphate binding; GO:0097159 organic cyclic compound binding; GO:1901363 heterocyclic compound binding; GO:0016462 …	K10356	MYO1; myosin I	hsa05130 Pathogenic Escherichia coli infection	IPR010926; IPR027417; IPR001609;	Class I myosin tail homology domain; P-loop containing nucleoside triphosphate hydrolase; Myosin head, motor domain;
P08962	CD63 antigen OS=Homo sapiens OX=9606 GN=CD63 PE=1 SV=2	2.864	Up	0.000156263	CD63	25.636	0.589	0.461	0.58	0.595	0.4	1.963	1.625	1.005	1.793	1.133	plasma membrane	GO:0060627 regulation of vesicle-mediated transport; GO:0021700 developmental maturation; GO:0045321 leukocyte activation; GO:0051674 localization of cell; GO:0002092 positive regulation of receptor internalization; GO:0023051 regulation of signaling; GO:0048869 cellular developmental process; GO:0044699 single-organism process; GO:0015031 protein transport; GO:0051234 establishment of localizati…	GO:0016020 membrane; GO:0042827 platelet dense granule; GO:0044421 extracellular region part; GO:0031090 organelle membrane; GO:0005737 cytoplasm; GO:0031088 platelet dense granule membrane; GO:0044433 cytoplasmic vesicle part; GO:0005887 integral component of plasma membrane; GO:0005623 cell; GO:0044422 organelle part; GO:0005765 lysosomal membrane; GO:0070062 extracellular exosome; GO:0031902 l…	GO:0005515 protein binding; GO:0005488 binding;	K06497	CD63, MLA1, TSPAN30; CD63 antigen	hsa04142 Lysosome; hsa05205 Proteoglycans in cancer	IPR008952;	Tetraspanin, EC2 domain;
P23284	Peptidyl-prolyl cis-trans isomerase B OS=Homo sapiens OX=9606 GN=PPIB PE=1 SV=2	2.041	Up	0.020702	PPIB	23.742	0.616	1.522	0.37	0.963	0.539	1.606	1.051	2.432	1.579	1.516	extracellular	GO:0065008 regulation of biological quality; GO:0044827 modulation by host of viral genome replication; GO:0061077 chaperone-mediated protein folding; GO:0044699 single-organism process; GO:0035821 modification of morphology or physiology of other organism; GO:0044237 cellular metabolic process; GO:0045927 positive regulation of growth; GO:0006457 protein folding; GO:0008152 metabolic process; GO…	GO:0005790 smooth endoplasmic reticulum; GO:0016020 membrane; GO:0044421 extracellular region part; GO:0005783 endoplasmic reticulum; GO:0031410 cytoplasmic vesicle; GO:0030054 cell junction; GO:0031982 vesicle; GO:0005737 cytoplasm; GO:0032991 macromolecular complex; GO:0044424 intracellular part; GO:0005623 cell; GO:0044422 organelle part; GO:0048770 pigment granule; GO:0070062 extracellular ex…	GO:0097159 organic cyclic compound binding; GO:1901363 heterocyclic compound binding; GO:0003723 RNA binding; GO:0003755 peptidyl-prolyl cis-trans isomerase activity; GO:0016853 isomerase activity; GO:0003824 catalytic activity; GO:0005488 binding; GO:0044877 macromolecular complex binding; GO:0003676 nucleic acid binding; GO:0005515 protein binding; GO:0051082 unfolded protein binding; GO:007006…	K03768	PPIB, ppiB; peptidyl-prolyl cis-trans isomerase B (cyclophilin B) [EC:5.2.1.8]		IPR002130; IPR029000;	Cyclophilin-type peptidyl-prolyl cis-trans isomerase domain; Cyclophilin-like domain;
P01111	GTPase NRas OS=Homo sapiens OX=9606 GN=NRAS PE=1 SV=1	0.549	Down	0.0077237	NRAS	21.229				1.737	1.811				0.927	1.022	cytoplasm	GO:0044700 single organism signaling; GO:0045321 leukocyte activation; GO:0002220 innate immune response activating cell surface receptor signaling pathway; GO:0007166 cell surface receptor signaling pathway; GO:0032989 cellular component morphogenesis; GO:0031347 regulation of defense response; GO:0044237 cellular metabolic process; GO:0009605 response to external stimulus; GO:0008152 metabolic …	GO:0016020 membrane; GO:0044421 extracellular region part; GO:0031410 cytoplasmic vesicle; GO:0031090 organelle membrane; GO:0071944 cell periphery; GO:0031982 vesicle; GO:0005737 cytoplasm; GO:0044433 cytoplasmic vesicle part; GO:0044424 intracellular part; GO:0005623 cell; GO:0044422 organelle part; GO:0070821 tertiary granule membrane; GO:0070062 extracellular exosome; GO:0044464 cell part; GO…	GO:1901265 nucleoside phosphate binding; GO:0044877 macromolecular complex binding; GO:0001882 nucleoside binding; GO:0043167 ion binding; GO:0005515 protein binding; GO:0000166 nucleotide binding; GO:1901363 heterocyclic compound binding; GO:0097159 organic cyclic compound binding; GO:0032549 ribonucleoside binding; GO:0097367 carbohydrate derivative binding; GO:0032553 ribonucleotide binding; G…	K07828	NRAS; GTPase NRas	hsa01521 EGFR tyrosine kinase inhibitor resistance; hsa01522 Endocrine resistance; hsa04010 MAPK signaling pathway; hsa04012 ErbB signaling pathway; hsa04014 Ras signaling pathway; hsa04015 Rap1 signaling pathway; hsa04062 Chemokine signaling pathway; hsa04068 FoxO signaling pathway; hsa04071 Sphingolipid signaling pathway; hsa04072 Phospholipase D signaling pathway; hsa04137 Mitophagy - animal; …	IPR005225; IPR027417;	Small GTP-binding protein domain; P-loop containing nucleoside triphosphate hydrolase;
A0A140G945	Alpha-crystallin A2 chain OS=Homo sapiens OX=9606 GN=CRYAA2 PE=1 SV=1	0.368	Down	0.038483	CRYAA2	19.909	1.985	2.698	1.585	0.888	0.937	0.919	1.093	0.286	0.098	0.582	nucleus			GO:0005212 structural constituent of eye lens; GO:0046872 metal ion binding; GO:0043169 cation binding; GO:0005198 structural molecule activity; GO:0005488 binding; GO:0043167 ion binding;	K09541	CRYAA; crystallin, alpha A	hsa04141 Protein processing in endoplasmic reticulum	IPR002068; IPR003090; IPR008978;	Alpha crystallin/Hsp20 domain; Alpha-crystallin, N-terminal; HSP20-like chaperone;
Q07960	Rho GTPase-activating protein 1 OS=Homo sapiens OX=9606 GN=ARHGAP1 PE=1 SV=1	0.43	Down	0.032878	ARHGAP1	50.435	0.982	0.87	2.642	1.567	1.334	2.352	0.205	0.101	0.232	0.289	cytoplasm	GO:0050794 regulation of cellular process; GO:0044700 single organism signaling; GO:0023051 regulation of signaling; GO:0044699 single-organism process; GO:0050896 response to stimulus; GO:0007165 signal transduction; GO:0010646 regulation of cell communication; GO:0007154 cell communication; GO:0051345 positive regulation of hydrolase activity; GO:0023056 positive regulation of signaling; GO:004…	GO:0044421 extracellular region part; GO:0005737 cytoplasm; GO:0031982 vesicle; GO:0044424 intracellular part; GO:0005829 cytosol; GO:0005623 cell; GO:0005576 extracellular region; GO:0043226 organelle; GO:0070062 extracellular exosome; GO:0005622 intracellular; GO:0044464 cell part; GO:1903561 extracellular vesicle; GO:0048471 perinuclear region of cytoplasm; GO:0043227 membrane-bounded organell…	GO:0030674 protein binding, bridging; GO:0060589 nucleoside-triphosphatase regulator activity; GO:0030695 GTPase regulator activity; GO:0005515 protein binding; GO:0098772 molecular function regulator; GO:0017124 SH3 domain binding; GO:0005070 SH3/SH2 adaptor activity; GO:0050839 cell adhesion molecule binding; GO:0035591 signaling adaptor activity; GO:0030234 enzyme regulator activity; GO:000548…	K18470	ARHGAP1, CDC42GAP; Rho GTPase-activating protein 1		IPR001251; IPR008936; IPR000198;	CRAL-TRIO lipid binding domain; Rho GTPase activation protein; Rho GTPase-activating protein domain;
P13716	Delta-aminolevulinic acid dehydratase OS=Homo sapiens OX=9606 GN=ALAD PE=1 SV=1	2.345	Up	0.049576	ALAD	36.294				0.474	0.705				1.431	1.334	mitochondria	GO:0044085 cellular component biogenesis; GO:0045321 leukocyte activation; GO:0046685 response to arsenic-containing substance; GO:0071345 cellular response to cytokine stimulus; GO:0044237 cellular metabolic process; GO:0009607 response to biotic stimulus; GO:0009605 response to external stimulus; GO:0008152 metabolic process; GO:0009635 response to herbicide; GO:0065003 macromolecular complex a…	GO:0034774 secretory granule lumen; GO:0005615 extracellular space; GO:0044421 extracellular region part; GO:0031410 cytoplasmic vesicle; GO:0031982 vesicle; GO:0005737 cytoplasm; GO:0044433 cytoplasmic vesicle part; GO:0044424 intracellular part; GO:0005623 cell; GO:1904813 ficolin-1-rich granule lumen; GO:0044422 organelle part; GO:0070062 extracellular exosome; GO:0101002 ficolin-1-rich granul…	GO:0042802 identical protein binding; GO:0046914 transition metal ion binding; GO:0003824 catalytic activity; GO:0005488 binding; GO:0043167 ion binding; GO:0016829 lyase activity; GO:0046872 metal ion binding; GO:0043169 cation binding; GO:0016836 hydro-lyase activity; GO:0005515 protein binding; GO:0008270 zinc ion binding; GO:0032791 lead ion binding; GO:0004655 porphobilinogen synthase activi…	K01698	hemB, ALAD; porphobilinogen synthase [EC:4.2.1.24]	hsa00860 Porphyrin and chlorophyll metabolism; hsa01100 Metabolic pathways	IPR013785;	Aldolase-type TIM barrel;
A0A075B6I9	Immunoglobulin lambda variable 7-46 OS=Homo sapiens OX=9606 GN=IGLV7-46 PE=3 SV=4	3.397	Up	0.048717	IGLV7-46	12.468	0.468	0.566	0.703	0.396	0.641	0.881	0.836	3.016	0.834	3.857	extracellular	GO:0002376 immune system process; GO:0006955 immune response; GO:0050896 response to stimulus; GO:0002377 immunoglobulin production; GO:0002440 production of molecular mediator of immune response; GO:0002250 adaptive immune response;	GO:0016020 membrane; GO:0005615 extracellular space; GO:0044421 extracellular region part; GO:0044464 cell part; GO:0071944 cell periphery; GO:0005623 cell; GO:0005576 extracellular region; GO:0005886 plasma membrane;	GO:0005515 protein binding; GO:0003823 antigen binding; GO:0005488 binding;				IPR007110; IPR013783; IPR003599; IPR013106;	Immunoglobulin-like domain; Immunoglobulin-like fold; Immunoglobulin subtype; Immunoglobulin V-set domain;
P02686	Myelin basic protein OS=Homo sapiens OX=9606 GN=MBP PE=1 SV=3	0.067	Down	0.0087438	MBP	33.117	2.198	2.707	1.971	8.832	15.146	0.789	0.351	0.108			nucleus	GO:0044700 single organism signaling; GO:0016043 cellular component organization; GO:0044707 single-multicellular organism process; GO:0007272 ensheathment of neurons; GO:0007420 brain development; GO:0008366 axon ensheathment; GO:0044699 single-organism process; GO:0050896 response to stimulus; GO:0050877 neurological system process; GO:0048857 neural nucleus development; GO:0021762 substantia n…	GO:0043229 intracellular organelle; GO:0016020 membrane; GO:0042995 cell projection; GO:0071944 cell periphery; GO:0043025 neuronal cell body; GO:0033269 internode region of axon; GO:0044424 intracellular part; GO:0044463 cell projection part; GO:0005623 cell; GO:0033267 axon part; GO:0005886 plasma membrane; GO:0043226 organelle; GO:0043231 intracellular membrane-bounded organelle; GO:0030424 ax…	GO:0002020 protease binding; GO:0005515 protein binding; GO:0005198 structural molecule activity; GO:0019899 enzyme binding; GO:0005488 binding; GO:0019911 structural constituent of myelin sheath;	K17269	MBP; myelin basic protein
Q14624	Inter-alpha-trypsin inhibitor heavy chain H4 OS=Homo sapiens OX=9606 GN=ITIH4 PE=1 SV=4	6.063	Up	2.2768e-06	ITIH4	103.36	0.172	0.213		0.329	0.303	1.607	1.558	1.785	1.329	1.428	extracellular	GO:0050794 regulation of cellular process; GO:0010951 negative regulation of endopeptidase activity; GO:0060255 regulation of macromolecule metabolic process; GO:0002576 platelet degranulation; GO:0044699 single-organism process; GO:0031324 negative regulation of cellular metabolic process; GO:0048523 negative regulation of cellular process; GO:0048519 negative regulation of biological process; G…	GO:0034774 secretory granule lumen; GO:0016020 membrane; GO:0042827 platelet dense granule; GO:0005615 extracellular space; GO:0044421 extracellular region part; GO:0031410 cytoplasmic vesicle; GO:0071944 cell periphery; GO:0031982 vesicle; GO:0005737 cytoplasm; GO:0044433 cytoplasmic vesicle part; GO:0044424 intracellular part; GO:0005623 cell; GO:0044422 organelle part; GO:0031974 membrane-encl…	GO:0004867 serine-type endopeptidase inhibitor activity; GO:0030234 enzyme regulator activity; GO:0005488 binding; GO:0030414 peptidase inhibitor activity; GO:0061134 peptidase regulator activity; GO:0005515 protein binding; GO:0061135 endopeptidase regulator activity; GO:0004857 enzyme inhibitor activity; GO:0098772 molecular function regulator; GO:0004866 endopeptidase inhibitor activity;				IPR010600; IPR013694; IPR002035;	Inter-alpha-trypsin inhibitor heavy chain, C-terminal; VIT domain; von Willebrand factor, type A;
P52788	Spermine synthase OS=Homo sapiens OX=9606 GN=SMS PE=1 SV=2	1.524	Up	0.0143629	SMS	41.268	1.048	0.726	0.677	0.738	0.615	1.081	1.512	0.815	1.185	1.206	cytoplasm	GO:0009066 aspartate family amino acid metabolic process; GO:0097164 ammonium ion metabolic process; GO:0044699 single-organism process; GO:0006597 spermine biosynthetic process; GO:0009058 biosynthetic process; GO:1901566 organonitrogen compound biosynthetic process; GO:0044237 cellular metabolic process; GO:0000096 sulfur amino acid metabolic process; GO:0006576 cellular biogenic amine metaboli…	GO:0070062 extracellular exosome; GO:0043226 organelle; GO:0044421 extracellular region part; GO:0044464 cell part; GO:0005622 intracellular; GO:0005737 cytoplasm; GO:0031982 vesicle; GO:1903561 extracellular vesicle; GO:0044424 intracellular part; GO:0005623 cell; GO:0005829 cytosol; GO:0043227 membrane-bounded organelle; GO:0005576 extracellular region; GO:0043230 extracellular organelle; GO:00…	GO:0016765 transferase activity, transferring alkyl or aryl (other than methyl) groups; GO:0016768 spermine synthase activity; GO:0003824 catalytic activity; GO:0016740 transferase activity;	K00802	SMS; spermine synthase [EC:2.5.1.22]	hsa00270 Cysteine and methionine metabolism; hsa00330 Arginine and proline metabolism; hsa00480 Glutathione metabolism; hsa01100 Metabolic pathways	IPR029063; IPR030374;	S-adenosyl-L-methionine-dependent methyltransferase; Polyamine biosynthesis domain;
P29966	Myristoylated alanine-rich C-kinase substrate OS=Homo sapiens OX=9606 GN=MARCKS PE=1 SV=4	0.4	Down	0.049256	MARCKS	31.554	1.214	5.402	2.175	1.03	2.484	1.891	0.681	0.765	0.987	0.595	nucleus	GO:0050794 regulation of cellular process; GO:0090087 regulation of peptide transport; GO:0065008 regulation of biological quality; GO:0051049 regulation of transport; GO:0050796 regulation of insulin secretion; GO:0023051 regulation of signaling; GO:0051046 regulation of secretion; GO:1903530 regulation of secretion by cell; GO:0070201 regulation of establishment of protein localization; GO:0002…	GO:0016020 membrane; GO:0044421 extracellular region part; GO:0005938 cell cortex; GO:0030054 cell junction; GO:0071944 cell periphery; GO:0005737 cytoplasm; GO:0099568 cytoplasmic region; GO:0031982 vesicle; GO:0044424 intracellular part; GO:0042585 germinal vesicle; GO:0005623 cell; GO:0044422 organelle part; GO:0043228 non-membrane-bounded organelle; GO:0070062 extracellular exosome; GO:000585…	GO:0051015 actin filament binding; GO:0008092 cytoskeletal protein binding; GO:0005488 binding; GO:0019901 protein kinase binding; GO:0044877 macromolecular complex binding; GO:0003779 actin binding; GO:0005080 protein kinase C binding; GO:0005515 protein binding; GO:0019900 kinase binding; GO:0005516 calmodulin binding; GO:0019899 enzyme binding; GO:0032403 protein complex binding;	K12561	MARCKS; myristoylated alanine-rich C-kinase substrate	hsa04666 Fc gamma R-mediated phagocytosis; hsa05206 MicroRNAs in cancer
O95954	Formimidoyltransferase-cyclodeaminase OS=Homo sapiens OX=9606 GN=FTCD PE=1 SV=2	2.129	Up	0.049015	FTCD	58.926	0.274	0.818	0.493	0.454	0.405	0.414	1.203	1.528	0.662	1.397	nucleus	GO:0016043 cellular component organization; GO:0043648 dicarboxylic acid metabolic process; GO:1901606 alpha-amino acid catabolic process; GO:0006725 cellular aromatic compound metabolic process; GO:0052803 imidazole-containing compound metabolic process; GO:0044699 single-organism process; GO:0035999 tetrahydrofolate interconversion; GO:0044237 cellular metabolic process; GO:0019556 histidine ca…	GO:0005790 smooth endoplasmic reticulum; GO:0016020 membrane; GO:0042175 nuclear outer membrane-endoplasmic reticulum membrane network; GO:0044421 extracellular region part; GO:0005783 endoplasmic reticulum; GO:0044450 microtubule organizing center part; GO:0031090 organelle membrane; GO:0031982 vesicle; GO:0005737 cytoplasm; GO:0044424 intracellular part; GO:0005623 cell; GO:0044422 organelle pa…	GO:0030412 formimidoyltetrahydrofolate cyclodeaminase activity; GO:0019842 vitamin binding; GO:0043167 ion binding; GO:0015631 tubulin binding; GO:0005542 folic acid binding; GO:0043177 organic acid binding; GO:0016741 transferase activity, transferring one-carbon groups; GO:0016829 lyase activity; GO:0005515 protein binding; GO:0033218 amide binding; GO:0030407 formimidoyltransferase activity; G…	K13990	FTCD; glutamate formiminotransferase / formiminotetrahydrofolate cyclodeaminase [EC:2.1.2.5 4.3.1.4]	hsa00340 Histidine metabolism; hsa00670 One carbon pool by folate; hsa01100 Metabolic pathways	IPR012886; IPR004227; IPR013802; IPR007044; IPR022384;	Formiminotransferase, N-terminal subdomain; Formiminotransferase catalytic domain; Formiminotransferase, C-terminal subdomain; Cyclodeaminase/cyclohydrolase; Formiminotransferase subdomain;
P02763	Alpha-1-acid glycoprotein 1 OS=Homo sapiens OX=9606 GN=ORM1 PE=1 SV=1	3.968	Up	0.005176	ORM1	23.511	0.401	0.453	0.272	0.572	0.331	3.595	1.585	0.765	0.698	1.409	extracellular	GO:1903555 regulation of tumor necrosis factor superfamily cytokine production; GO:0045321 leukocyte activation; GO:0002283 neutrophil activation involved in immune response; GO:0032715 negative regulation of interleukin-6 production; GO:0002252 immune effector process; GO:0032680 regulation of tumor necrosis factor production; GO:0002576 platelet degranulation; GO:0044699 single-organism process…	GO:0034774 secretory granule lumen; GO:1904724 tertiary granule lumen; GO:0005615 extracellular space; GO:0044421 extracellular region part; GO:0031410 cytoplasmic vesicle; GO:0005737 cytoplasm; GO:0031982 vesicle; GO:0044433 cytoplasmic vesicle part; GO:0044424 intracellular part; GO:0005623 cell; GO:0044422 organelle part; GO:0070062 extracellular exosome; GO:0031974 membrane-enclosed lumen; GO…	GO:0005515 protein binding; GO:0005488 binding;	K17308	ORM1, AGP1; alpha-1-acid glycoprotein 1		IPR000566; IPR012674; IPR011038;	Lipocalin/cytosolic fatty-acid binding domain; Calycin; Calycin-like;
P13861	cAMP-dependent protein kinase type II-alpha regulatory subunit OS=Homo sapiens OX=9606 GN=PRKAR2A PE=1 SV=2	0.52	Down	0.00031843	PRKAR2A	45.518	1.613	1.786	1.557	2.175	2.117	0.974	1.167	0.703	0.911	1.053	cytoplasm	GO:0044700 single organism signaling; GO:0007596 blood coagulation; GO:0065008 regulation of biological quality; GO:0032270 positive regulation of cellular protein metabolic process; GO:0044699 single-organism process; GO:0048871 multicellular organismal homeostasis; GO:0031400 negative regulation of protein modification process; GO:0009611 response to wounding; GO:0071900 regulation of protein s…	GO:0016020 membrane; GO:0044421 extracellular region part; GO:0061695 transferase complex, transferring phosphorus-containing groups; GO:0098857 membrane microdomain; GO:0030054 cell junction; GO:0071944 cell periphery; GO:0031982 vesicle; GO:0005737 cytoplasm; GO:0032991 macromolecular complex; GO:0044424 intracellular part; GO:0005623 cell; GO:1902911 protein kinase complex; GO:0044422 organell…	GO:0030291 protein serine/threonine kinase inhibitor activity; GO:0051018 protein kinase A binding; GO:1901265 nucleoside phosphate binding; GO:0031625 ubiquitin protein ligase binding; GO:0019901 protein kinase binding; GO:0004860 protein kinase inhibitor activity; GO:0005515 protein binding; GO:0019207 kinase regulator activity; GO:0004857 enzyme inhibitor activity; GO:0098772 molecular functio…	K04739	PRKAR; cAMP-dependent protein kinase regulator	hsa04910 Insulin signaling pathway	IPR000595; IPR003117; IPR018490; IPR014710;	Cyclic nucleotide-binding domain; cAMP-dependent protein kinase regulatory subunit, dimerization-anchoring domain; Cyclic nucleotide-binding-like; RmlC-like jelly roll fold;
P62328	Thymosin beta-4 OS=Homo sapiens OX=9606 GN=TMSB4X PE=1 SV=2	0.095	Down	3.7461e-05	TMSB4X	5.0526	4.237	2.952	3.008	10.093	4.114	0.807	0.362	0.442	0.3	0.4	nucleus	GO:0050794 regulation of cellular process; GO:0016043 cellular component organization; GO:0002576 platelet degranulation; GO:0007015 actin filament organization; GO:0044699 single-organism process; GO:0051234 establishment of localization; GO:0030036 actin cytoskeleton organization; GO:1902578 single-organism localization; GO:2000145 regulation of cell motility; GO:0032879 regulation of localizat…	GO:0034774 secretory granule lumen; GO:0005615 extracellular space; GO:0044421 extracellular region part; GO:0031410 cytoplasmic vesicle; GO:0031982 vesicle; GO:0005737 cytoplasm; GO:0044433 cytoplasmic vesicle part; GO:0044424 intracellular part; GO:0005623 cell; GO:0044422 organelle part; GO:0043228 non-membrane-bounded organelle; GO:0031974 membrane-enclosed lumen; GO:0005856 cytoskeleton; GO:…	GO:0003779 actin binding; GO:0097159 organic cyclic compound binding; GO:1901363 heterocyclic compound binding; GO:0003723 RNA binding; GO:0005515 protein binding; GO:0008092 cytoskeletal protein binding; GO:0003785 actin monomer binding; GO:0005488 binding; GO:0003676 nucleic acid binding;	K05764	TMSB4; thymosin, beta 4	hsa04810 Regulation of actin cytoskeleton
Q8TF74	WAS/WASL-interacting protein family member 2 OS=Homo sapiens OX=9606 GN=WIPF2 PE=1 SV=1	0.334	Down	0.00101715	WIPF2	46.288	1.776	1.504	1.82	2.644	2.916	0.756	0.483	0.394	0.817	1.107	nucleus	GO:0050794 regulation of cellular process; GO:0044700 single organism signaling; GO:0002429 immune response-activating cell surface receptor signaling pathway; GO:0007166 cell surface receptor signaling pathway; GO:0002252 immune effector process; GO:0038094 Fc-gamma receptor signaling pathway; GO:0044699 single-organism process; GO:0050896 response to stimulus; GO:0051234 establishment of locali…	GO:0005856 cytoskeleton; GO:0043226 organelle; GO:0043229 intracellular organelle; GO:0043232 intracellular non-membrane-bounded organelle; GO:0044464 cell part; GO:0005622 intracellular; GO:0005737 cytoplasm; GO:0044424 intracellular part; GO:0005829 cytosol; GO:0005623 cell; GO:0044444 cytoplasmic part; GO:0043228 non-membrane-bounded organelle;	GO:0003779 actin binding; GO:0005515 protein binding; GO:0008092 cytoskeletal protein binding; GO:0005488 binding;	K19475	WIPF; WAS/WASL-interacting protein	hsa04144 Endocytosis; hsa05130 Pathogenic Escherichia coli infection; hsa05135 Yersinia infection	IPR003124;	WH2 domain;
O95433	Activator of 90 kDa heat shock protein ATPase homolog 1 OS=Homo sapiens OX=9606 GN=AHSA1 PE=1 SV=1	0.516	Down	0.0116843	AHSA1	38.274	1.641	1.988	1.221			0.801	0.894	0.809			cytoplasm	GO:0006950 response to stress; GO:0051336 regulation of hydrolase activity; GO:0043462 regulation of ATPase activity; GO:0051345 positive regulation of hydrolase activity; GO:0050790 regulation of catalytic activity; GO:0044093 positive regulation of molecular function; GO:0065009 regulation of molecular function; GO:0032781 positive regulation of ATPase activity; GO:0050896 response to stimulus;…	GO:0043229 intracellular organelle; GO:0005783 endoplasmic reticulum; GO:0044421 extracellular region part; GO:0005737 cytoplasm; GO:0031982 vesicle; GO:0012505 endomembrane system; GO:0044424 intracellular part; GO:0005829 cytosol; GO:0005623 cell; GO:0005576 extracellular region; GO:0043226 organelle; GO:0070062 extracellular exosome; GO:0043231 intracellular membrane-bounded organelle; GO:0005…	GO:0050839 cell adhesion molecule binding; GO:0001671 ATPase activator activity; GO:0030234 enzyme regulator activity; GO:0051087 chaperone binding; GO:0060589 nucleoside-triphosphatase regulator activity; GO:0005488 binding; GO:0045296 cadherin binding; GO:0005515 protein binding; GO:0060590 ATPase regulator activity; GO:0098772 molecular function regulator; GO:0008047 enzyme activator activity;				IPR015310; IPR023393;	Activator of Hsp90 ATPase, N-terminal; START-like domain;
Q9Y5X3	Sorting nexin-5 OS=Homo sapiens OX=9606 GN=SNX5 PE=1 SV=1	1.664	Up	0.042164	SNX5	46.816	0.699	0.843	0.456	0.807	0.696	1.018	2.018	0.825	0.842	1.122	nucleus	GO:0050794 regulation of cellular process; GO:0016043 cellular component organization; GO:0046907 intracellular transport; GO:0015031 protein transport; GO:0051234 establishment of localization; GO:0051649 establishment of localization in cell; GO:0006886 intracellular protein transport; GO:0016482 cytosolic transport; GO:0008104 protein localization; GO:0033036 macromolecule localization; GO:003…	GO:0016020 membrane; GO:0030904 retromer complex; GO:0031090 organelle membrane; GO:0019898 extrinsic component of membrane; GO:0031410 cytoplasmic vesicle; GO:0071944 cell periphery; GO:0098796 membrane protein complex; GO:0005737 cytoplasm; GO:0031982 vesicle; GO:0044433 cytoplasmic vesicle part; GO:0032991 macromolecular complex; GO:0044424 intracellular part; GO:0031234 extrinsic component of…	GO:0050839 cell adhesion molecule binding; GO:0034452 dynactin binding; GO:0008092 cytoskeletal protein binding; GO:0046982 protein heterodimerization activity; GO:0005488 binding; GO:0046983 protein dimerization activity; GO:0035091 phosphatidylinositol binding; GO:0005543 phospholipid binding; GO:0043167 ion binding; GO:0045296 cadherin binding; GO:0008289 lipid binding; GO:0043168 anion bindin…	K17920	SNX5_6_32; sorting nexin-5/6/32	hsa04144 Endocytosis	IPR015404; IPR001683;	Sorting nexin Vps5-like, C-terminal; Phox homologous domain;
P49368	T-complex protein 1 subunit gamma OS=Homo sapiens OX=9606 GN=CCT3 PE=1 SV=4	1.833	Up	0.0154391	CCT3	60.533	0.55	1.097	0.53	0.993	1.029	2.255	1.226	1.684	1.125	1.408	mitochondria	GO:0044085 cellular component biogenesis; GO:0065008 regulation of biological quality; GO:0035036 sperm-egg recognition; GO:0022414 reproductive process; GO:0061077 chaperone-mediated protein folding; GO:0009891 positive regulation of biosynthetic process; GO:0044699 single-organism process; GO:1901998 toxin transport; GO:0032204 regulation of telomere maintenance; GO:0051234 establishment of loc…	GO:0016020 membrane; GO:0044421 extracellular region part; GO:0005874 microtubule; GO:0071944 cell periphery; GO:0031982 vesicle; GO:0005737 cytoplasm; GO:0032991 macromolecular complex; GO:0099512 supramolecular fiber; GO:0044424 intracellular part; GO:0005623 cell; GO:0099080 supramolecular complex; GO:0044422 organelle part; GO:0002199 zona pellucida receptor complex; GO:0043228 non-membrane-b…	GO:0003723 RNA binding; GO:0005524 ATP binding; GO:1901265 nucleoside phosphate binding; GO:0001882 nucleoside binding; GO:0043167 ion binding; GO:0005515 protein binding; GO:0000166 nucleotide binding; GO:0044183 protein binding involved in protein folding; GO:1901363 heterocyclic compound binding; GO:0097159 organic cyclic compound binding; GO:0032549 ribonucleoside binding; GO:0097367 carbohyd…	K09495	CCT3, TRIC5; T-complex protein 1 subunit gamma		IPR027410; IPR027409; IPR027413;	TCP-1-like chaperonin intermediate domain; GroEL-like apical domain; GroEL-like equatorial domain;
P51153	Ras-related protein Rab-13 OS=Homo sapiens OX=9606 GN=RAB13 PE=1 SV=1	0.528	Down	0.0192035	RAB13	22.774	1.322	2.54	1.558	1.074	2.134	1.034	0.515	0.788	1.052	1.169	cytoplasm	GO:0044085 cellular component biogenesis; GO:0044700 single organism signaling; GO:0090130 tissue migration; GO:0022414 reproductive process; GO:0008584 male gonad development; GO:0090002 establishment of protein localization to plasma membrane; GO:1902463 protein localization to cell leading edge; GO:0015031 protein transport; GO:0097368 establishment of Sertoli cell barrier; GO:0009605 response…	GO:0016020 membrane; GO:0044421 extracellular region part; GO:0031090 organelle membrane; GO:0031410 cytoplasmic vesicle; GO:0071944 cell periphery; GO:0030054 cell junction; GO:0005737 cytoplasm; GO:0031982 vesicle; GO:0044433 cytoplasmic vesicle part; GO:0055038 recycling endosome membrane; GO:0044424 intracellular part; GO:0005911 cell-cell junction; GO:0005623 cell; GO:0044422 organelle part;…	GO:0051018 protein kinase A binding; GO:1901265 nucleoside phosphate binding; GO:0019901 protein kinase binding; GO:0016817 hydrolase activity, acting on acid anhydrides; GO:0005515 protein binding; GO:0016787 hydrolase activity; GO:0097159 organic cyclic compound binding; GO:1901363 heterocyclic compound binding; GO:0016462 pyrophosphatase activity; GO:0032553 ribonucleotide binding; GO:0003824 …	K06109	RAB13; Ras-related protein Rab-13	hsa04530 Tight junction	IPR005225; IPR027417;	Small GTP-binding protein domain; P-loop containing nucleoside triphosphate hydrolase;
P28066	Proteasome subunit alpha type-5 OS=Homo sapiens OX=9606 GN=PSMA5 PE=1 SV=3	1.859	Up	0.045537	PSMA5	26.411	0.79	2.291	0.38	0.394	0.435	2.463	1.378	1.621	1.247	1.267	cytoplasm	GO:0044700 single organism signaling; GO:0010608 posttranscriptional regulation of gene expression; GO:0051443 positive regulation of ubiquitin-protein transferase activity; GO:0031347 regulation of defense response; GO:0010564 regulation of cell cycle process; GO:0044237 cellular metabolic process; GO:1903364 positive regulation of cellular protein catabolic process; GO:0008152 metabolic process…	GO:0034774 secretory granule lumen; GO:0044421 extracellular region part; GO:0031410 cytoplasmic vesicle; GO:0031982 vesicle; GO:0005737 cytoplasm; GO:0044433 cytoplasmic vesicle part; GO:0032991 macromolecular complex; GO:0044424 intracellular part; GO:0005623 cell; GO:1904813 ficolin-1-rich granule lumen; GO:0044422 organelle part; GO:1905369 endopeptidase complex; GO:0070062 extracellular exos…	GO:0004175 endopeptidase activity; GO:0004298 threonine-type endopeptidase activity; GO:0008233 peptidase activity; GO:0070003 threonine-type peptidase activity; GO:0003824 catalytic activity; GO:0005488 binding; GO:0070011 peptidase activity, acting on L-amino acid peptides; GO:0016787 hydrolase activity; GO:0005515 protein binding;	K02729	PSMA5; 20S proteasome subunit alpha 5 [EC:3.4.25.1]	hsa03050 Proteasome	IPR029055; IPR000426;	Nucleophile aminohydrolases, N-terminal; Proteasome alpha-subunit, N-terminal domain;
Q9UBI6	Guanine nucleotide-binding protein G(I)/G(S)/G(O) subunit gamma-12 OS=Homo sapiens OX=9606 GN=GNG12 PE=1 SV=3	0.434	Down	0.014324	GNG12	8.0061	1.724	1.629	1.671	2.866	2.831	1.466	0.774	0.932	1.166	0.316	nucleus	GO:0021543 pallium development; GO:0050794 regulation of cellular process; GO:0044700 single organism signaling; GO:0044707 single-multicellular organism process; GO:0007420 brain development; GO:0071310 cellular response to organic substance; GO:1901700 response to oxygen-containing compound; GO:0044699 single-organism process; GO:0021987 cerebral cortex development; GO:0043207 response to exter…	GO:0016020 membrane; GO:0044421 extracellular region part; GO:0019898 extrinsic component of membrane; GO:0071944 cell periphery; GO:0098796 membrane protein complex; GO:0031982 vesicle; GO:0032991 macromolecular complex; GO:0099512 supramolecular fiber; GO:0044424 intracellular part; GO:0099080 supramolecular complex; GO:0005623 cell; GO:0031234 extrinsic component of cytoplasmic side of plasma …	GO:0005488 binding; GO:0043167 ion binding; GO:0042301 phosphate ion binding; GO:0043168 anion binding; GO:0005515 protein binding; GO:0019904 protein domain specific binding; GO:0030165 PDZ domain binding; GO:0004871 signal transducer activity;	K04347	GNG12; guanine nucleotide-binding protein G(I)/G(S)/G(O) subunit gamma-12	hsa04010 MAPK signaling pathway; hsa04014 Ras signaling pathway; hsa04062 Chemokine signaling pathway; hsa04151 PI3K-Akt signaling pathway; hsa04371 Apelin signaling pathway; hsa04713 Circadian entrainment; hsa04723 Retrograde endocannabinoid signaling; hsa04724 Glutamatergic synapse; hsa04725 Cholinergic synapse; hsa04726 Serotonergic synapse; hsa04727 GABAergic synapse; hsa04728 Dopaminergic sy…	IPR015898;	G-protein gamma-like domain;
Q9Y2S6	Translation machinery-associated protein 7 OS=Homo sapiens OX=9606 GN=TMA7 PE=1 SV=1	0.184	Down	0.00054323	TMA7	7.0662	1.869	1.343	1.283			0.341	0.228	0.257			nucleus
Q5SZK8	FRAS1-related extracellular matrix protein 2 OS=Homo sapiens OX=9606 GN=FREM2 PE=1 SV=2	4.227	Up	0.019077	FREM2	351.15	0.65	0.438	0.305			1.71	1.104	3.074			plasma membrane	GO:0072359 circulatory system development; GO:0032502 developmental process; GO:0044707 single-multicellular organism process; GO:0002009 morphogenesis of an epithelium; GO:0060429 epithelium development; GO:0009888 tissue development; GO:0048731 system development; GO:0044699 single-organism process; GO:0048839 inner ear development; GO:0032501 multicellular organismal process; GO:0022610 biolog…	GO:0016020 membrane; GO:0044421 extracellular region part; GO:0071944 cell periphery; GO:0031982 vesicle; GO:0031224 intrinsic component of membrane; GO:0005623 cell; GO:0044420 extracellular matrix component; GO:0016021 integral component of membrane; GO:0005576 extracellular region; GO:0005886 plasma membrane; GO:0005604 basement membrane; GO:0031012 extracellular matrix; GO:0043226 organelle; …	GO:0046872 metal ion binding; GO:0043169 cation binding; GO:0005488 binding; GO:0043167 ion binding;	K23380		hsa04512 ECM-receptor interaction	IPR003644;	Na-Ca exchanger/integrin-beta4;
Q8NBJ4	Golgi membrane protein 1 OS=Homo sapiens OX=9606 GN=GOLM1 PE=1 SV=1	0.374	Down	0.0142007	GOLM1	45.333	1.08	1.948	1.255			0.663	0.391	0.546			extracellular	GO:0006997 nucleus organization; GO:0016043 cellular component organization; GO:0050789 regulation of biological process; GO:0080090 regulation of primary metabolic process; GO:0006996 organelle organization; GO:0019222 regulation of metabolic process; GO:0019216 regulation of lipid metabolic process; GO:0009987 cellular process; GO:0065007 biological regulation; GO:0071840 cellular component org…	GO:0043229 intracellular organelle; GO:0016020 membrane; GO:0031226 intrinsic component of plasma membrane; GO:0005615 extracellular space; GO:0044421 extracellular region part; GO:0071944 cell periphery; GO:0005737 cytoplasm; GO:0031982 vesicle; GO:0012505 endomembrane system; GO:0031224 intrinsic component of membrane; GO:0044424 intracellular part; GO:0005887 integral component of plasma membr…	GO:0005515 protein binding; GO:0005488 binding;
P48506	Glutamate--cysteine ligase catalytic subunit OS=Homo sapiens OX=9606 GN=GCLC PE=1 SV=2	0.496	Down	0.044857	GCLC	72.765	1.268	1.482	1.148	0.827	2.988	0.958	0.634	1.183	0.409	0.643	cytoplasm	GO:0010941 regulation of cell death; GO:0065008 regulation of biological quality; GO:0006518 peptide metabolic process; GO:0032270 positive regulation of cellular protein metabolic process; GO:0032436 positive regulation of proteasomal ubiquitin-dependent protein catabolic process; GO:0042593 glucose homeostasis; GO:0043523 regulation of neuron apoptotic process; GO:0042398 cellular modified amin…	GO:1902494 catalytic complex; GO:0044464 cell part; GO:0005622 intracellular; GO:0017109 glutamate-cysteine ligase complex; GO:0005737 cytoplasm; GO:0032991 macromolecular complex; GO:0044424 intracellular part; GO:0005829 cytosol; GO:0005623 cell; GO:0044444 cytoplasmic part;	GO:0016597 amino acid binding; GO:1901265 nucleoside phosphate binding; GO:0046983 protein dimerization activity; GO:0016874 ligase activity; GO:0005515 protein binding; GO:0097159 organic cyclic compound binding; GO:1901363 heterocyclic compound binding; GO:0031406 carboxylic acid binding; GO:0003824 catalytic activity; GO:0032553 ribonucleotide binding; GO:0005488 binding; GO:0032550 purine rib…	K11204	GCLC; glutamate--cysteine ligase catalytic subunit [EC:6.3.2.2]	hsa00270 Cysteine and methionine metabolism; hsa00480 Glutathione metabolism; hsa01100 Metabolic pathways; hsa04216 Ferroptosis
P16885	"1-phosphatidylinositol 4,5-bisphosphate phosphodiesterase gamma-2 OS=Homo sapiens OX=9606 GN=PLCG2 PE=1 SV=4"	1.614	Up	0.046397	PLCG2	147.87	0.722	1.046	0.697	0.706	0.514	1.08	1.237	1.778	1.188	0.665	nucleus	GO:0044700 single organism signaling; GO:0060627 regulation of vesicle-mediated transport; GO:0032481 positive regulation of type I interferon production; GO:0007596 blood coagulation; GO:0065008 regulation of biological quality; GO:0010941 regulation of cell death; GO:0045321 leukocyte activation; GO:0002220 innate immune response activating cell surface receptor signaling pathway; GO:0007166 ce…	GO:0016020 membrane; GO:0044421 extracellular region part; GO:0071944 cell periphery; GO:0005737 cytoplasm; GO:0031982 vesicle; GO:0044424 intracellular part; GO:0005623 cell; GO:0005829 cytosol; GO:0005576 extracellular region; GO:0005886 plasma membrane; GO:0043226 organelle; GO:0070062 extracellular exosome; GO:0005622 intracellular; GO:0044464 cell part; GO:1903561 extracellular vesicle; GO:0…	GO:0004435 phosphatidylinositol phospholipase C activity; GO:0042578 phosphoric ester hydrolase activity; GO:0003824 catalytic activity; GO:0004629 phospholipase C activity; GO:0005488 binding; GO:0016788 hydrolase activity, acting on ester bonds; GO:0004620 phospholipase activity; GO:0008081 phosphoric diester hydrolase activity; GO:0016787 hydrolase activity; GO:0005515 protein binding; GO:0016…	K05859	PLCG2; phosphatidylinositol phospholipase C, gamma-2 [EC:3.1.4.11]	hsa00562 Inositol phosphate metabolism; hsa01100 Metabolic pathways; hsa01521 EGFR tyrosine kinase inhibitor resistance; hsa04012 ErbB signaling pathway; hsa04014 Ras signaling pathway; hsa04020 Calcium signaling pathway; hsa04064 NF-kappa B signaling pathway; hsa04066 HIF-1 signaling pathway; hsa04070 Phosphatidylinositol signaling system; hsa04072 Phospholipase D signaling pathway; hsa04360 Axo…	IPR000909; IPR011992; IPR001711; IPR001849; IPR000980; IPR001452; IPR017946; IPR011993; IPR000008;	Phosphatidylinositol-specific phospholipase C, X domain; EF-hand domain pair; Phospholipase C, phosphatidylinositol-specific, Y domain; Pleckstrin homology domain; SH2 domain; SH3 domain; PLC-like phosphodiesterase, TIM beta/alpha-barrel domain; PH domain-like; C2 domain;
P67936	Tropomyosin alpha-4 chain OS=Homo sapiens OX=9606 GN=TPM4 PE=1 SV=3	0.469	Down	0.0101989	TPM4	28.521	2.359	3.088	1.403	1.235	1.505	1.34	0.918	0.893	0.595	0.753	cytoplasm	GO:0030048 actin filament-based movement; GO:0032502 developmental process; GO:0016043 cellular component organization; GO:0001649 osteoblast differentiation; GO:0044707 single-multicellular organism process; GO:0030049 muscle filament sliding; GO:0070252 actin-mediated cell contraction; GO:0003012 muscle system process; GO:0003008 system process; GO:0033275 actin-myosin filament sliding; GO:0001…	GO:0016020 membrane; GO:0044421 extracellular region part; GO:0005938 cell cortex; GO:0030054 cell junction; GO:0071944 cell periphery; GO:0030016 myofibril; GO:0031982 vesicle; GO:0099568 cytoplasmic region; GO:0005737 cytoplasm; GO:0030863 cortical cytoskeleton; GO:0032991 macromolecular complex; GO:0099512 supramolecular fiber; GO:0044424 intracellular part; GO:0099080 supramolecular complex; …	GO:0051015 actin filament binding; GO:0008092 cytoskeletal protein binding; GO:0005488 binding; GO:0043167 ion binding; GO:0044877 macromolecular complex binding; GO:0003779 actin binding; GO:0046872 metal ion binding; GO:0043169 cation binding; GO:0005515 protein binding; GO:0005509 calcium ion binding; GO:0008307 structural constituent of muscle; GO:0005198 structural molecule activity; GO:0032…	K10375	TPM4; tropomyosin 4	hsa04260 Cardiac muscle contraction; hsa04261 Adrenergic signaling in cardiomyocytes; hsa05410 Hypertrophic cardiomyopathy (HCM); hsa05414 Dilated cardiomyopathy (DCM)
P63000	Ras-related C3 botulinum toxin substrate 1 OS=Homo sapiens OX=9606 GN=RAC1 PE=1 SV=1	0.659	Down	0.024379	RAC1	21.45	1.715	0.92	1.484	1.308	1.538	0.842	1.009	0.96	0.927	0.854	cytoplasm	GO:0044700 single organism signaling; GO:0044085 cellular component biogenesis; GO:0002694 regulation of leukocyte activation; GO:0010941 regulation of cell death; GO:0009891 positive regulation of biosynthetic process; GO:0031347 regulation of defense response; GO:0035315 hair cell differentiation; GO:0009913 epidermal cell differentiation; GO:0051894 positive regulation of focal adhesion assemb…	GO:0030425 dendrite; GO:0016020 membrane; GO:0098862 cluster of actin-based cell projections; GO:0044421 extracellular region part; GO:0044450 microtubule organizing center part; GO:0031090 organelle membrane; GO:0019898 extrinsic component of membrane; GO:0032587 ruffle membrane; GO:0097732 9+2 non-motile cilium; GO:0005737 cytoplasm; GO:0044433 cytoplasmic vesicle part; GO:0032991 macromolecula…	GO:1901265 nucleoside phosphate binding; GO:0019901 protein kinase binding; GO:0016817 hydrolase activity, acting on acid anhydrides; GO:0016787 hydrolase activity; GO:0005515 protein binding; GO:0031996 thioesterase binding; GO:0017137 Rab GTPase binding; GO:0097159 organic cyclic compound binding; GO:1901363 heterocyclic compound binding; GO:0042826 histone deacetylase binding; GO:0016462 pyrop…	K04392	RAC1; Ras-related C3 botulinum toxin substrate 1	hsa04010 MAPK signaling pathway; hsa04014 Ras signaling pathway; hsa04015 Rap1 signaling pathway; hsa04024 cAMP signaling pathway; hsa04062 Chemokine signaling pathway; hsa04071 Sphingolipid signaling pathway; hsa04145 Phagosome; hsa04151 PI3K-Akt signaling pathway; hsa04310 Wnt signaling pathway; hsa04360 Axon guidance; hsa04370 VEGF signaling pathway; hsa04380 Osteoclast differentiation; hsa045…	IPR005225; IPR027417;	Small GTP-binding protein domain; P-loop containing nucleoside triphosphate hydrolase;
Q12765	Secernin-1 OS=Homo sapiens OX=9606 GN=SCRN1 PE=1 SV=2	0.173	Down	0.00076086	SCRN1	46.382	3.233	3.251	2.601			0.645	0.571	0.36			cytoplasm,nucleus	GO:0016192 vesicle-mediated transport; GO:0044763 single-organism cellular process; GO:0044699 single-organism process; GO:0044238 primary metabolic process; GO:0051234 establishment of localization; GO:0071704 organic substance metabolic process; GO:0006810 transport; GO:0008152 metabolic process; GO:1902578 single-organism localization; GO:0032940 secretion by cell; GO:0006508 proteolysis; GO:0…	GO:0016020 membrane; GO:0043229 intracellular organelle; GO:0031090 organelle membrane; GO:0005635 nuclear envelope; GO:0005737 cytoplasm; GO:0044446 intracellular organelle part; GO:0031967 organelle envelope; GO:0012505 endomembrane system; GO:0044424 intracellular part; GO:0005623 cell; GO:0044422 organelle part; GO:0043226 organelle; GO:0043231 intracellular membrane-bounded organelle; GO:003…	GO:0070011 peptidase activity, acting on L-amino acid peptides; GO:0016787 hydrolase activity; GO:0008233 peptidase activity; GO:0008238 exopeptidase activity; GO:0005515 protein binding; GO:0003824 catalytic activity; GO:0005488 binding; GO:0016805 dipeptidase activity;	K14358	SCRN; secernin
P07998	Ribonuclease pancreatic OS=Homo sapiens OX=9606 GN=RNASE1 PE=1 SV=4	0.284	Down	0.0066242	RNASE1	17.644	4.202	4.714	4.782	1.87	2.033	3	0.48	0.536	0.464	0.519	extracellular	GO:0006725 cellular aromatic compound metabolic process; GO:1901360 organic cyclic compound metabolic process; GO:0006807 nitrogen compound metabolic process; GO:0044238 primary metabolic process; GO:0044237 cellular metabolic process; GO:0071704 organic substance metabolic process; GO:0016070 RNA metabolic process; GO:0090501 RNA phosphodiester bond hydrolysis; GO:0008152 metabolic process; GO:0…	GO:0070062 extracellular exosome; GO:0043226 organelle; GO:0044421 extracellular region part; GO:0031982 vesicle; GO:1903561 extracellular vesicle; GO:0043227 membrane-bounded organelle; GO:0005576 extracellular region; GO:0043230 extracellular organelle;	GO:0004521 endoribonuclease activity; GO:0005515 protein binding; GO:0016787 hydrolase activity; GO:0016894 endonuclease activity, active with either ribo- or deoxyribonucleic acids and producing 3'-phosphomonoesters; GO:1901363 heterocyclic compound binding; GO:0097159 organic cyclic compound binding; GO:0003824 catalytic activity; GO:0004522 ribonuclease A activity; GO:0016892 endoribonuclease …	K01168	RNASE1_2; pancreatic ribonuclease [EC:3.1.27.5]		IPR023412;	Ribonuclease A-domain;
O94804	Serine/threonine-protein kinase 10 OS=Homo sapiens OX=9606 GN=STK10 PE=1 SV=1	0.415	Down	0.0047411	STK10	112.13	1.128	2.184	1.649	1.504	3.378	1.099	0.573	0.82	0.874	0.715	mitochondria	GO:0044700 single organism signaling; GO:0045321 leukocyte activation; GO:0070486 leukocyte aggregation; GO:0044699 single-organism process; GO:0044237 cellular metabolic process; GO:0006796 phosphate-containing compound metabolic process; GO:0051234 establishment of localization; GO:0022610 biological adhesion; GO:0008152 metabolic process; GO:0007165 signal transduction; GO:0016337 single organ…	GO:0016020 membrane; GO:0044421 extracellular region part; GO:0031090 organelle membrane; GO:0031410 cytoplasmic vesicle; GO:0071944 cell periphery; GO:0031982 vesicle; GO:0005737 cytoplasm; GO:0044433 cytoplasmic vesicle part; GO:0044424 intracellular part; GO:0005623 cell; GO:0044422 organelle part; GO:0070062 extracellular exosome; GO:0005622 intracellular; GO:0044464 cell part; GO:0098805 who…	GO:1901265 nucleoside phosphate binding; GO:0016773 phosphotransferase activity, alcohol group as acceptor; GO:0046983 protein dimerization activity; GO:0005515 protein binding; GO:0004672 protein kinase activity; GO:0004702 signal transducer, downstream of receptor, with serine/threonine kinase activity; GO:0004871 signal transducer activity; GO:0097159 organic cyclic compound binding; GO:190136…	K08837	STK10, LOK; serine/threonine kinase 10 [EC:2.7.11.1]	hsa04914 Progesterone-mediated oocyte maturation	IPR000719; IPR011009;	Protein kinase domain; Protein kinase-like domain;
P13611	Versican core protein OS=Homo sapiens OX=9606 GN=VCAN PE=1 SV=3	4.055	Up	0.047342	VCAN	372.82				0.255	0.402				1.044	1.62	mitochondria	GO:0001649 osteoblast differentiation; GO:0016053 organic acid biosynthetic process; GO:0051674 localization of cell; GO:0030206 chondroitin sulfate biosynthetic process; GO:0006024 glycosaminoglycan biosynthetic process; GO:0006026 aminoglycan catabolic process; GO:0048869 cellular developmental process; GO:0022008 neurogenesis; GO:0044699 single-organism process; GO:0009058 biosynthetic process…	GO:0016020 membrane; GO:0005615 extracellular space; GO:0044421 extracellular region part; GO:0005737 cytoplasm; GO:0044424 intracellular part; GO:0005623 cell; GO:0044422 organelle part; GO:0005775 vacuolar lumen; GO:0031974 membrane-enclosed lumen; GO:0070013 intracellular organelle lumen; GO:0005622 intracellular; GO:0044464 cell part; GO:0005764 lysosome; GO:0044431 Golgi apparatus part; GO:0…	GO:0005201 extracellular matrix structural constituent; GO:0097367 carbohydrate derivative binding; GO:0005488 binding; GO:0043167 ion binding; GO:0005540 hyaluronic acid binding; GO:0043169 cation binding; GO:0046872 metal ion binding; GO:0030246 carbohydrate binding; GO:0005515 protein binding; GO:0005509 calcium ion binding; GO:0005539 glycosaminoglycan binding; GO:0005198 structural molecule …	K06793	VCAN, CSPG2; versican core protein	hsa04514 Cell adhesion molecules (CAMs)	IPR007110; IPR016187; IPR001881; IPR003599; IPR000742; IPR016186; IPR001304; IPR033987; IPR000436; IPR013783; IPR000538; IPR013106;	Immunoglobulin-like domain; C-type lectin fold; EGF-like calcium-binding domain; Immunoglobulin subtype; EGF-like domain; C-type lectin-like/link domain; C-type lectin-like; Aggrecan/versican, C-type lectin-like domain; Sushi/SCR/CCP domain; Immunoglobulin-like fold; Link domain; Immunoglobulin V-set domain;
Q14697	Neutral alpha-glucosidase AB OS=Homo sapiens OX=9606 GN=GANAB PE=1 SV=3	2.598	Up	0.0112387	GANAB	106.87	0.595	0.375	0.409	0.58	0.591	0.884	1.173	2.788	1.1	0.679	endoplasmic reticulum	GO:0006457 protein folding; GO:0008152 metabolic process; GO:0005975 carbohydrate metabolic process; GO:0044238 primary metabolic process; GO:0009987 cellular process; GO:0071704 organic substance metabolic process;	GO:0016020 membrane; GO:0044421 extracellular region part; GO:0005783 endoplasmic reticulum; GO:0031410 cytoplasmic vesicle; GO:0031982 vesicle; GO:0005737 cytoplasm; GO:0032991 macromolecular complex; GO:0044424 intracellular part; GO:0005623 cell; GO:0044422 organelle part; GO:0048770 pigment granule; GO:0070062 extracellular exosome; GO:0031974 membrane-enclosed lumen; GO:0070013 intracellular…	GO:0097159 organic cyclic compound binding; GO:1901363 heterocyclic compound binding; GO:0003723 RNA binding; GO:0090599 alpha-glucosidase activity; GO:0003824 catalytic activity; GO:0005488 binding; GO:0016798 hydrolase activity, acting on glycosyl bonds; GO:0003676 nucleic acid binding; GO:0015926 glucosidase activity; GO:0030246 carbohydrate binding; GO:0004553 hydrolase activity, hydrolyzing …	K05546	GANAB; alpha 1,3-glucosidase [EC:3.2.1.84]	hsa00510 N-Glycan biosynthesis; hsa01100 Metabolic pathways; hsa04141 Protein processing in endoplasmic reticulum	IPR011013; IPR025887; IPR017853;	Galactose mutarotase-like domain; Glycoside hydrolase family 31, N-terminal domain; Glycoside hydrolase superfamily;
Q5VW32	BRO1 domain-containing protein BROX OS=Homo sapiens OX=9606 GN=BROX PE=1 SV=1	0.487	Down	0.031719	BROX	46.476	2.646	0.728	2.047	1.154	1.917	0.746	1.141	0.727	0.769	0.75	mitochondria		GO:0016020 membrane; GO:0070062 extracellular exosome; GO:0043226 organelle; GO:0044421 extracellular region part; GO:0031982 vesicle; GO:1903561 extracellular vesicle; GO:0043227 membrane-bounded organelle; GO:0005576 extracellular region; GO:0043230 extracellular organelle;					IPR004328;	BRO1 domain;
Q08554	Desmocollin-1 OS=Homo sapiens OX=9606 GN=DSC1 PE=1 SV=2	0.53	Down	0.038518	DSC1	99.986	0.734	0.966	1.395	1.985	1.47	0.556	0.658	0.569	0.368	1.322	endoplasmic reticulum	GO:0044707 single-multicellular organism process; GO:0045321 leukocyte activation; GO:0002283 neutrophil activation involved in immune response; GO:0002252 immune effector process; GO:0031424 keratinization; GO:0048869 cellular developmental process; GO:0044699 single-organism process; GO:0050896 response to stimulus; GO:0051234 establishment of localization; GO:0022610 biological adhesion; GO:00…	GO:0016020 membrane; GO:0044421 extracellular region part; GO:0031090 organelle membrane; GO:0031410 cytoplasmic vesicle; GO:0071944 cell periphery; GO:0030054 cell junction; GO:0005737 cytoplasm; GO:0031982 vesicle; GO:0044433 cytoplasmic vesicle part; GO:0031224 intrinsic component of membrane; GO:0044424 intracellular part; GO:0005623 cell; GO:0005911 cell-cell junction; GO:0044422 organelle p…	GO:0046872 metal ion binding; GO:0043169 cation binding; GO:0005509 calcium ion binding; GO:0005488 binding; GO:0043167 ion binding;	K07600	DSC1; desmocollin 1		IPR015919; IPR027397; IPR014868; IPR000233; IPR002126;	Cadherin-like; Catenin binding domain; Cadherin prodomain; Cadherin, cytoplasmic domain; Cadherin;
Q9Y342	Plasmolipin OS=Homo sapiens OX=9606 GN=PLLP PE=1 SV=1	0.434	Down	0.0067581	PLLP	19.986	2.01	2.408	1.924			0.666	1.08	1.005			plasma membrane	GO:0016043 cellular component organization; GO:0044707 single-multicellular organism process; GO:0031580 membrane raft distribution; GO:0007272 ensheathment of neurons; GO:0008366 axon ensheathment; GO:0044699 single-organism process; GO:0051668 localization within membrane; GO:0050896 response to stimulus; GO:0051234 establishment of localization; GO:0009611 response to wounding; GO:1902578 sing…	GO:0016020 membrane; GO:0043218 compact myelin; GO:0044421 extracellular region part; GO:0098857 membrane microdomain; GO:0031982 vesicle; GO:0031224 intrinsic component of membrane; GO:0005623 cell; GO:0016021 integral component of membrane; GO:0005576 extracellular region; GO:0043226 organelle; GO:0070062 extracellular exosome; GO:0043209 myelin sheath; GO:0044464 cell part; GO:0044425 membrane…	GO:0005515 protein binding; GO:0005198 structural molecule activity; GO:0005488 binding; GO:0019911 structural constituent of myelin sheath;				IPR008253;	Marvel domain;
P00568	Adenylate kinase isoenzyme 1 OS=Homo sapiens OX=9606 GN=AK1 PE=1 SV=3	0.397	Down	0.0150619	AK1	21.635	2.617	2.371	1.629			0.858	0.619	1.147			cytoplasm	GO:0016310 phosphorylation; GO:0009116 nucleoside metabolic process; GO:0042278 purine nucleoside metabolic process; GO:0006165 nucleoside diphosphate phosphorylation; GO:0006725 cellular aromatic compound metabolic process; GO:0009167 purine ribonucleoside monophosphate metabolic process; GO:0015949 nucleobase-containing small molecule interconversion; GO:0009259 ribonucleotide metabolic process…	GO:0044421 extracellular region part; GO:0031982 vesicle; GO:0005737 cytoplasm; GO:0044424 intracellular part; GO:0005623 cell; GO:0005829 cytosol; GO:0005576 extracellular region; GO:0043226 organelle; GO:0070062 extracellular exosome; GO:0005622 intracellular; GO:0044464 cell part; GO:1903561 extracellular vesicle; GO:0043227 membrane-bounded organelle; GO:0043230 extracellular organelle; GO:00…	GO:0005524 ATP binding; GO:1901265 nucleoside phosphate binding; GO:0004017 adenylate kinase activity; GO:0004550 nucleoside diphosphate kinase activity; GO:0019205 nucleobase-containing compound kinase activity; GO:0001882 nucleoside binding; GO:0043167 ion binding; GO:0000166 nucleotide binding; GO:0019201 nucleotide kinase activity; GO:0016776 phosphotransferase activity, phosphate group as ac…	K00939	adk, AK; adenylate kinase [EC:2.7.4.3]	hsa00230 Purine metabolism; hsa00730 Thiamine metabolism; hsa01100 Metabolic pathways	IPR027417;	P-loop containing nucleoside triphosphate hydrolase;
Q14451	Growth factor receptor-bound protein 7 OS=Homo sapiens OX=9606 GN=GRB7 PE=1 SV=2	0.485	Down	0.029397	GRB7	59.68	2.329	1.242	3.061	1.056	1.325	1.564	0.585	0.719	0.693	0.814	nucleus	GO:0044085 cellular component biogenesis; GO:0044700 single organism signaling; GO:0022613 ribonucleoprotein complex biogenesis; GO:0030335 positive regulation of cell migration; GO:0051674 localization of cell; GO:0022618 ribonucleoprotein complex assembly; GO:0007166 cell surface receptor signaling pathway; GO:0010608 posttranscriptional regulation of gene expression; GO:0040017 positive regula…	GO:0010494 cytoplasmic stress granule; GO:0043229 intracellular organelle; GO:0016020 membrane; GO:0042995 cell projection; GO:0043232 intracellular non-membrane-bounded organelle; GO:0071944 cell periphery; GO:0030054 cell junction; GO:0005737 cytoplasm; GO:0070161 anchoring junction; GO:0032991 macromolecular complex; GO:0044424 intracellular part; GO:0005829 cytosol; GO:0005623 cell; GO:003646…	GO:0003723 RNA binding; GO:0030674 protein binding, bridging; GO:0043167 ion binding; GO:0019901 protein kinase binding; GO:0005515 protein binding; GO:0019900 kinase binding; GO:1901363 heterocyclic compound binding; GO:0097159 organic cyclic compound binding; GO:0005070 SH3/SH2 adaptor activity; GO:0042802 identical protein binding; GO:0035591 signaling adaptor activity; GO:0005488 binding; GO:…	K23695			IPR000980; IPR011993; IPR029071; IPR015042; IPR000159; IPR001849;	SH2 domain; PH domain-like; Ubiquitin-related domain; BPS (Between PH and SH2) domain; Ras-associating (RA) domain; Pleckstrin homology domain;
P35998	26S proteasome regulatory subunit 7 OS=Homo sapiens OX=9606 GN=PSMC2 PE=1 SV=3	2.281	Up	0.0174604	PSMC2	48.633	0.675	0.852	0.503	0.382	0.357	0.595	1.32	1.995	0.91	1.495	cytoplasm	GO:0044700 single organism signaling; GO:0010608 posttranscriptional regulation of gene expression; GO:0051443 positive regulation of ubiquitin-protein transferase activity; GO:0009891 positive regulation of biosynthetic process; GO:0031347 regulation of defense response; GO:0010564 regulation of cell cycle process; GO:0044237 cellular metabolic process; GO:1903364 positive regulation of cellular…	GO:0016020 membrane; GO:0034774 secretory granule lumen; GO:0031410 cytoplasmic vesicle; GO:0005838 proteasome regulatory particle; GO:0000932 P-body; GO:0031982 vesicle; GO:0005737 cytoplasm; GO:0044433 cytoplasmic vesicle part; GO:0032991 macromolecular complex; GO:0044424 intracellular part; GO:0005623 cell; GO:1904813 ficolin-1-rich granule lumen; GO:0036464 cytoplasmic ribonucleoprotein gran…	GO:1901265 nucleoside phosphate binding; GO:0016817 hydrolase activity, acting on acid anhydrides; GO:0016787 hydrolase activity; GO:0005515 protein binding; GO:0016887 ATPase activity; GO:0097159 organic cyclic compound binding; GO:1901363 heterocyclic compound binding; GO:0016462 pyrophosphatase activity; GO:0032553 ribonucleotide binding; GO:0003824 catalytic activity; GO:0005488 binding; GO:0…	K03061	PSMC2, RPT1; 26S proteasome regulatory subunit T1	hsa03050 Proteasome; hsa05169 Epstein-Barr virus infection	IPR003593; IPR003959; IPR027417;	AAA+ ATPase domain; ATPase, AAA-type, core; P-loop containing nucleoside triphosphate hydrolase;
P78363	Retinal-specific phospholipid-transporting ATPase ABCA4 OS=Homo sapiens OX=9606 GN=ABCA4 PE=1 SV=3	0.066	Down	0.0084772	ABCA4	255.94	11.265	2.104	6.005			0.443	0.287	0.552			plasma membrane	GO:0044700 single organism signaling; GO:0065008 regulation of biological quality; GO:0007601 visual perception; GO:0044699 single-organism process; GO:0044255 cellular lipid metabolic process; GO:0097035 regulation of membrane lipid distribution; GO:0044237 cellular metabolic process; GO:0048871 multicellular organismal homeostasis; GO:0050877 neurological system process; GO:0051234 establishmen…	GO:0060170 ciliary membrane; GO:0005929 cilium; GO:0043229 intracellular organelle; GO:0016020 membrane; GO:0042995 cell projection; GO:0031226 intrinsic component of plasma membrane; GO:0098588 bounding membrane of organelle; GO:0031090 organelle membrane; GO:0071944 cell periphery; GO:0097730 non-motile cilium; GO:0031224 intrinsic component of membrane; GO:0044424 intracellular part; GO:000588…	GO:1901265 nucleoside phosphate binding; GO:0005395 eye pigment precursor transporter activity; GO:0015399 primary active transmembrane transporter activity; GO:0005319 lipid transporter activity; GO:0022892 substrate-specific transporter activity; GO:0016817 hydrolase activity, acting on acid anhydrides; GO:0016787 hydrolase activity; GO:0090555 phosphatidylethanolamine-translocating ATPase acti…	K05644	ABCA4; ATP-binding cassette, subfamily A (ABC1), member 4	hsa02010 ABC transporters	IPR003593; IPR003439; IPR027417;	AAA+ ATPase domain; ABC transporter-like; P-loop containing nucleoside triphosphate hydrolase;
Q9Y496	Kinesin-like protein KIF3A OS=Homo sapiens OX=9606 GN=KIF3A PE=1 SV=4	0.48	Down	0.045517	KIF3A	80.04	1.535	1.269	1.169			0.825	0.729	0.355			nucleus	GO:0098840 protein transport along microtubule; GO:0044085 cellular component biogenesis; GO:0034453 microtubule anchoring; GO:0048869 cellular developmental process; GO:0022008 neurogenesis; GO:0060271 cilium assembly; GO:0044699 single-organism process; GO:0015031 protein transport; GO:0044782 cilium organization; GO:0051234 establishment of localization; GO:0010970 transport along microtubule;…	GO:0044421 extracellular region part; GO:0044450 microtubule organizing center part; GO:0005874 microtubule; GO:0031982 vesicle; GO:0005737 cytoplasm; GO:0032991 macromolecular complex; GO:0099512 supramolecular fiber; GO:0044424 intracellular part; GO:0005623 cell; GO:0099080 supramolecular complex; GO:0044422 organelle part; GO:0043228 non-membrane-bounded organelle; GO:0070062 extracellular ex…	GO:1901265 nucleoside phosphate binding; GO:0003774 motor activity; GO:0016817 hydrolase activity, acting on acid anhydrides; GO:0016787 hydrolase activity; GO:0005515 protein binding; GO:0017137 Rab GTPase binding; GO:0016887 ATPase activity; GO:1901363 heterocyclic compound binding; GO:0097159 organic cyclic compound binding; GO:0008092 cytoskeletal protein binding; GO:0016462 pyrophosphatase a…	K10394	KIF3A; kinesin family member 3A	hsa04340 Hedgehog signaling pathway	IPR027417; IPR001752;	P-loop containing nucleoside triphosphate hydrolase; Kinesin motor domain;
Q9H0W9	Ester hydrolase C11orf54 OS=Homo sapiens OX=9606 GN=C11orf54 PE=1 SV=1	0.399	Down	0.0047184	C11orf54	35.117	1.772	1.369	1.473			0.759	0.622	0.461			cytoplasm		GO:0043229 intracellular organelle; GO:0044421 extracellular region part; GO:0044446 intracellular organelle part; GO:0031982 vesicle; GO:0031981 nuclear lumen; GO:0044424 intracellular part; GO:0016604 nuclear body; GO:0005623 cell; GO:0005576 extracellular region; GO:0044422 organelle part; GO:0031974 membrane-enclosed lumen; GO:0043226 organelle; GO:0070062 extracellular exosome; GO:0043231 in…	GO:0046914 transition metal ion binding; GO:0003824 catalytic activity; GO:0005488 binding; GO:0043167 ion binding; GO:0016788 hydrolase activity, acting on ester bonds; GO:0043169 cation binding; GO:0046872 metal ion binding; GO:0005515 protein binding; GO:0016787 hydrolase activity; GO:0008270 zinc ion binding;				IPR015021;	Domain of unknown function DUF1907;
P04114	Apolipoprotein B-100 OS=Homo sapiens OX=9606 GN=APOB PE=1 SV=2	4.448	Up	0.026699	APOB	515.6	0.64	0.445	0.309	0.409	0.263	2.008	0.396	3.484	0.607	2.695	endoplasmic reticulum	GO:0044700 single organism signaling; GO:0044085 cellular component biogenesis; GO:0010744 positive regulation of macrophage derived foam cell differentiation; GO:0065008 regulation of biological quality; GO:0022414 reproductive process; GO:0006066 alcohol metabolic process; GO:0043009 chordate embryonic development; GO:0034379 very-low-density lipoprotein particle assembly; GO:0044255 cellular l…	GO:0016020 membrane; GO:0044421 extracellular region part; GO:0045334 clathrin-coated endocytic vesicle; GO:0031090 organelle membrane; GO:0034362 low-density lipoprotein particle; GO:0005737 cytoplasm; GO:0044433 cytoplasmic vesicle part; GO:0034385 triglyceride-rich plasma lipoprotein particle; GO:0043025 neuronal cell body; GO:0032991 macromolecular complex; GO:0005623 cell; GO:0034361 very-lo…	GO:0035473 lipase binding; GO:0005102 receptor binding; GO:0043167 ion binding; GO:0005319 lipid transporter activity; GO:0022892 substrate-specific transporter activity; GO:0005515 protein binding; GO:0008201 heparin binding; GO:1901681 sulfur compound binding; GO:0070325 lipoprotein particle receptor binding; GO:0097367 carbohydrate derivative binding; GO:0017127 cholesterol transporter activit…	K14462	APOB; apolipoprotein B	hsa04975 Fat digestion and absorption; hsa04977 Vitamin digestion and absorption; hsa04979 Cholesterol metabolism	IPR011030; IPR015817; IPR015818; IPR001747; IPR015819; IPR015816; IPR022176; IPR016024; IPR015255; IPR009454;	Vitellinogen, superhelical; Vitellinogen, open beta-sheet, subdomain 1; Vitellinogen, open beta-sheet, subdomain 2; Lipid transport protein, N-terminal; Lipid transport protein, beta-sheet shell; Vitellinogen, beta-sheet N-terminal; Apolipoprotein B100 C-terminal; Armadillo-type fold; Vitellinogen, open beta-sheet; Lipid transport, open beta-sheet;
Q99835	Smoothened homolog OS=Homo sapiens OX=9606 GN=SMO PE=1 SV=1	1.745	Up	0.027084	SMO	86.396	0.825	0.963	0.729	0.357	0.54	0.98	1.833	0.958	1.213	0.974	plasma membrane	GO:0044700 single organism signaling; GO:0010941 regulation of cell death; GO:0021766 hippocampus development; GO:0048732 gland development; GO:0048853 forebrain morphogenesis; GO:0021937 cerebellar Purkinje cell-granule cell precursor cell signaling involved in regulation of granule cell precursor cell proliferation; GO:0043009 chordate embryonic development; GO:0009891 positive regulation of bi…	GO:0060170 ciliary membrane; GO:0016020 membrane; GO:0044421 extracellular region part; GO:0031090 organelle membrane; GO:0031410 cytoplasmic vesicle; GO:0071944 cell periphery; GO:0031982 vesicle; GO:0005737 cytoplasm; GO:0044433 cytoplasmic vesicle part; GO:0031224 intrinsic component of membrane; GO:0044424 intracellular part; GO:0005623 cell; GO:0044422 organelle part; GO:0070062 extracellula…	GO:0038023 signaling receptor activity; GO:0060089 molecular transducer activity; GO:0004872 receptor activity; GO:0005102 receptor binding; GO:0005488 binding; GO:0004930 G-protein coupled receptor activity; GO:0005113 patched binding; GO:0005515 protein binding; GO:0008144 drug binding; GO:0004888 transmembrane signaling receptor activity; GO:0004871 signal transducer activity; GO:0099600 trans…	K06226	SMO; smoothened	hsa04340 Hedgehog signaling pathway; hsa04360 Axon guidance; hsa05200 Pathways in cancer; hsa05205 Proteoglycans in cancer; hsa05217 Basal cell carcinoma	IPR020067; IPR017981;	Frizzled domain; GPCR, family 2-like;
P29728	2'-5'-oligoadenylate synthase 2 OS=Homo sapiens OX=9606 GN=OAS2 PE=1 SV=3	0.185	Down	0.033357	OAS2	82.43	3.086	8.867	2.048			1.133	0.882	0.577			mitochondria	GO:0044700 single organism signaling; GO:0043413 macromolecule glycosylation; GO:0007166 cell surface receptor signaling pathway; GO:0009117 nucleotide metabolic process; GO:0098542 defense response to other organism; GO:0071346 cellular response to interferon-gamma; GO:0044699 single-organism process; GO:0009058 biosynthetic process; GO:0044764 multi-organism cellular process; GO:0044237 cellula…	GO:0043229 intracellular organelle; GO:0016020 membrane; GO:0005783 endoplasmic reticulum; GO:0044446 intracellular organelle part; GO:0005737 cytoplasm; GO:0031981 nuclear lumen; GO:0012505 endomembrane system; GO:0044424 intracellular part; GO:0005829 cytosol; GO:0005623 cell; GO:0044422 organelle part; GO:0005739 mitochondrion; GO:0031974 membrane-enclosed lumen; GO:0043231 intracellular membr…	GO:1901265 nucleoside phosphate binding; GO:0005515 protein binding; GO:1901363 heterocyclic compound binding; GO:0097159 organic cyclic compound binding; GO:0003824 catalytic activity; GO:0032553 ribonucleotide binding; GO:0005488 binding; GO:0032550 purine ribonucleoside binding; GO:0043169 cation binding; GO:0043168 anion binding; GO:0032559 adenyl ribonucleotide binding; GO:0030554 adenyl nuc…	K14216	OAS; 2'-5'-oligoadenylate synthetase [EC:2.7.7.84]	hsa04621 NOD-like receptor signaling pathway; hsa05160 Hepatitis C; hsa05162 Measles; hsa05164 Influenza A; hsa05168 Herpes simplex virus 1 infection; hsa05169 Epstein-Barr virus infection	IPR002934; IPR018952; IPR006116;	Polymerase, nucleotidyl transferase domain; 2'-5'-oligoadenylate synthetase 1, domain 2/C-terminal; 2-5-oligoadenylate synthetase, N-terminal;
Q9UNE7	E3 ubiquitin-protein ligase CHIP OS=Homo sapiens OX=9606 GN=STUB1 PE=1 SV=2	0.523	Down	0.040455	STUB1	34.856	1.855	0.727	1.042	0.744	0.96	0.991	0.539	0.304	0.311	0.641	cytoplasm	GO:0044700 single organism signaling; GO:0065008 regulation of biological quality; GO:0032270 positive regulation of cellular protein metabolic process; GO:0007166 cell surface receptor signaling pathway; GO:0032436 positive regulation of proteasomal ubiquitin-dependent protein catabolic process; GO:0051443 positive regulation of ubiquitin-protein transferase activity; GO:0036503 ERAD pathway; GO…	GO:0044421 extracellular region part; GO:0005783 endoplasmic reticulum; GO:0030016 myofibril; GO:0031982 vesicle; GO:0005737 cytoplasm; GO:0032991 macromolecular complex; GO:0099512 supramolecular fiber; GO:0044424 intracellular part; GO:0030018 Z disc; GO:0099080 supramolecular complex; GO:0005623 cell; GO:0031674 I band; GO:0044422 organelle part; GO:0043228 non-membrane-bounded organelle; GO:0…	GO:0030674 protein binding, bridging; GO:0031072 heat shock protein binding; GO:0019787 ubiquitin-like protein transferase activity; GO:0031625 ubiquitin protein ligase binding; GO:0005102 receptor binding; GO:0046983 protein dimerization activity; GO:0034450 ubiquitin-ubiquitin ligase activity; GO:0051787 misfolded protein binding; GO:0051879 Hsp90 protein binding; GO:0005515 protein binding; GO…	K09561	STUB1, CHIP; STIP1 homology and U-box containing protein 1 [EC:2.3.2.27]	hsa04120 Ubiquitin mediated proteolysis; hsa04141 Protein processing in endoplasmic reticulum	IPR011990; IPR003613; IPR013083; IPR013026;	Tetratricopeptide-like helical domain; U box domain; Zinc finger, RING/FYVE/PHD-type; Tetratricopeptide repeat-containing domain;
Q00722	"1-phosphatidylinositol 4,5-bisphosphate phosphodiesterase beta-2 OS=Homo sapiens OX=9606 GN=PLCB2 PE=1 SV=2"	0.258	Down	0.0066045	PLCB2	134.02	2.897	4.301	3.301			0.745		1.064			nucleus	GO:0050794 regulation of cellular process; GO:0044700 single organism signaling; GO:1901615 organic hydroxy compound metabolic process; GO:0007166 cell surface receptor signaling pathway; GO:0006066 alcohol metabolic process; GO:0010517 regulation of phospholipase activity; GO:0044699 single-organism process; GO:0044255 cellular lipid metabolic process; GO:0050913 sensory perception of bitter tas…	GO:0044464 cell part; GO:0005622 intracellular; GO:0005737 cytoplasm; GO:0044424 intracellular part; GO:0005623 cell; GO:0005829 cytosol; GO:0044444 cytoplasmic part;	GO:0004629 phospholipase C activity; GO:0043167 ion binding; GO:0005515 protein binding; GO:0016787 hydrolase activity; GO:0016298 lipase activity; GO:0004871 signal transducer activity; GO:0004435 phosphatidylinositol phospholipase C activity; GO:0042578 phosphoric ester hydrolase activity; GO:0003824 catalytic activity; GO:0005488 binding; GO:0016788 hydrolase activity, acting on ester bonds; G…	K05858	PLCB; phosphatidylinositol phospholipase C, beta [EC:3.1.4.11]	hsa00562 Inositol phosphate metabolism; hsa01100 Metabolic pathways; hsa04015 Rap1 signaling pathway; hsa04020 Calcium signaling pathway; hsa04022 cGMP-PKG signaling pathway; hsa04062 Chemokine signaling pathway; hsa04070 Phosphatidylinositol signaling system; hsa04071 Sphingolipid signaling pathway; hsa04072 Phospholipase D signaling pathway; hsa04261 Adrenergic signaling in cardiomyocytes; hsa0…	IPR000909; IPR015359; IPR011992; IPR001711; IPR017946; IPR011993; IPR000008; IPR014815;	Phosphatidylinositol-specific phospholipase C, X domain; Phosphoinositide-specific phospholipase C, EF-hand-like domain; EF-hand domain pair; Phospholipase C, phosphatidylinositol-specific, Y domain; PLC-like phosphodiesterase, TIM beta/alpha-barrel domain; PH domain-like; C2 domain; Phospholipase C-beta, C-terminal domain;
Q9GZM7	Tubulointerstitial nephritis antigen-like OS=Homo sapiens OX=9606 GN=TINAGL1 PE=1 SV=1	1.779	Up	0.032477	TINAGL1	52.387				0.602	0.557				1.132	0.93	extracellular	GO:0016192 vesicle-mediated transport; GO:0002376 immune system process; GO:0050896 response to stimulus; GO:0006897 endocytosis; GO:0044238 primary metabolic process; GO:0071704 organic substance metabolic process; GO:0051234 establishment of localization; GO:0006810 transport; GO:0016197 endosomal transport; GO:0022610 biological adhesion; GO:0008152 metabolic process; GO:0007155 cell adhesion;…	GO:0005615 extracellular space; GO:0044421 extracellular region part; GO:0031982 vesicle; GO:0005737 cytoplasm; GO:0044424 intracellular part; GO:0005623 cell; GO:0005576 extracellular region; GO:0031012 extracellular matrix; GO:0043226 organelle; GO:0070062 extracellular exosome; GO:0005622 intracellular; GO:0044464 cell part; GO:1903561 extracellular vesicle; GO:0043227 membrane-bounded organel…	GO:0008233 peptidase activity; GO:0038024 cargo receptor activity; GO:0005515 protein binding; GO:0005044 scavenger receptor activity; GO:0016787 hydrolase activity; GO:0008234 cysteine-type peptidase activity; GO:0050840 extracellular matrix binding; GO:0005201 extracellular matrix structural constituent; GO:0060089 molecular transducer activity; GO:0004872 receptor activity; GO:0030247 polysacc…				IPR000668; IPR001212;	Peptidase C1A, papain C-terminal; Somatomedin B domain;
Q15274	Nicotinate-nucleotide pyrophosphorylase [carboxylating] OS=Homo sapiens OX=9606 GN=QPRT PE=1 SV=3	0.476	Down	0.035138	QPRT	30.845	3.198	3.65	5.015			2.475	1.232	1.938			extracellular	GO:0044085 cellular component biogenesis; GO:0051188 cofactor biosynthetic process; GO:0019362 pyridine nucleotide metabolic process; GO:0009117 nucleotide metabolic process; GO:0044699 single-organism process; GO:0009058 biosynthetic process; GO:0019363 pyridine nucleotide biosynthetic process; GO:0044237 cellular metabolic process; GO:0072524 pyridine-containing compound metabolic process; GO:0…	GO:0070062 extracellular exosome; GO:0043226 organelle; GO:0044421 extracellular region part; GO:0044464 cell part; GO:0005622 intracellular; GO:0005737 cytoplasm; GO:0031982 vesicle; GO:1903561 extracellular vesicle; GO:0044424 intracellular part; GO:0005829 cytosol; GO:0005623 cell; GO:0043227 membrane-bounded organelle; GO:0005576 extracellular region; GO:0043230 extracellular organelle; GO:00…	GO:0016763 transferase activity, transferring pentosyl groups; GO:0042802 identical protein binding; GO:0003824 catalytic activity; GO:0042803 protein homodimerization activity; GO:0005488 binding; GO:0046983 protein dimerization activity; GO:0016757 transferase activity, transferring glycosyl groups; GO:0005515 protein binding; GO:0004514 nicotinate-nucleotide diphosphorylase (carboxylating) act…	K00767	nadC, QPRT; nicotinate-nucleotide pyrophosphorylase (carboxylating) [EC:2.4.2.19]	hsa00760 Nicotinate and nicotinamide metabolism; hsa01100 Metabolic pathways	IPR013785; IPR002638; IPR022412;	Aldolase-type TIM barrel; Quinolinate phosphoribosyl transferase, C-terminal; Quinolinate phosphoribosyl transferase, N-terminal;
Q14247	Src substrate cortactin OS=Homo sapiens OX=9606 GN=CTTN PE=1 SV=2	0.504	Down	0.021497	CTTN	61.585	1.067	0.938	1.898	1.606	2.78	1.071	0.599	0.853	0.902	0.755	cytoplasm	GO:0044085 cellular component biogenesis; GO:0065008 regulation of biological quality; GO:0010941 regulation of cell death; GO:0032989 cellular component morphogenesis; GO:0045933 positive regulation of muscle contraction; GO:0030832 regulation of actin filament length; GO:0010821 regulation of mitochondrion organization; GO:0015031 protein transport; GO:0030041 actin filament polymerization; GO:…	GO:0016020 membrane; GO:0030425 dendrite; GO:0044421 extracellular region part; GO:0051233 spindle midzone; GO:0005737 cytoplasm; GO:0099568 cytoplasmic region; GO:0032991 macromolecular complex; GO:0005887 integral component of plasma membrane; GO:0005623 cell; GO:0044422 organelle part; GO:0043197 dendritic spine; GO:0043228 non-membrane-bounded organelle; GO:0070062 extracellular exosome; GO:0…	GO:0005522 profilin binding; GO:0050839 cell adhesion molecule binding; GO:0005515 protein binding; GO:0005488 binding; GO:0045296 cadherin binding;	K06106	CTTN, EMS1; cortactin	hsa04530 Tight junction; hsa05100 Bacterial invasion of epithelial cells; hsa05130 Pathogenic Escherichia coli infection; hsa05131 Shigellosis; hsa05205 Proteoglycans in cancer	IPR001452;	SH3 domain;
P02745	Complement C1q subcomponent subunit A OS=Homo sapiens OX=9606 GN=C1QA PE=1 SV=2	7.61	Up	0.0090171	C1QA	26.016	0.643	0.329	0.217	0.277	0.156	1.687	0.54	7.678	1.031	1.407	extracellular	GO:0044700 single organism signaling; GO:0016064 immunoglobulin mediated immune response; GO:0002252 immune effector process; GO:0044699 single-organism process; GO:0006959 humoral immune response; GO:0050896 response to stimulus; GO:0045087 innate immune response; GO:0019724 B cell mediated immunity; GO:0071704 organic substance metabolic process; GO:0006956 complement activation; GO:0008152 met…	GO:0070062 extracellular exosome; GO:0043226 organelle; GO:0005615 extracellular space; GO:0044421 extracellular region part; GO:0031982 vesicle; GO:1903561 extracellular vesicle; GO:0032991 macromolecular complex; GO:0005602 complement component C1 complex; GO:0043234 protein complex; GO:0043227 membrane-bounded organelle; GO:0005576 extracellular region; GO:0005581 collagen trimer; GO:0043230 e…	GO:0004252 serine-type endopeptidase activity; GO:0004175 endopeptidase activity; GO:0008233 peptidase activity; GO:0003824 catalytic activity; GO:0017171 serine hydrolase activity; GO:0005488 binding; GO:0008236 serine-type peptidase activity; GO:0070011 peptidase activity, acting on L-amino acid peptides; GO:0005515 protein binding; GO:0016787 hydrolase activity;	K03986	C1QA; complement C1q subcomponent subunit A	hsa04610 Complement and coagulation cascades; hsa05020 Prion diseases; hsa05133 Pertussis; hsa05142 Chagas disease (American trypanosomiasis); hsa05150 Staphylococcus aureus infection; hsa05322 Systemic lupus erythematosus	IPR008983; IPR001073;	Tumour necrosis factor-like domain; C1q domain;
Q9BXT6	RNA helicase Mov10l1 OS=Homo sapiens OX=9606 GN=MOV10L1 PE=2 SV=1	0.13	Down	0.0067997	MOV10L1	135.29	5.225	1.702	4.064			0.453	0.634	0.345			cytoplasm	GO:0022414 reproductive process; GO:0048869 cellular developmental process; GO:0044699 single-organism process; GO:0044237 cellular metabolic process; GO:0032259 methylation; GO:0008152 metabolic process; GO:0044702 single organism reproductive process; GO:0007140 male meiosis; GO:0043170 macromolecule metabolic process; GO:0032502 developmental process; GO:0003006 developmental process involved …	GO:0043229 intracellular organelle; GO:0043232 intracellular non-membrane-bounded organelle; GO:0005737 cytoplasm; GO:0032991 macromolecular complex; GO:0045495 pole plasm; GO:0044424 intracellular part; GO:0071546 pi-body; GO:0005623 cell; GO:0043186 P granule; GO:0036464 cytoplasmic ribonucleoprotein granule; GO:0043228 non-membrane-bounded organelle; GO:0043226 organelle; GO:0005622 intracellu…	GO:1901265 nucleoside phosphate binding; GO:0008026 ATP-dependent helicase activity; GO:0016817 hydrolase activity, acting on acid anhydrides; GO:0016787 hydrolase activity; GO:0016887 ATPase activity; GO:1901363 heterocyclic compound binding; GO:0097159 organic cyclic compound binding; GO:0016462 pyrophosphatase activity; GO:0003824 catalytic activity; GO:0032553 ribonucleotide binding; GO:00054…	K13983	MOV10L1; putative helicase MOV10L1 [EC:3.6.4.13]		IPR027417;	P-loop containing nucleoside triphosphate hydrolase;
P04180	Phosphatidylcholine-sterol acyltransferase OS=Homo sapiens OX=9606 GN=LCAT PE=1 SV=1	1.947	Up	0.02846	LCAT	49.577	1.166	1.089	0.57	1.125	0.31	1.494	1.198	1.413	2.214	1.977	extracellular	GO:0034367 macromolecular complex remodeling; GO:0046470 phosphatidylcholine metabolic process; GO:0065008 regulation of biological quality; GO:0015850 organic hydroxy compound transport; GO:0046486 glycerolipid metabolic process; GO:0030301 cholesterol transport; GO:0006066 alcohol metabolic process; GO:0008654 phospholipid biosynthetic process; GO:0044699 single-organism process; GO:0009058 bio…	GO:0070062 extracellular exosome; GO:0043226 organelle; GO:0005615 extracellular space; GO:0044421 extracellular region part; GO:0032994 protein-lipid complex; GO:1990777 lipoprotein particle; GO:0031982 vesicle; GO:1903561 extracellular vesicle; GO:0034358 plasma lipoprotein particle; GO:0032991 macromolecular complex; GO:0034364 high-density lipoprotein particle; GO:0043227 membrane-bounded org…	GO:0016746 transferase activity, transferring acyl groups; GO:0034185 apolipoprotein binding; GO:0003824 catalytic activity; GO:0005488 binding; GO:0005515 protein binding; GO:0034186 apolipoprotein A-I binding; GO:0016740 transferase activity; GO:0016747 transferase activity, transferring acyl groups other than amino-acyl groups; GO:0004607 phosphatidylcholine-sterol O-acyltransferase activity; …	K00650	LCAT; lecithin-cholesterol acyltransferase [EC:2.3.1.43]	hsa00564 Glycerophospholipid metabolism; hsa04979 Cholesterol metabolism	IPR029058;	Alpha/Beta hydrolase fold;
Q9UBR2	Cathepsin Z OS=Homo sapiens OX=9606 GN=CTSZ PE=1 SV=1	2.71	Up	0.0135366	CTSZ	33.868	0.473	0.879	0.776	0.303	0.145	0.977	1.218	1.371	2.295	1.119	extracellular	GO:0044085 cellular component biogenesis; GO:0065008 regulation of biological quality; GO:0045321 leukocyte activation; GO:0006518 peptide metabolic process; GO:0048208 COPII vesicle coating; GO:0030323 respiratory tube development; GO:0016486 peptide hormone processing; GO:0060177 regulation of angiotensin metabolic process; GO:0044237 cellular metabolic process; GO:0048754 branching morphogenes…	GO:0034774 secretory granule lumen; GO:0016020 membrane; GO:0005615 extracellular space; GO:0044421 extracellular region part; GO:0005783 endoplasmic reticulum; GO:0031410 cytoplasmic vesicle; GO:0031090 organelle membrane; GO:0071944 cell periphery; GO:0031982 vesicle; GO:0005737 cytoplasm; GO:0044433 cytoplasmic vesicle part; GO:0044424 intracellular part; GO:0005623 cell; GO:1904813 ficolin-1-…	GO:0004175 endopeptidase activity; GO:0008233 peptidase activity; GO:0003824 catalytic activity; GO:0005488 binding; GO:0070011 peptidase activity, acting on L-amino acid peptides; GO:0016787 hydrolase activity; GO:0008234 cysteine-type peptidase activity; GO:0005515 protein binding; GO:0004197 cysteine-type endopeptidase activity;	K08568	CTSZ; cathepsin X [EC:3.4.18.1]	hsa04142 Lysosome; hsa04210 Apoptosis	IPR000668;	Peptidase C1A, papain C-terminal;
P43251	Biotinidase OS=Homo sapiens OX=9606 GN=BTD PE=1 SV=2	2.528	Up	0.0114403	BTD	61.132				0.463	0.486				1.315	1.084	extracellular	GO:0044707 single-multicellular organism process; GO:0006768 biotin metabolic process; GO:0044699 single-organism process; GO:0044237 cellular metabolic process; GO:0071704 organic substance metabolic process; GO:0006766 vitamin metabolic process; GO:0008152 metabolic process; GO:0046483 heterocycle metabolic process; GO:0032787 monocarboxylic acid metabolic process; GO:0034641 cellular nitrogen …	GO:0005759 mitochondrial matrix; GO:0043229 intracellular organelle; GO:0005615 extracellular space; GO:0044421 extracellular region part; GO:0044429 mitochondrial part; GO:0005737 cytoplasm; GO:0044446 intracellular organelle part; GO:0031982 vesicle; GO:0044424 intracellular part; GO:0005623 cell; GO:0005576 extracellular region; GO:0044422 organelle part; GO:0005739 mitochondrion; GO:0043231 i…	GO:0047708 biotinidase activity; GO:0016787 hydrolase activity; GO:0016811 hydrolase activity, acting on carbon-nitrogen (but not peptide) bonds, in linear amides; GO:0003824 catalytic activity; GO:0016810 hydrolase activity, acting on carbon-nitrogen (but not peptide) bonds;	K01435	BTD; biotinidase [EC:3.5.1.12]	hsa00780 Biotin metabolism; hsa01100 Metabolic pathways; hsa04977 Vitamin digestion and absorption	IPR003010;	Carbon-nitrogen hydrolase;
O95834	Echinoderm microtubule-associated protein-like 2 OS=Homo sapiens OX=9606 GN=EML2 PE=1 SV=1	0.561	Down	0.033501	EML2	70.678	1.613	2.911	1.413	1.005	1.266	1.112	1.037	1.061	0.688	0.703	plasma membrane	GO:0050794 regulation of cellular process; GO:0031111 negative regulation of microtubule polymerization or depolymerization; GO:0007601 visual perception; GO:0051129 negative regulation of cellular component organization; GO:0044087 regulation of cellular component biogenesis; GO:0048519 negative regulation of biological process; GO:0048523 negative regulation of cellular process; GO:0031110 regu…	GO:0043229 intracellular organelle; GO:0099513 polymeric cytoskeletal fiber; GO:0005874 microtubule; GO:0043232 intracellular non-membrane-bounded organelle; GO:0044430 cytoskeletal part; GO:0005737 cytoplasm; GO:0044446 intracellular organelle part; GO:0032991 macromolecular complex; GO:0099512 supramolecular fiber; GO:0044424 intracellular part; GO:0005875 microtubule associated complex; GO:009…	GO:0008092 cytoskeletal protein binding; GO:0005102 receptor binding; GO:0008017 microtubule binding; GO:0005488 binding; GO:0015631 tubulin binding; GO:0005515 protein binding; GO:0008022 protein C-terminus binding;	K18595	EML1_2; echinoderm microtubule-associated protein-like 1/2		IPR005108; IPR017986; IPR015943; IPR011047;	HELP; WD40-repeat-containing domain; WD40/YVTN repeat-like-containing domain; Quinoprotein alcohol dehydrogenase-like superfamily;
Q9UHN6	Cell surface hyaluronidase OS=Homo sapiens OX=9606 GN=CEMIP2 PE=1 SV=1	2.009	Up	0.046661	CEMIP2	154.37	0.552	0.309	0.329			0.678	1.077	0.636			plasma membrane	GO:0032502 developmental process; GO:0044707 single-multicellular organism process; GO:0044767 single-organism developmental process; GO:0044699 single-organism process; GO:0007275 multicellular organism development; GO:0032501 multicellular organismal process; GO:0048856 anatomical structure development;	GO:0016020 membrane; GO:0070062 extracellular exosome; GO:0043226 organelle; GO:0044421 extracellular region part; GO:0044425 membrane part; GO:0031982 vesicle; GO:1903561 extracellular vesicle; GO:0031224 intrinsic component of membrane; GO:0043227 membrane-bounded organelle; GO:0016021 integral component of membrane; GO:0005576 extracellular region; GO:0043230 extracellular organelle;	GO:0050839 cell adhesion molecule binding; GO:0005515 protein binding; GO:0005488 binding; GO:0045296 cadherin binding;	K22144	TEME2; cell surface hyaluronidase [EC:3.2.1.35]		IPR011050; IPR019316;	Pectin lyase fold/virulence factor; G8 domain;
Q92692	Nectin-2 OS=Homo sapiens OX=9606 GN=NECTIN2 PE=1 SV=1	1.656	Up	0.0053778	NECTIN2	57.741	0.833	0.97	0.577	0.732	0.888	1.178	1.682	1.13	1.597	1.039	extracellular	GO:0044409 entry into host; GO:0044700 single organism signaling; GO:0044085 cellular component biogenesis; GO:0002694 regulation of leukocyte activation; GO:0022414 reproductive process; GO:0002824 positive regulation of adaptive immune response based on somatic recombination of immune receptors built from immunoglobulin superfamily domains; GO:0032989 cellular component morphogenesis; GO:003134…	GO:0016020 membrane; GO:0044421 extracellular region part; GO:0071944 cell periphery; GO:0044291 cell-cell contact zone; GO:0030054 cell junction; GO:0031982 vesicle; GO:0031224 intrinsic component of membrane; GO:0005887 integral component of plasma membrane; GO:0005913 cell-cell adherens junction; GO:0005623 cell; GO:0005911 cell-cell junction; GO:0070062 extracellular exosome; GO:0005925 focal…	GO:0038023 signaling receptor activity; GO:0050839 cell adhesion molecule binding; GO:0060089 molecular transducer activity; GO:0042802 identical protein binding; GO:0004872 receptor activity; GO:0046982 protein heterodimerization activity; GO:0005102 receptor binding; GO:0042803 protein homodimerization activity; GO:0015026 coreceptor activity; GO:0005488 binding; GO:0046983 protein dimerization…	K06531	PVRL2, CD112; poliovirus receptor-related protein 2	hsa04514 Cell adhesion molecules (CAMs); hsa04520 Adherens junction	IPR007110; IPR013783; IPR013162; IPR003599; IPR013106;	Immunoglobulin-like domain; Immunoglobulin-like fold; CD80-like, immunoglobulin C2-set; Immunoglobulin subtype; Immunoglobulin V-set domain;
Q96CX2	BTB/POZ domain-containing protein KCTD12 OS=Homo sapiens OX=9606 GN=KCTD12 PE=1 SV=1	0.607	Down	0.024256	KCTD12	35.7	2.101	1.286	1.248	1.156	0.847	0.739	0.596	0.978	0.878	0.84	nucleus	GO:0044085 cellular component biogenesis; GO:0016043 cellular component organization; GO:0071822 protein complex subunit organization; GO:0051260 protein homooligomerization; GO:0022607 cellular component assembly; GO:0065003 macromolecular complex assembly; GO:0070271 protein complex biogenesis; GO:0009987 cellular process; GO:0006461 protein complex assembly; GO:0071840 cellular component organ…	GO:0016020 membrane; GO:0044421 extracellular region part; GO:0071944 cell periphery; GO:0030054 cell junction; GO:0031982 vesicle; GO:0005623 cell; GO:0042734 presynaptic membrane; GO:0005576 extracellular region; GO:0045202 synapse; GO:0005886 plasma membrane; GO:0045211 postsynaptic membrane; GO:0043226 organelle; GO:0070062 extracellular exosome; GO:0098794 postsynapse; GO:0044459 plasma memb…	GO:0097159 organic cyclic compound binding; GO:1901363 heterocyclic compound binding; GO:0003723 RNA binding; GO:0005515 protein binding; GO:0042802 identical protein binding; GO:0005488 binding; GO:0003676 nucleic acid binding;	K21918	KCTD8_12_16; BTB/POZ domain-containing protein KCTD8/12/16		IPR011333; IPR003131; IPR000210;	SKP1/BTB/POZ domain; Potassium channel tetramerisation-type BTB domain; BTB/POZ domain;
O75348	V-type proton ATPase subunit G 1 OS=Homo sapiens OX=9606 GN=ATP6V1G1 PE=1 SV=3	0.321	Down	0.0128358	ATP6V1G1	13.757	3.898	2.631	2.053	2.737	1.181	2.086	0.312	0.95	0.268	0.4	nucleus	GO:0044700 single organism signaling; GO:0065008 regulation of biological quality; GO:0008286 insulin receptor signaling pathway; GO:0007166 cell surface receptor signaling pathway; GO:0030641 regulation of cellular pH; GO:0030004 cellular monovalent inorganic cation homeostasis; GO:0044699 single-organism process; GO:0015031 protein transport; GO:0051234 establishment of localization; GO:0000041…	GO:0016020 membrane; GO:0044421 extracellular region part; GO:0031090 organelle membrane; GO:0071944 cell periphery; GO:0098796 membrane protein complex; GO:0031982 vesicle; GO:0005737 cytoplasm; GO:0032991 macromolecular complex; GO:0044424 intracellular part; GO:0033176 proton-transporting V-type ATPase complex; GO:0005623 cell; GO:0044422 organelle part; GO:0070062 extracellular exosome; GO:00…	GO:0042625 ATPase coupled ion transmembrane transporter activity; GO:0015399 primary active transmembrane transporter activity; GO:0022892 substrate-specific transporter activity; GO:0016817 hydrolase activity, acting on acid anhydrides; GO:0015077 monovalent inorganic cation transmembrane transporter activity; GO:0005515 protein binding; GO:0016787 hydrolase activity; GO:0015078 hydrogen ion tra…	K02152	ATPeV1G, ATP6G; V-type H+-transporting ATPase subunit G	hsa00190 Oxidative phosphorylation; hsa01100 Metabolic pathways; hsa04145 Phagosome; hsa04150 mTOR signaling pathway; hsa04721 Synaptic vesicle cycle; hsa04966 Collecting duct acid secretion; hsa05110 Vibrio cholerae infection; hsa05120 Epithelial cell signaling in Helicobacter pylori infection; hsa05165 Human papillomavirus infection; hsa05323 Rheumatoid arthritis
P42345	Serine/threonine-protein kinase mTOR OS=Homo sapiens OX=9606 GN=MTOR PE=1 SV=1	0.247	Down	0.021077	MTOR	288.89	1.76	2.66	1.266				0.55	0.385			plasma membrane	GO:0044700 single organism signaling; GO:0002694 regulation of leukocyte activation; GO:0014013 regulation of gliogenesis; GO:0022414 reproductive process; GO:0010608 posttranscriptional regulation of gene expression; GO:0014742 positive regulation of muscle hypertrophy; GO:0032104 regulation of response to extracellular stimulus; GO:0003179 heart valve morphogenesis; GO:0044237 cellular metaboli…	GO:0016020 membrane; GO:0030425 dendrite; GO:0019867 outer membrane; GO:0019898 extrinsic component of membrane; GO:0031090 organelle membrane; GO:0005737 cytoplasm; GO:0043025 neuronal cell body; GO:0032991 macromolecular complex; GO:0005623 cell; GO:0044422 organelle part; GO:0005765 lysosomal membrane; GO:0016605 PML body; GO:0005654 nucleoplasm; GO:0005622 intracellular; GO:0005764 lysosome; …	GO:0000182 rDNA binding; GO:1901265 nucleoside phosphate binding; GO:0080084 5S rDNA binding; GO:0016773 phosphotransferase activity, alcohol group as acceptor; GO:0003690 double-stranded DNA binding; GO:0019901 protein kinase binding; GO:0001016 RNA polymerase III regulatory region DNA binding; GO:0005515 protein binding; GO:0004672 protein kinase activity; GO:0001032 RNA polymerase III type 3 p…	K07203	MTOR, FRAP, TOR; serine/threonine-protein kinase mTOR [EC:2.7.11.1]	hsa01521 EGFR tyrosine kinase inhibitor resistance; hsa01522 Endocrine resistance; hsa04012 ErbB signaling pathway; hsa04066 HIF-1 signaling pathway; hsa04072 Phospholipase D signaling pathway; hsa04136 Autophagy - other; hsa04140 Autophagy - animal; hsa04150 mTOR signaling pathway; hsa04151 PI3K-Akt signaling pathway; hsa04152 AMPK signaling pathway; hsa04211 Longevity regulating pathway; hsa042…	IPR000403; IPR011990; IPR011989; IPR009076; IPR024585; IPR011009; IPR003151; IPR014009; IPR016024; IPR003152;	Phosphatidylinositol 3-/4-kinase, catalytic domain; Tetratricopeptide-like helical domain; Armadillo-like helical; FKBP12-rapamycin binding domain; Domain of unknown function DUF3385, target of rapamycin protein; Protein kinase-like domain; PIK-related kinase, FAT; PIK-related kinase; Armadillo-type fold; FATC domain;
O95747	Serine/threonine-protein kinase OSR1 OS=Homo sapiens OX=9606 GN=OXSR1 PE=1 SV=1	0.534	Down	0.0040013	OXSR1	58.022	1.848	1.311	1.36	1.02	1.043		0.621	0.587	0.885	0.72	cytoplasm	GO:0044700 single organism signaling; GO:2000681 negative regulation of rubidium ion transport; GO:1901017 negative regulation of potassium ion transmembrane transporter activity; GO:0044699 single-organism process; GO:0006971 hypotonic response; GO:0044237 cellular metabolic process; GO:0006796 phosphate-containing compound metabolic process; GO:0007165 signal transduction; GO:0008152 metabolic …	GO:0044421 extracellular region part; GO:0031982 vesicle; GO:0005737 cytoplasm; GO:0044424 intracellular part; GO:0005623 cell; GO:0005829 cytosol; GO:0005576 extracellular region; GO:0043226 organelle; GO:0070062 extracellular exosome; GO:0005622 intracellular; GO:0044464 cell part; GO:1903561 extracellular vesicle; GO:0043227 membrane-bounded organelle; GO:0043230 extracellular organelle; GO:00…	GO:1901265 nucleoside phosphate binding; GO:0016773 phosphotransferase activity, alcohol group as acceptor; GO:0005515 protein binding; GO:0004672 protein kinase activity; GO:0004702 signal transducer, downstream of receptor, with serine/threonine kinase activity; GO:0004871 signal transducer activity; GO:0097159 organic cyclic compound binding; GO:1901363 heterocyclic compound binding; GO:001630…	K08835	OXSR1, STK39; serine/threonine-protein kinase OSR1/STK39 [EC:2.7.11.1]		IPR000719; IPR011009; IPR024678;	Protein kinase domain; Protein kinase-like domain; Serine/threonine-protein kinase OSR1/WNK, CCT domain;
P02790	Hemopexin OS=Homo sapiens OX=9606 GN=HPX PE=1 SV=2	2.874	Up	0.038715	HPX	51.676	0.972	0.528	0.412	0.716	0.366	1.049	0.656	4.078	0.963	1.858	extracellular	GO:0065008 regulation of biological quality; GO:0032270 positive regulation of cellular protein metabolic process; GO:0002824 positive regulation of adaptive immune response based on somatic recombination of immune receptors built from immunoglobulin superfamily domains; GO:0060330 regulation of response to interferon-gamma; GO:0031347 regulation of defense response; GO:0060332 positive regulatio…	GO:0043229 intracellular organelle; GO:0097708 intracellular vesicle; GO:0005615 extracellular space; GO:0044421 extracellular region part; GO:0031410 cytoplasmic vesicle; GO:0005737 cytoplasm; GO:0044446 intracellular organelle part; GO:0031982 vesicle; GO:0044433 cytoplasmic vesicle part; GO:0044424 intracellular part; GO:0005623 cell; GO:0005576 extracellular region; GO:0044422 organelle part;…	GO:0015232 heme transporter activity; GO:0005488 binding; GO:0043167 ion binding; GO:0043169 cation binding; GO:0046872 metal ion binding; GO:0005515 protein binding; GO:0051184 cofactor transporter activity; GO:0005215 transporter activity;	K18977	HPX; hemopexin		IPR000585;	Hemopexin-like domain;
P17900	Ganglioside GM2 activator OS=Homo sapiens OX=9606 GN=GM2A PE=1 SV=4	2.124	Up	0.02922	GM2A	20.838	0.369	0.454	0.783	0.748	0.726	1.107	1.895	0.544	1.72	1.276	extracellular	GO:0065008 regulation of biological quality; GO:0045321 leukocyte activation; GO:0019377 glycolipid catabolic process; GO:0006643 membrane lipid metabolic process; GO:0006672 ceramide metabolic process; GO:0044699 single-organism process; GO:0044255 cellular lipid metabolic process; GO:0044237 cellular metabolic process; GO:0006689 ganglioside catabolic process; GO:0050877 neurological system pro…	GO:0016020 membrane; GO:0044421 extracellular region part; GO:0005737 cytoplasm; GO:0099568 cytoplasmic region; GO:0044433 cytoplasmic vesicle part; GO:0032991 macromolecular complex; GO:0005887 integral component of plasma membrane; GO:0035578 azurophil granule lumen; GO:0005623 cell; GO:0090533 cation-transporting ATPase complex; GO:0009898 cytoplasmic side of plasma membrane; GO:0044422 organe…	GO:0005319 lipid transporter activity; GO:0004553 hydrolase activity, hydrolyzing O-glycosyl compounds; GO:0022892 substrate-specific transporter activity; GO:0016787 hydrolase activity; GO:0016004 phospholipase activator activity; GO:0098772 molecular function regulator; GO:0032428 beta-N-acetylgalactosaminidase activity; GO:0030234 enzyme regulator activity; GO:0003824 catalytic activity; GO:00…	K12383	GM2A; ganglioside GM2 activator	hsa04142 Lysosome	IPR003172;	MD-2-related lipid-recognition domain;
P49006	MARCKS-related protein OS=Homo sapiens OX=9606 GN=MARCKSL1 PE=1 SV=2	0.258	Down	0.0092999	MARCKSL1	19.529	1.421	1.704	3.21	1.773	6.497	1.403	0.436	0.444	1.124	0.362	nucleus	GO:0050794 regulation of cellular process; GO:0050789 regulation of biological process; GO:0042127 regulation of cell proliferation; GO:0048522 positive regulation of cellular process; GO:0048518 positive regulation of biological process; GO:0065007 biological regulation; GO:0008284 positive regulation of cell proliferation;	GO:0016020 membrane; GO:0044421 extracellular region part; GO:0071944 cell periphery; GO:0005737 cytoplasm; GO:0031982 vesicle; GO:0044424 intracellular part; GO:0005623 cell; GO:0005576 extracellular region; GO:0005886 plasma membrane; GO:0043226 organelle; GO:0070062 extracellular exosome; GO:0005622 intracellular; GO:0044464 cell part; GO:1903561 extracellular vesicle; GO:0043227 membrane-boun…	GO:0003779 actin binding; GO:0005515 protein binding; GO:0008092 cytoskeletal protein binding; GO:0005516 calmodulin binding; GO:0005488 binding;	K13536	MARCKSL1, MRP; MARCKS-related protein	hsa04666 Fc gamma R-mediated phagocytosis; hsa05140 Leishmaniasis
Q96PD5	N-acetylmuramoyl-L-alanine amidase OS=Homo sapiens OX=9606 GN=PGLYRP2 PE=1 SV=1	0.213	Down	0.0002643	PGLYRP2	62.216	3.681	2.603	3.612			0.686	0.641	0.784			extracellular	GO:0044700 single organism signaling; GO:0002694 regulation of leukocyte activation; GO:0051093 negative regulation of developmental process; GO:0006518 peptide metabolic process; GO:0000270 peptidoglycan metabolic process; GO:0006026 aminoglycan catabolic process; GO:0002698 negative regulation of immune effector process; GO:0098542 defense response to other organism; GO:0044699 single-organism …	GO:0070062 extracellular exosome; GO:0043226 organelle; GO:0016020 membrane; GO:0044421 extracellular region part; GO:0005622 intracellular; GO:0044464 cell part; GO:0031982 vesicle; GO:1903561 extracellular vesicle; GO:0005623 cell; GO:0043227 membrane-bounded organelle; GO:0005576 extracellular region; GO:0043230 extracellular organelle;	GO:0038023 signaling receptor activity; GO:0042834 peptidoglycan binding; GO:0043167 ion binding; GO:0016019 peptidoglycan receptor activity; GO:0016787 hydrolase activity; GO:0008745 N-acetylmuramoyl-L-alanine amidase activity; GO:0008270 zinc ion binding; GO:0004871 signal transducer activity; GO:0097367 carbohydrate derivative binding; GO:0060089 molecular transducer activity; GO:0004872 recep…	K01446	PGRP; peptidoglycan recognition protein		IPR002502; IPR006619;	N-acetylmuramoyl-L-alanine amidase domain; Peptidoglycan recognition protein family domain, metazoa/bacteria;
Q13576	Ras GTPase-activating-like protein IQGAP2 OS=Homo sapiens OX=9606 GN=IQGAP2 PE=1 SV=4	2.138	Up	0.0025644	IQGAP2	180.58	0.648	0.563	0.478	0.492	0.604	0.889	1.954	1.052	0.812	1.247	nucleus	GO:0044700 single organism signaling; GO:0030833 regulation of actin filament polymerization; GO:0034314 Arp2/3 complex-mediated actin nucleation; GO:0065008 regulation of biological quality; GO:0045321 leukocyte activation; GO:0032273 positive regulation of protein polymerization; GO:0044699 single-organism process; GO:0030832 regulation of actin filament length; GO:0051234 establishment of loca…	GO:0016020 membrane; GO:0044421 extracellular region part; GO:0005874 microtubule; GO:0031090 organelle membrane; GO:0031410 cytoplasmic vesicle; GO:0071944 cell periphery; GO:0031982 vesicle; GO:0005737 cytoplasm; GO:0044433 cytoplasmic vesicle part; GO:0099512 supramolecular fiber; GO:0044424 intracellular part; GO:0098858 actin-based cell projection; GO:0005623 cell; GO:0099080 supramolecular …	GO:0031267 small GTPase binding; GO:0051015 actin filament binding; GO:1901981 phosphatidylinositol phosphate binding; GO:0017048 Rho GTPase binding; GO:0048365 Rac GTPase binding; GO:0060589 nucleoside-triphosphatase regulator activity; GO:0071933 Arp2/3 complex binding; GO:0043167 ion binding; GO:0030695 GTPase regulator activity; GO:0044877 macromolecular complex binding; GO:0005515 protein bi…	K05767	IQGAP2_3; Ras GTPase-activating-like protein IQGAP2/3	hsa04810 Regulation of actin cytoskeleton	IPR001936; IPR001202; IPR001715; IPR000593; IPR008936;	Ras GTPase-activating protein; WW domain; Calponin homology domain; RasGAP protein, C-terminal; Rho GTPase activation protein;
P52943	Cysteine-rich protein 2 OS=Homo sapiens OX=9606 GN=CRIP2 PE=1 SV=1	0.258	Down	0.033685	CRIP2	22.492	0.688	1.289	5.9	1.288	3.342	0.335	0.278	0.843	1.001	0.765	nucleus	GO:0050794 regulation of cellular process; GO:0032502 developmental process; GO:0044707 single-multicellular organism process; GO:0042127 regulation of cell proliferation; GO:0048731 system development; GO:0048522 positive regulation of cellular process; GO:0044699 single-organism process; GO:0002520 immune system development; GO:0002376 immune system process; GO:0048518 positive regulation of bi…	GO:0005938 cell cortex; GO:0044464 cell part; GO:0005622 intracellular; GO:0071944 cell periphery; GO:0005737 cytoplasm; GO:0099568 cytoplasmic region; GO:0044424 intracellular part; GO:0005623 cell; GO:0044444 cytoplasmic part;	GO:0046872 metal ion binding; GO:0043169 cation binding; GO:0008270 zinc ion binding; GO:0046914 transition metal ion binding; GO:0005488 binding; GO:0043167 ion binding;				IPR001781;	Zinc finger, LIM-type;
Q8TE67	Epidermal growth factor receptor kinase substrate 8-like protein 3 OS=Homo sapiens OX=9606 GN=EPS8L3 PE=1 SV=2	0.457	Down	0.0150578	EPS8L3	66.86				1.615	1.674				0.823	0.679	nucleus		GO:0044424 intracellular part; GO:0005623 cell; GO:0044464 cell part; GO:0005622 intracellular; GO:0005737 cytoplasm;	GO:0005515 protein binding; GO:0005488 binding;	K17277	EPS8; epidermal growth factor receptor kinase substrate 8		IPR013625; IPR001452; IPR011993; IPR033928;	Tensin/EPS8 phosphotyrosine-binding domain; SH3 domain; PH domain-like; Epidermal growth factor receptor kinase substrate, phosphotyrosine-binding domain;
P19652	Alpha-1-acid glycoprotein 2 OS=Homo sapiens OX=9606 GN=ORM2 PE=1 SV=2	2.615	Up	0.0062796	ORM2	23.602	0.359	0.52	0.265	0.898	0.565	1.282	2.447	1.06	1.056	0.972	extracellular	GO:0045321 leukocyte activation; GO:0002283 neutrophil activation involved in immune response; GO:0002252 immune effector process; GO:0002576 platelet degranulation; GO:0044699 single-organism process; GO:0050896 response to stimulus; GO:0051234 establishment of localization; GO:0002275 myeloid cell activation involved in immune response; GO:1902578 single-organism localization; GO:0036230 granul…	GO:0034774 secretory granule lumen; GO:0005615 extracellular space; GO:0044421 extracellular region part; GO:0031410 cytoplasmic vesicle; GO:0005737 cytoplasm; GO:0031982 vesicle; GO:0044433 cytoplasmic vesicle part; GO:0044424 intracellular part; GO:0035578 azurophil granule lumen; GO:0005623 cell; GO:0044422 organelle part; GO:0005775 vacuolar lumen; GO:0031974 membrane-enclosed lumen; GO:00700…		K17308	ORM1, AGP1; alpha-1-acid glycoprotein 1		IPR000566; IPR012674; IPR011038;	Lipocalin/cytosolic fatty-acid binding domain; Calycin; Calycin-like;
Q14789	Golgin subfamily B member 1 OS=Homo sapiens OX=9606 GN=GOLGB1 PE=1 SV=2	0.044	Down	0.042937	GOLGB1	376.01				2.441	6.105				0.104	0.276	peroxisome	GO:0050794 regulation of cellular process; GO:0046907 intracellular transport; GO:0016043 cellular component organization; GO:0010256 endomembrane system organization; GO:0060255 regulation of macromolecule metabolic process; GO:1905793 protein localization to pericentriolar material; GO:0019219 regulation of nucleobase-containing compound metabolic process; GO:1905508 protein localization to mic…	GO:0043229 intracellular organelle; GO:0016020 membrane; GO:0098588 bounding membrane of organelle; GO:0031090 organelle membrane; GO:0044446 intracellular organelle part; GO:0005801 cis-Golgi network; GO:0005737 cytoplasm; GO:0000139 Golgi membrane; GO:0031224 intrinsic component of membrane; GO:0005795 Golgi stack; GO:0012505 endomembrane system; GO:0044424 intracellular part; GO:0005623 cell; …	GO:0097159 organic cyclic compound binding; GO:1901363 heterocyclic compound binding; GO:0003677 DNA binding; GO:0003723 RNA binding; GO:0005488 binding; GO:0001071 nucleic acid binding transcription factor activity; GO:0003676 nucleic acid binding; GO:0005515 protein binding; GO:0043565 sequence-specific DNA binding; GO:0003700 transcription factor activity, sequence-specific DNA binding;	K20478	GOLGB1; golgin subfamily B member 1		IPR003106;	Leucine zipper, homeobox-associated;
Q9NQ76	Matrix extracellular phosphoglycoprotein OS=Homo sapiens OX=9606 GN=MEPE PE=1 SV=1	0.195	Down	0.022818	MEPE	58.418				2.008	1.359				0.277	0.379	extracellular	GO:0032502 developmental process; GO:0044707 single-multicellular organism process; GO:0051093 negative regulation of developmental process; GO:0009888 tissue development; GO:0030502 negative regulation of bone mineralization; GO:0048731 system development; GO:0044699 single-organism process; GO:0051241 negative regulation of multicellular organismal process; GO:0030500 regulation of bone mineral…	GO:0031012 extracellular matrix; GO:0044421 extracellular region part; GO:0005576 extracellular region; GO:0005578 proteinaceous extracellular matrix;	GO:1990430 extracellular matrix protein binding; GO:0005201 extracellular matrix structural constituent; GO:0005515 protein binding; GO:0005198 structural molecule activity; GO:0005488 binding;
Q15831	Serine/threonine-protein kinase STK11 OS=Homo sapiens OX=9606 GN=STK11 PE=1 SV=1	1.845	Up	0.0041782	STK11	48.635	0.789	0.755	0.649	0.478	0.622	0.847	1.582	1.451	0.93	1.267	cytoplasm	GO:0044085 cellular component biogenesis; GO:0044700 single organism signaling; GO:0022414 reproductive process; GO:0042593 glucose homeostasis; GO:0006914 autophagy; GO:0044237 cellular metabolic process; GO:0042110 T cell activation; GO:0001558 regulation of cell growth; GO:0071900 regulation of protein serine/threonine kinase activity; GO:0008152 metabolic process; GO:0065003 macromolecular co…	GO:0016020 membrane; GO:0044421 extracellular region part; GO:0031982 vesicle; GO:0005737 cytoplasm; GO:0032991 macromolecular complex; GO:0044424 intracellular part; GO:0005623 cell; GO:0044422 organelle part; GO:0031974 membrane-enclosed lumen; GO:0070062 extracellular exosome; GO:0005654 nucleoplasm; GO:0070013 intracellular organelle lumen; GO:0005622 intracellular; GO:0044464 cell part; GO:1…	GO:1901265 nucleoside phosphate binding; GO:0016773 phosphotransferase activity, alcohol group as acceptor; GO:0005515 protein binding; GO:0019207 kinase regulator activity; GO:0004672 protein kinase activity; GO:0098772 molecular function regulator; GO:1901363 heterocyclic compound binding; GO:0097159 organic cyclic compound binding; GO:0019209 kinase activator activity; GO:0016301 kinase activi…	K07298	STK11, LKB1; serine/threonine-protein kinase 11 [EC:2.7.11.1]	hsa04068 FoxO signaling pathway; hsa04140 Autophagy - animal; hsa04150 mTOR signaling pathway; hsa04151 PI3K-Akt signaling pathway; hsa04152 AMPK signaling pathway; hsa04211 Longevity regulating pathway; hsa04530 Tight junction; hsa04920 Adipocytokine signaling pathway	IPR000719; IPR011009;	Protein kinase domain; Protein kinase-like domain;
O00186	Syntaxin-binding protein 3 OS=Homo sapiens OX=9606 GN=STXBP3 PE=1 SV=2	3.605	Up	0.00072157	STXBP3	67.764	0.46	0.759	0.274	0.4	0.355	1.742	2.8	1.272	1.2	1.09	cytoplasm	GO:0044085 cellular component biogenesis; GO:0044700 single organism signaling; GO:0060627 regulation of vesicle-mediated transport; GO:0007596 blood coagulation; GO:0065008 regulation of biological quality; GO:0009914 hormone transport; GO:0045321 leukocyte activation; GO:0007420 brain development; GO:1903306 negative regulation of regulated secretory pathway; GO:0044699 single-organism process;…	GO:0016323 basolateral plasma membrane; GO:0016020 membrane; GO:0044421 extracellular region part; GO:0016324 apical plasma membrane; GO:0031410 cytoplasmic vesicle; GO:0071944 cell periphery; GO:0005737 cytoplasm; GO:0031982 vesicle; GO:0044424 intracellular part; GO:0005623 cell; GO:0070062 extracellular exosome; GO:0098590 plasma membrane region; GO:0005622 intracellular; GO:0044464 cell part;…	GO:0017075 syntaxin-1 binding; GO:0000149 SNARE binding; GO:0005515 protein binding; GO:0019905 syntaxin binding; GO:0005488 binding;	K15301	STXBP3, MUNC18-3; syntaxin-binding protein 3		IPR027482;	Sec1-like, domain 2;
P28070	Proteasome subunit beta type-4 OS=Homo sapiens OX=9606 GN=PSMB4 PE=1 SV=4	1.974	Up	0.029299	PSMB4	29.204	0.87	0.548	0.689	1.23	0.655	1.838	0.868	2.719	1.148	1.306	cytoplasm,nucleus	GO:0044700 single organism signaling; GO:0065008 regulation of biological quality; GO:0032270 positive regulation of cellular protein metabolic process; GO:0002220 innate immune response activating cell surface receptor signaling pathway; GO:0007166 cell surface receptor signaling pathway; GO:0010608 posttranscriptional regulation of gene expression; GO:0051443 positive regulation of ubiquitin-pr…	GO:0044421 extracellular region part; GO:0031982 vesicle; GO:0005737 cytoplasm; GO:0032991 macromolecular complex; GO:0044424 intracellular part; GO:0005623 cell; GO:0044422 organelle part; GO:1905369 endopeptidase complex; GO:0031974 membrane-enclosed lumen; GO:0070062 extracellular exosome; GO:1902494 catalytic complex; GO:0005654 nucleoplasm; GO:0070013 intracellular organelle lumen; GO:000562…	GO:0004175 endopeptidase activity; GO:0097367 carbohydrate derivative binding; GO:0004298 threonine-type endopeptidase activity; GO:0008233 peptidase activity; GO:0070003 threonine-type peptidase activity; GO:0003824 catalytic activity; GO:0005488 binding; GO:0008289 lipid binding; GO:0001530 lipopolysaccharide binding; GO:0070011 peptidase activity, acting on L-amino acid peptides; GO:0016787 hy…	K02736	PSMB4; 20S proteasome subunit beta 7 [EC:3.4.25.1]	hsa03050 Proteasome	IPR029055;	Nucleophile aminohydrolases, N-terminal;
Q96CS7	Pleckstrin homology domain-containing family B member 2 OS=Homo sapiens OX=9606 GN=PLEKHB2 PE=1 SV=1	2.298	Up	0.041384	PLEKHB2	24.736				0.467	0.592				1.062	1.372	mitochondria	GO:0050794 regulation of cellular process; GO:0050789 regulation of biological process; GO:0050793 regulation of developmental process; GO:0045595 regulation of cell differentiation; GO:0065007 biological regulation;	GO:0010008 endosome membrane; GO:0097708 intracellular vesicle; GO:0043229 intracellular organelle; GO:0016020 membrane; GO:0098588 bounding membrane of organelle; GO:0031090 organelle membrane; GO:0031410 cytoplasmic vesicle; GO:0044446 intracellular organelle part; GO:0005737 cytoplasm; GO:0031982 vesicle; GO:0044433 cytoplasmic vesicle part; GO:0031224 intrinsic component of membrane; GO:00444…	GO:0005515 protein binding; GO:0005488 binding;	K23857			IPR011993; IPR001849;	PH domain-like; Pleckstrin homology domain;
P48147	Prolyl endopeptidase OS=Homo sapiens OX=9606 GN=PREP PE=1 SV=2	0.585	Down	0.00189545	PREP	80.699	1.378	1.911	1.737	1.176	1.785	0.732	0.914	0.892	0.99	1.146	cytoplasm	GO:0006508 proteolysis; GO:0008152 metabolic process; GO:0043170 macromolecule metabolic process; GO:0019538 protein metabolic process; GO:0044238 primary metabolic process; GO:0071704 organic substance metabolic process;	GO:0043226 organelle; GO:0043231 intracellular membrane-bounded organelle; GO:0043229 intracellular organelle; GO:0016020 membrane; GO:0005634 nucleus; GO:0044464 cell part; GO:0005622 intracellular; GO:0005737 cytoplasm; GO:0044424 intracellular part; GO:0005829 cytosol; GO:0043227 membrane-bounded organelle; GO:0005623 cell; GO:0044444 cytoplasmic part;	GO:0004252 serine-type endopeptidase activity; GO:0004175 endopeptidase activity; GO:0008238 exopeptidase activity; GO:0008233 peptidase activity; GO:0003824 catalytic activity; GO:0017171 serine hydrolase activity; GO:0005488 binding; GO:0008236 serine-type peptidase activity; GO:0070011 peptidase activity, acting on L-amino acid peptides; GO:0005515 protein binding; GO:0016787 hydrolase activit…	K01322	PREP; prolyl oligopeptidase [EC:3.4.21.26]	hsa04614 Renin-angiotensin system	IPR001375; IPR029058; IPR023302;	Peptidase S9, prolyl oligopeptidase, catalytic domain; Alpha/Beta hydrolase fold; Peptidase S9A, N-terminal domain;
Q16651	Prostasin OS=Homo sapiens OX=9606 GN=PRSS8 PE=1 SV=1	0.531	Down	0.04	PRSS8	36.431	1.995	1.118	1.839	1.916	2.971	1.715	0.481	0.928	1.444	0.655	extracellular	GO:0044707 single-multicellular organism process; GO:0002028 regulation of sodium ion transport; GO:0031424 keratinization; GO:0048869 cellular developmental process; GO:0044699 single-organism process; GO:0071704 organic substance metabolic process; GO:0009913 epidermal cell differentiation; GO:0008152 metabolic process; GO:0030154 cell differentiation; GO:0010765 positive regulation of sodium i…	GO:0016020 membrane; GO:0031226 intrinsic component of plasma membrane; GO:0005615 extracellular space; GO:0044421 extracellular region part; GO:0019898 extrinsic component of membrane; GO:0071944 cell periphery; GO:0031982 vesicle; GO:0031225 anchored component of membrane; GO:0019897 extrinsic component of plasma membrane; GO:0031224 intrinsic component of membrane; GO:0005623 cell; GO:0016021 …	GO:0004252 serine-type endopeptidase activity; GO:0004175 endopeptidase activity; GO:0008233 peptidase activity; GO:0016247 channel regulator activity; GO:0017171 serine hydrolase activity; GO:0003824 catalytic activity; GO:0005488 binding; GO:0008236 serine-type peptidase activity; GO:0070011 peptidase activity, acting on L-amino acid peptides; GO:0016787 hydrolase activity; GO:0005515 protein b…	K08664	PRSS8; prostasin [EC:3.4.21.-]		IPR009003; IPR001254;	Peptidase S1, PA clan; Serine proteases, trypsin domain;
Q9Y6D6	Brefeldin A-inhibited guanine nucleotide-exchange protein 1 OS=Homo sapiens OX=9606 GN=ARFGEF1 PE=1 SV=2	0.265	Down	0.0097619	ARFGEF1	208.76	1.426	5.675	1.575	4.804	1.932	1.829	0.759	0.438	0.587	0.478	cytoplasm	GO:0065008 regulation of biological quality; GO:0032270 positive regulation of cellular protein metabolic process; GO:0051896 regulation of protein kinase B signaling; GO:0009891 positive regulation of biosynthetic process; GO:0030832 regulation of actin filament length; GO:0015031 protein transport; GO:0032535 regulation of cellular component size; GO:0044093 positive regulation of molecular fun…	GO:0016020 membrane; GO:0031090 organelle membrane; GO:0005737 cytoplasm; GO:0032991 macromolecular complex; GO:0044424 intracellular part; GO:0005623 cell; GO:0044422 organelle part; GO:0043228 non-membrane-bounded organelle; GO:0031974 membrane-enclosed lumen; GO:0005654 nucleoplasm; GO:0070013 intracellular organelle lumen; GO:0005622 intracellular; GO:0044464 cell part; GO:0098791 Golgi subco…	GO:0051018 protein kinase A binding; GO:0008092 cytoskeletal protein binding; GO:0005086 ARF guanyl-nucleotide exchange factor activity; GO:0005085 guanyl-nucleotide exchange factor activity; GO:0034237 protein kinase A regulatory subunit binding; GO:0005488 binding; GO:0005515 protein binding; GO:0017022 myosin binding; GO:0098772 molecular function regulator;	K18442	ARFGEF, BIG; brefeldin A-inhibited guanine nucleotide-exchange protein	hsa04144 Endocytosis	IPR023394; IPR011989; IPR000904; IPR032691; IPR032629; IPR016024; IPR015403;	Sec7 domain, alpha orthogonal bundle; Armadillo-like helical; Sec7 domain; Guanine nucleotide exchange factor, N-terminal; Mon2, dimerisation and cyclophilin-binding domain; Armadillo-type fold; Sec7, C-terminal;
Q8IUC4	Rhophilin-2 OS=Homo sapiens OX=9606 GN=RHPN2 PE=1 SV=1	0.503	Down	0.0043247	RHPN2	76.992	1.61	1.308	1.864	1.509	2.716	1.264	0.751	1.091	0.735	0.688	nucleus	GO:0050794 regulation of cellular process; GO:0044700 single organism signaling; GO:0051716 cellular response to stimulus; GO:0007165 signal transduction; GO:0050789 regulation of biological process; GO:0007154 cell communication; GO:0044699 single-organism process; GO:0023052 signaling; GO:0050896 response to stimulus; GO:0009987 cellular process; GO:0065007 biological regulation;	GO:0044464 cell part; GO:0005622 intracellular; GO:0005737 cytoplasm; GO:0048471 perinuclear region of cytoplasm; GO:0044424 intracellular part; GO:0005829 cytosol; GO:0005623 cell; GO:0044444 cytoplasmic part;	GO:0005515 protein binding; GO:0005488 binding;				IPR004328; IPR001478;	BRO1 domain; PDZ domain;
Q9UHA4	Ragulator complex protein LAMTOR3 OS=Homo sapiens OX=9606 GN=LAMTOR3 PE=1 SV=1	0.45	Down	0.0035369	LAMTOR3	13.623	1.085	0.829	1.014			0.386	0.533	0.4			cytoplasm	GO:0044700 single organism signaling; GO:0032270 positive regulation of cellular protein metabolic process; GO:0045321 leukocyte activation; GO:0006914 autophagy; GO:0044237 cellular metabolic process; GO:0071900 regulation of protein serine/threonine kinase activity; GO:0008152 metabolic process; GO:0044093 positive regulation of molecular function; GO:0009719 response to endogenous stimulus; GO…	GO:0016020 membrane; GO:0044421 extracellular region part; GO:0031410 cytoplasmic vesicle; GO:0031090 organelle membrane; GO:0030054 cell junction; GO:0071944 cell periphery; GO:0098796 membrane protein complex; GO:0098857 membrane microdomain; GO:0071986 Ragulator complex; GO:0005737 cytoplasm; GO:0031982 vesicle; GO:0044433 cytoplasmic vesicle part; GO:0032991 macromolecular complex; GO:0044424…	GO:0019209 kinase activator activity; GO:0030234 enzyme regulator activity; GO:0005488 binding; GO:0005515 protein binding; GO:0019207 kinase regulator activity; GO:0098772 molecular function regulator; GO:0008047 enzyme activator activity;	K04370	LAMTOR3, MP1, MAP2K1IP1; ragulator complex protein LAMTOR3	hsa04010 MAPK signaling pathway; hsa04150 mTOR signaling pathway
Q12789	General transcription factor 3C polypeptide 1 OS=Homo sapiens OX=9606 GN=GTF3C1 PE=1 SV=4	0.134	Down	0.043263	GTF3C1	238.87	6.091	5.002	1.151			1.059	0.317	0.263			nucleus	GO:0050794 regulation of cellular process; GO:0006725 cellular aromatic compound metabolic process; GO:0060255 regulation of macromolecule metabolic process; GO:0097659 nucleic acid-templated transcription; GO:0006352 DNA-templated transcription, initiation; GO:0019219 regulation of nucleobase-containing compound metabolic process; GO:0009058 biosynthetic process; GO:0044237 cellular metabolic pr…	GO:0043229 intracellular organelle; GO:0016020 membrane; GO:0043232 intracellular non-membrane-bounded organelle; GO:0044446 intracellular organelle part; GO:0090576 RNA polymerase III transcription factor complex; GO:0032991 macromolecular complex; GO:0031981 nuclear lumen; GO:0044424 intracellular part; GO:0005730 nucleolus; GO:0044798 nuclear transcription factor complex; GO:0005667 transcript…	GO:0000182 rDNA binding; GO:0003677 DNA binding; GO:0001003 RNA polymerase III type 2 promoter sequence-specific DNA binding; GO:0080084 5S rDNA binding; GO:0000976 transcription regulatory region sequence-specific DNA binding; GO:0003690 double-stranded DNA binding; GO:1990837 sequence-specific double-stranded DNA binding; GO:0001016 RNA polymerase III regulatory region DNA binding; GO:0005515 p…	K15199	GTF3C1; general transcription factor 3C polypeptide 1
O00308	NEDD4-like E3 ubiquitin-protein ligase WWP2 OS=Homo sapiens OX=9606 GN=WWP2 PE=1 SV=2	0.452	Down	0.0037596	WWP2	98.911				1.829	2.002				0.881	0.849	mitochondria	GO:0044409 entry into host; GO:0065008 regulation of biological quality; GO:0097659 nucleic acid-templated transcription; GO:0009891 positive regulation of biosynthetic process; GO:0051865 protein autoubiquitination; GO:0044237 cellular metabolic process; GO:0008152 metabolic process; GO:0032879 regulation of localization; GO:0010558 negative regulation of macromolecule biosynthetic process; GO:0…	GO:0043229 intracellular organelle; GO:0016020 membrane; GO:0044421 extracellular region part; GO:0031982 vesicle; GO:0005737 cytoplasm; GO:0032991 macromolecular complex; GO:0044424 intracellular part; GO:1990234 transferase complex; GO:0005623 cell; GO:0005576 extracellular region; GO:0043231 intracellular membrane-bounded organelle; GO:0043226 organelle; GO:0070062 extracellular exosome; GO:19…	GO:0019787 ubiquitin-like protein transferase activity; GO:0001190 transcriptional activator activity, RNA polymerase II transcription factor binding; GO:0005515 protein binding; GO:0061659 ubiquitin-like protein ligase activity; GO:0061630 ubiquitin protein ligase activity; GO:0001076 transcription factor activity, RNA polymerase II transcription factor binding; GO:0003824 catalytic activity; GO…	K05630	WWP2, AIP2; atrophin-1 interacting protein 2 (WW domain containing E3 ubiquitin protein ligase 2) [EC:2.3.2.26]	hsa04120 Ubiquitin mediated proteolysis	IPR001202; IPR000569; IPR000008;	WW domain; HECT domain; C2 domain;
Q86V21	Acetoacetyl-CoA synthetase OS=Homo sapiens OX=9606 GN=AACS PE=1 SV=1	0.21	Down	0.0159589	AACS	75.143	1.889	6.145	2.943			0.946	0.653	0.709			cytoplasm	GO:0065008 regulation of biological quality; GO:0048732 gland development; GO:0042593 glucose homeostasis; GO:0050796 regulation of insulin secretion; GO:0044255 cellular lipid metabolic process; GO:0002793 positive regulation of peptide secretion; GO:0009749 response to glucose; GO:0044237 cellular metabolic process; GO:0009605 response to external stimulus; GO:0008152 metabolic process; GO:0032…	GO:0044464 cell part; GO:0005622 intracellular; GO:0005737 cytoplasm; GO:0044424 intracellular part; GO:0005623 cell; GO:0005829 cytosol; GO:0044444 cytoplasmic part;	GO:0030729 acetoacetate-CoA ligase activity; GO:0005524 ATP binding; GO:1901265 nucleoside phosphate binding; GO:0001882 nucleoside binding; GO:0043167 ion binding; GO:0016874 ligase activity; GO:0005515 protein binding; GO:0047760 butyrate-CoA ligase activity; GO:0016877 ligase activity, forming carbon-sulfur bonds; GO:0000166 nucleotide binding; GO:0097159 organic cyclic compound binding; GO:19…	K01907	AACS, acsA; acetoacetyl-CoA synthetase [EC:6.2.1.16]	hsa00280 Valine, leucine and isoleucine degradation; hsa00650 Butanoate metabolism; hsa01100 Metabolic pathways	IPR032387; IPR000873;	Acetyl-coenzyme A synthetase, N-terminal domain; AMP-dependent synthetase/ligase;
Q16719	Kynureninase OS=Homo sapiens OX=9606 GN=KYNU PE=1 SV=1	1.925	Up	0.0098354	KYNU	52.351	0.668	0.789	0.653	0.473	1.053	1.191	1.339	2.214	0.933	1.323	cytoplasm	GO:0051188 cofactor biosynthetic process; GO:1901606 alpha-amino acid catabolic process; GO:0019362 pyridine nucleotide metabolic process; GO:0016053 organic acid biosynthetic process; GO:0042182 ketone catabolic process; GO:0009117 nucleotide metabolic process; GO:0044699 single-organism process; GO:0009058 biosynthetic process; GO:0019363 pyridine nucleotide biosynthetic process; GO:0034516 res…	GO:0043226 organelle; GO:0043231 intracellular membrane-bounded organelle; GO:0043229 intracellular organelle; GO:0044464 cell part; GO:0005622 intracellular; GO:0005737 cytoplasm; GO:0044424 intracellular part; GO:0043227 membrane-bounded organelle; GO:0005623 cell; GO:0005829 cytosol; GO:0005739 mitochondrion; GO:0044444 cytoplasmic part;	GO:0016822 hydrolase activity, acting on acid carbon-carbon bonds; GO:0046983 protein dimerization activity; GO:0043167 ion binding; GO:0005515 protein binding; GO:0016787 hydrolase activity; GO:0048037 cofactor binding; GO:0030170 pyridoxal phosphate binding; GO:1901363 heterocyclic compound binding; GO:0097159 organic cyclic compound binding; GO:0030429 kynureninase activity; GO:0042802 identic…	K01556	KYNU, kynU; kynureninase [EC:3.7.1.3]	hsa00380 Tryptophan metabolism; hsa01100 Metabolic pathways	IPR015424; IPR000192; IPR015422; IPR015421;	Pyridoxal phosphate-dependent transferase; Aminotransferase class V domain; Pyridoxal phosphate-dependent transferase, major region, subdomain 2; Pyridoxal phosphate-dependent transferase, major region, subdomain 1;
P49840	Glycogen synthase kinase-3 alpha OS=Homo sapiens OX=9606 GN=GSK3A PE=1 SV=2	0.383	Down	0.0045419	GSK3A	50.98	2.177	2.148	3.254			0.86	1.155	0.89			nucleus	GO:0044700 single organism signaling; GO:0010941 regulation of cell death; GO:1903955 positive regulation of protein targeting to mitochondrion; GO:0032885 regulation of polysaccharide biosynthetic process; GO:0009891 positive regulation of biosynthetic process; GO:1901862 negative regulation of muscle tissue development; GO:0010821 regulation of mitochondrion organization; GO:0044237 cellular me…	GO:0043229 intracellular organelle; GO:0030877 beta-catenin destruction complex; GO:0005737 cytoplasm; GO:0032991 macromolecular complex; GO:0044424 intracellular part; GO:0005829 cytosol; GO:0005623 cell; GO:0005739 mitochondrion; GO:0045202 synapse; GO:0043231 intracellular membrane-bounded organelle; GO:0043226 organelle; GO:0098794 postsynapse; GO:0005622 intracellular; GO:0044464 cell part; …	GO:0051018 protein kinase A binding; GO:0050321 tau-protein kinase activity; GO:1901265 nucleoside phosphate binding; GO:0016773 phosphotransferase activity, alcohol group as acceptor; GO:0019901 protein kinase binding; GO:0005515 protein binding; GO:0004672 protein kinase activity; GO:0097159 organic cyclic compound binding; GO:1901363 heterocyclic compound binding; GO:0016301 kinase activity; G…	K08822	GSK3A; glycogen synthase kinase 3 alpha [EC:2.7.11.26]	hsa04062 Chemokine signaling pathway; hsa04728 Dopaminergic synapse; hsa04932 Non-alcoholic fatty liver disease (NAFLD); hsa05131 Shigellosis	IPR000719; IPR011009;	Protein kinase domain; Protein kinase-like domain;
P62987	Ubiquitin-60S ribosomal protein L40 OS=Homo sapiens OX=9606 GN=UBA52 PE=1 SV=2	0.575	Down	0.025179	UBA52	14.728	2.487	1.795	2.086	1.136	1.05	1.093	0.863	0.779	1.015	1.171	extracellular	GO:0044700 single organism signaling; GO:0036508 protein alpha-1,2-demannosylation; GO:0010608 posttranscriptional regulation of gene expression; GO:1901185 negative regulation of ERBB signaling pathway; GO:0051443 positive regulation of ubiquitin-protein transferase activity; GO:0010564 regulation of cell cycle process; GO:0044237 cellular metabolic process; GO:0044264 cellular polysaccharide me…	GO:0016020 membrane; GO:0019867 outer membrane; GO:0044421 extracellular region part; GO:0031090 organelle membrane; GO:0005737 cytoplasm; GO:0044433 cytoplasmic vesicle part; GO:0032991 macromolecular complex; GO:0005623 cell; GO:0044422 organelle part; GO:0043228 non-membrane-bounded organelle; GO:0005765 lysosomal membrane; GO:0070062 extracellular exosome; GO:0005654 nucleoplasm; GO:0005622 i…	GO:0005515 protein binding; GO:0003735 structural constituent of ribosome; GO:0005198 structural molecule activity; GO:0005488 binding;	K02927	RP-L40e, RPL40; large subunit ribosomal protein L40e	hsa03010 Ribosome	IPR029071; IPR000626;	Ubiquitin-related domain; Ubiquitin domain;
P08138	Tumor necrosis factor receptor superfamily member 16 OS=Homo sapiens OX=9606 GN=NGFR PE=1 SV=1	2.065	Up	0.037819	NGFR	45.183	0.398	0.489	0.676			0.739	1.335	1.154			extracellular	GO:0044700 single organism signaling; GO:0010941 regulation of cell death; GO:0042593 glucose homeostasis; GO:0009891 positive regulation of biosynthetic process; GO:0009607 response to biotic stimulus; GO:0010466 negative regulation of peptidase activity; GO:0008152 metabolic process; GO:0044093 positive regulation of molecular function; GO:1903587 regulation of blood vessel endothelial cell pro…	GO:0016020 membrane; GO:0031410 cytoplasmic vesicle; GO:0071944 cell periphery; GO:0005737 cytoplasm; GO:0031982 vesicle; GO:0031224 intrinsic component of membrane; GO:0044424 intracellular part; GO:0005887 integral component of plasma membrane; GO:0005623 cell; GO:0044422 organelle part; GO:0031974 membrane-enclosed lumen; GO:0005654 nucleoplasm; GO:0070013 intracellular organelle lumen; GO:000…	GO:0031267 small GTPase binding; GO:0038023 signaling receptor activity; GO:0031625 ubiquitin protein ligase binding; GO:0005035 death receptor activity; GO:0048406 nerve growth factor binding; GO:0019838 growth factor binding; GO:0015026 coreceptor activity; GO:0005515 protein binding; GO:0004888 transmembrane signaling receptor activity; GO:0005516 calmodulin binding; GO:0004871 signal transduc…	K02583	NGFR, CD271; nerve growth factor receptor (TNFR superfamily member 16)	hsa04010 MAPK signaling pathway; hsa04014 Ras signaling pathway; hsa04015 Rap1 signaling pathway; hsa04060 Cytokine-cytokine receptor interaction; hsa04151 PI3K-Akt signaling pathway; hsa04215 Apoptosis - multiple species; hsa04722 Neurotrophin signaling pathway; hsa05202 Transcriptional misregulation in cancer	IPR001368; IPR000488; IPR011029; IPR034046;	TNFR/NGFR cysteine-rich region; Death domain; Death-like domain; Tumor necrosis factor receptor 16, N-terminal;
Q9NP85	Podocin OS=Homo sapiens OX=9606 GN=NPHS2 PE=1 SV=1	0.382	Down	0.04662	NPHS2	42.2	1.107	0.851	0.99	2.665	3.979	1.398	0.758	0.434	0.544	0.526	nucleus	GO:0044707 single-multicellular organism process; GO:0016043 cellular component organization; GO:0048869 cellular developmental process; GO:0044699 single-organism process; GO:0072001 renal system development; GO:0048468 cell development; GO:0032835 glomerulus development; GO:0030154 cell differentiation; GO:0030036 actin cytoskeleton organization; GO:0072207 metanephric epithelium development; G…	GO:0016020 membrane; GO:0005783 endoplasmic reticulum; GO:0044421 extracellular region part; GO:0071944 cell periphery; GO:0098857 membrane microdomain; GO:0030054 cell junction; GO:0036057 slit diaphragm; GO:0005737 cytoplasm; GO:0031982 vesicle; GO:0032991 macromolecular complex; GO:0031224 intrinsic component of membrane; GO:0044424 intracellular part; GO:0005887 integral component of plasma m…	GO:0005515 protein binding; GO:0005488 binding;	K18268	NPHS2; podocin		IPR001107;	Band 7 domain;
P13693	Translationally-controlled tumor protein OS=Homo sapiens OX=9606 GN=TPT1 PE=1 SV=1	0.037	Down	0.0023211	TPT1	19.595				2.74	3.634				0.111	0.128	cytoplasm,nucleus	GO:0065008 regulation of biological quality; GO:0010941 regulation of cell death; GO:0072503 cellular divalent inorganic cation homeostasis; GO:0009968 negative regulation of signal transduction; GO:0048869 cellular developmental process; GO:0023051 regulation of signaling; GO:0044699 single-organism process; GO:0044764 multi-organism cellular process; GO:0009607 response to biotic stimulus; GO:0…	GO:0097708 intracellular vesicle; GO:0043229 intracellular organelle; GO:0005615 extracellular space; GO:0044421 extracellular region part; GO:0005770 late endosome; GO:0031410 cytoplasmic vesicle; GO:0031982 vesicle; GO:0005737 cytoplasm; GO:0012505 endomembrane system; GO:0044424 intracellular part; GO:0005829 cytosol; GO:0005623 cell; GO:0005576 extracellular region; GO:0043231 intracellular m…	GO:0097159 organic cyclic compound binding; GO:1901363 heterocyclic compound binding; GO:0003723 RNA binding; GO:0008092 cytoskeletal protein binding; GO:0008017 microtubule binding; GO:0005488 binding; GO:0043167 ion binding; GO:0003676 nucleic acid binding; GO:0015631 tubulin binding; GO:0043169 cation binding; GO:0046872 metal ion binding; GO:0005515 protein binding; GO:0005509 calcium ion bin…				IPR011323; IPR011057;	Mss4/translationally controlled tumour-associated TCTP; Mss4-like;
Q15121	Astrocytic phosphoprotein PEA-15 OS=Homo sapiens OX=9606 GN=PEA15 PE=1 SV=2	0.081	Down	0.0085615	PEA15	15.04	2.935	1.152	3.557			0.321	0.216	0.084			cytoplasm	GO:0044700 single organism signaling; GO:0010941 regulation of cell death; GO:0032270 positive regulation of cellular protein metabolic process; GO:0044237 cellular metabolic process; GO:0071900 regulation of protein serine/threonine kinase activity; GO:0008152 metabolic process; GO:0032879 regulation of localization; GO:0044093 positive regulation of molecular function; GO:0014072 response to is…	GO:0043229 intracellular organelle; GO:0043232 intracellular non-membrane-bounded organelle; GO:0044430 cytoskeletal part; GO:0044446 intracellular organelle part; GO:0005737 cytoplasm; GO:0032991 macromolecular complex; GO:0044424 intracellular part; GO:0005875 microtubule associated complex; GO:0005829 cytosol; GO:0005623 cell; GO:0044422 organelle part; GO:0043228 non-membrane-bounded organell…	GO:0005515 protein binding; GO:0005488 binding;				IPR011029; IPR001875;	Death-like domain; Death effector domain;
Q9NRR6	Phosphatidylinositol polyphosphate 5-phosphatase type IV OS=Homo sapiens OX=9606 GN=INPP5E PE=1 SV=2	0.342	Down	0.0024171	INPP5E	70.205	3.046	2.582	2.078			1.042	0.709	0.886			nucleus	GO:0046486 glycerolipid metabolic process; GO:1901615 organic hydroxy compound metabolic process; GO:0046434 organophosphate catabolic process; GO:0006661 phosphatidylinositol biosynthetic process; GO:0006066 alcohol metabolic process; GO:0008654 phospholipid biosynthetic process; GO:0044699 single-organism process; GO:0009058 biosynthetic process; GO:0044255 cellular lipid metabolic process; GO:…	GO:0016020 membrane; GO:0031090 organelle membrane; GO:0071944 cell periphery; GO:0005737 cytoplasm; GO:0044424 intracellular part; GO:0005623 cell; GO:0044422 organelle part; GO:0043228 non-membrane-bounded organelle; GO:0005856 cytoskeleton; GO:0044441 ciliary part; GO:0005622 intracellular; GO:0044464 cell part; GO:0098791 Golgi subcompartment; GO:0044431 Golgi apparatus part; GO:0043227 membr…	GO:0052745 inositol phosphate phosphatase activity; GO:0004445 inositol-polyphosphate 5-phosphatase activity; GO:0042578 phosphoric ester hydrolase activity; GO:0003824 catalytic activity; GO:0016791 phosphatase activity; GO:0046030 inositol trisphosphate phosphatase activity; GO:0016788 hydrolase activity, acting on ester bonds; GO:0052866 phosphatidylinositol phosphate phosphatase activity; GO:…	K20278	INPP5E; inositol polyphosphate 5-phosphatase INPP5E [EC:3.1.3.36]	hsa00562 Inositol phosphate metabolism; hsa01100 Metabolic pathways; hsa04070 Phosphatidylinositol signaling system	IPR000300; IPR005135;	Inositol polyphosphate-related phosphatase; Endonuclease/exonuclease/phosphatase;
Q99808	Equilibrative nucleoside transporter 1 OS=Homo sapiens OX=9606 GN=SLC29A1 PE=1 SV=3	1.823	Up	0.022577	SLC29A1	50.219	0.762	0.856	0.534	0.476	0.48	1.122	1.804	1.204	0.847	0.689	plasma membrane	GO:0044700 single organism signaling; GO:0071331 cellular response to hexose stimulus; GO:0065008 regulation of biological quality; GO:0009746 response to hexose; GO:0048732 gland development; GO:0015862 uridine transport; GO:0007166 cell surface receptor signaling pathway; GO:0042593 glucose homeostasis; GO:0044699 single-organism process; GO:0009749 response to glucose; GO:0044237 cellular meta…	GO:0016323 basolateral plasma membrane; GO:0016020 membrane; GO:0031226 intrinsic component of plasma membrane; GO:0016324 apical plasma membrane; GO:0071944 cell periphery; GO:0031224 intrinsic component of membrane; GO:0005887 integral component of plasma membrane; GO:0005623 cell; GO:0016021 integral component of membrane; GO:0045202 synapse; GO:0005886 plasma membrane; GO:0044459 plasma membr…	GO:1901505 carbohydrate derivative transporter activity; GO:0022892 substrate-specific transporter activity; GO:0005337 nucleoside transmembrane transporter activity; GO:0005215 transporter activity; GO:0022857 transmembrane transporter activity; GO:0022891 substrate-specific transmembrane transporter activity; GO:0015932 nucleobase-containing compound transmembrane transporter activity;	K15014	SLC29A1_2_3, ENT1_2_3; solute carrier family 29 (equilibrative nucleoside transporter), member 1/2/3	hsa05034 Alcoholism	IPR020846;	Major facilitator superfamily domain;
Q8NHG7	Small VCP/p97-interacting protein OS=Homo sapiens OX=9606 GN=SVIP PE=1 SV=1	0.627	Down	0.038925	SVIP	8.4426	2.589	1.066	1.218	1.2	1.297	0.924	0.786	0.866	0.912	1.132	mitochondria	GO:0045321 leukocyte activation; GO:0032270 positive regulation of cellular protein metabolic process; GO:0051129 negative regulation of cellular component organization; GO:0031331 positive regulation of cellular catabolic process; GO:1903061 positive regulation of protein lipidation; GO:0090317 negative regulation of intracellular protein transport; GO:0009891 positive regulation of biosynthetic…	GO:0005790 smooth endoplasmic reticulum; GO:0016020 membrane; GO:0042175 nuclear outer membrane-endoplasmic reticulum membrane network; GO:0044421 extracellular region part; GO:0005783 endoplasmic reticulum; GO:0031410 cytoplasmic vesicle; GO:0031090 organelle membrane; GO:0071944 cell periphery; GO:0031982 vesicle; GO:0005737 cytoplasm; GO:0044433 cytoplasmic vesicle part; GO:0031224 intrinsic c…	GO:0005515 protein binding; GO:0043621 protein self-association; GO:0051117 ATPase binding; GO:0005488 binding; GO:0019899 enzyme binding;	K14014	SVIP; small VCP/p97-interacting protein	hsa04141 Protein processing in endoplasmic reticulum
P60903	Protein S100-A10 OS=Homo sapiens OX=9606 GN=S100A10 PE=1 SV=2	4.027	Up	1.52904e-05	S100A10	11.203	0.296	0.385	0.297	0.271	0.301	1.337	0.844	1.804	1.232	1.025	cytoplasm	GO:0044085 cellular component biogenesis; GO:0010256 endomembrane system organization; GO:1903391 regulation of adherens junction organization; GO:0090109 regulation of cell-substrate junction assembly; GO:0044699 single-organism process; GO:0090002 establishment of protein localization to plasma membrane; GO:0051234 establishment of localization; GO:0051130 positive regulation of cellular compon…	GO:0016020 membrane; GO:0043229 intracellular organelle; GO:0044421 extracellular region part; GO:0005783 endoplasmic reticulum; GO:0019898 extrinsic component of membrane; GO:0071944 cell periphery; GO:0031982 vesicle; GO:0005737 cytoplasm; GO:0019897 extrinsic component of plasma membrane; GO:0012505 endomembrane system; GO:0044424 intracellular part; GO:0005623 cell; GO:0005576 extracellular r…	GO:0042802 identical protein binding; GO:0042803 protein homodimerization activity; GO:0005488 binding; GO:0043167 ion binding; GO:0046983 protein dimerization activity; GO:0043169 cation binding; GO:0044325 ion channel binding; GO:0046872 metal ion binding; GO:0005515 protein binding; GO:0005509 calcium ion binding;	K17274	S100A10; calpactin-1 light chain		IPR011992; IPR013787;	EF-hand domain pair; S100/CaBP-9k-type, calcium binding, subdomain;
P15531	Nucleoside diphosphate kinase A OS=Homo sapiens OX=9606 GN=NME1 PE=1 SV=1	2.075	Up	0.00038168	NME1	17.149	0.789	0.735	0.593	0.486	0.456	1.171	1.207	1.08	1.598	1.292	cytoplasm	GO:0010941 regulation of cell death; GO:0009116 nucleoside metabolic process; GO:0006165 nucleoside diphosphate phosphorylation; GO:0009147 pyrimidine nucleoside triphosphate metabolic process; GO:0046129 purine ribonucleoside biosynthetic process; GO:0009163 nucleoside biosynthetic process; GO:0044237 cellular metabolic process; GO:0008285 negative regulation of cell proliferation; GO:0046390 ri…	GO:0043229 intracellular organelle; GO:0031252 cell leading edge; GO:0016020 membrane; GO:0044421 extracellular region part; GO:0042995 cell projection; GO:0071944 cell periphery; GO:0032587 ruffle membrane; GO:0031982 vesicle; GO:0005737 cytoplasm; GO:0044424 intracellular part; GO:0005829 cytosol; GO:0044463 cell projection part; GO:0005623 cell; GO:0005576 extracellular region; GO:0005886 plas…	GO:1901265 nucleoside phosphate binding; GO:0019205 nucleobase-containing compound kinase activity; GO:0016787 hydrolase activity; GO:0005515 protein binding; GO:0016776 phosphotransferase activity, phosphate group as acceptor; GO:0097159 organic cyclic compound binding; GO:1901363 heterocyclic compound binding; GO:0042802 identical protein binding; GO:0016301 kinase activity; GO:0032553 ribonucl…	K00940	ndk, NME; nucleoside-diphosphate kinase [EC:2.7.4.6]	hsa00230 Purine metabolism; hsa00240 Pyrimidine metabolism; hsa00983 Drug metabolism - other enzymes; hsa01100 Metabolic pathways
Q9BSQ5	Cerebral cavernous malformations 2 protein OS=Homo sapiens OX=9606 GN=CCM2 PE=1 SV=1	0.524	Down	0.0191577	CCM2	48.836	1.166	1.497	1.413	1.544	3.393	0.993	0.972	1.155	0.855	0.747	nucleus	GO:0044700 single organism signaling; GO:0060837 blood vessel endothelial cell differentiation; GO:0007166 cell surface receptor signaling pathway; GO:0001568 blood vessel development; GO:0043009 chordate embryonic development; GO:0048869 cellular developmental process; GO:0045216 cell-cell junction organization; GO:0044699 single-organism process; GO:0003159 morphogenesis of an endothelium; GO:0…	GO:0043226 organelle; GO:0043231 intracellular membrane-bounded organelle; GO:0043229 intracellular organelle; GO:0044464 cell part; GO:0005622 intracellular; GO:0005737 cytoplasm; GO:0032991 macromolecular complex; GO:0044424 intracellular part; GO:0043234 protein complex; GO:0043227 membrane-bounded organelle; GO:0005623 cell; GO:0005739 mitochondrion; GO:0044444 cytoplasmic part;	GO:0005515 protein binding; GO:0005488 binding;				IPR032375; IPR011993; IPR006020;	Cerebral cavernous malformations 2, harmonin-homology domain; PH domain-like; PTB/PI domain;
Q6ZP29	Lysosomal amino acid transporter 1 homolog OS=Homo sapiens OX=9606 GN=SLC66A1 PE=1 SV=1	0.348	Down	0.0040381	SLC66A1	31.947	2.791	1.792	1.634			0.651	0.737	0.777			plasma membrane	GO:0080144 amino acid homeostasis; GO:0015819 lysine transport; GO:0065008 regulation of biological quality; GO:0034220 ion transmembrane transport; GO:0015807 L-amino acid transport; GO:1990822 basic amino acid transmembrane transport; GO:0044699 single-organism process; GO:1903401 L-lysine transmembrane transport; GO:0098656 anion transmembrane transport; GO:0051234 establishment of localizatio…	GO:0016020 membrane; GO:0043229 intracellular organelle; GO:0098588 bounding membrane of organelle; GO:0031090 organelle membrane; GO:0005737 cytoplasm; GO:0044446 intracellular organelle part; GO:0031224 intrinsic component of membrane; GO:0044424 intracellular part; GO:0005623 cell; GO:0016021 integral component of membrane; GO:0044422 organelle part; GO:0098852 lytic vacuole membrane; GO:00432…	GO:0005342 organic acid transmembrane transporter activity; GO:0015189 L-lysine transmembrane transporter activity; GO:0015174 basic amino acid transmembrane transporter activity; GO:0015075 ion transmembrane transporter activity; GO:0015179 L-amino acid transmembrane transporter activity; GO:0022892 substrate-specific transporter activity; GO:0015181 arginine transmembrane transporter activity; …	K23678
P52758	2-iminobutanoate/2-iminopropanoate deaminase OS=Homo sapiens OX=9606 GN=RIDA PE=1 SV=1	0.381	Down	0.037898	RIDA	14.494	4.245	1.165	1.526	2.183	2.183	1.457	0.358	0.341	1.975	0.17	mitochondria	GO:0010608 posttranscriptional regulation of gene expression; GO:0007420 brain development; GO:0030323 respiratory tube development; GO:0006449 regulation of translational termination; GO:0044699 single-organism process; GO:0044237 cellular metabolic process; GO:0008285 negative regulation of cell proliferation; GO:0008152 metabolic process; GO:0050678 regulation of epithelial cell proliferation;…	GO:0043229 intracellular organelle; GO:0044421 extracellular region part; GO:0005777 peroxisome; GO:0031982 vesicle; GO:0005737 cytoplasm; GO:0044424 intracellular part; GO:0005829 cytosol; GO:0005623 cell; GO:0005576 extracellular region; GO:0005739 mitochondrion; GO:0043231 intracellular membrane-bounded organelle; GO:0043226 organelle; GO:0070062 extracellular exosome; GO:0005634 nucleus; GO:0…	GO:0036041 long-chain fatty acid binding; GO:0046983 protein dimerization activity; GO:0004521 endoribonuclease activity; GO:0005515 protein binding; GO:0016787 hydrolase activity; GO:1904012 platinum binding; GO:1901363 heterocyclic compound binding; GO:0097159 organic cyclic compound binding; GO:0042802 identical protein binding; GO:0031406 carboxylic acid binding; GO:0003824 catalytic activity…	K09022	ridA, tdcF, RIDA; 2-iminobutanoate/2-iminopropanoate deaminase [EC:3.5.99.10]		IPR013813;	Endoribonuclease L-PSP/chorismate mutase-like;
P01859	Immunoglobulin heavy constant gamma 2 OS=Homo sapiens OX=9606 GN=IGHG2 PE=1 SV=2	3.219	Up	0.023358	IGHG2	35.9	0.634	0.277	0.693	0.918	0.345	2.4	0.829	3.644	0.697	1.66	mitochondria	GO:0044700 single organism signaling; GO:0002694 regulation of leukocyte activation; GO:0016064 immunoglobulin mediated immune response; GO:0007166 cell surface receptor signaling pathway; GO:0038094 Fc-gamma receptor signaling pathway; GO:0098542 defense response to other organism; GO:0044699 single-organism process; GO:0051249 regulation of lymphocyte activation; GO:0009607 response to biotic s…	GO:0016020 membrane; GO:0005615 extracellular space; GO:0044421 extracellular region part; GO:0009897 external side of plasma membrane; GO:0071944 cell periphery; GO:0042571 immunoglobulin complex, circulating; GO:0031982 vesicle; GO:0019814 immunoglobulin complex; GO:0032991 macromolecular complex; GO:0005623 cell; GO:0005576 extracellular region; GO:0005886 plasma membrane; GO:0070062 extracell…	GO:0004252 serine-type endopeptidase activity; GO:0004175 endopeptidase activity; GO:0008233 peptidase activity; GO:0005102 receptor binding; GO:0003824 catalytic activity; GO:0017171 serine hydrolase activity; GO:0005488 binding; GO:0008236 serine-type peptidase activity; GO:0070011 peptidase activity, acting on L-amino acid peptides; GO:0034987 immunoglobulin receptor binding; GO:0016787 hydrol…				IPR007110; IPR013783; IPR003597;	Immunoglobulin-like domain; Immunoglobulin-like fold; Immunoglobulin C1-set;
O43451	"Maltase-glucoamylase, intestinal OS=Homo sapiens OX=9606 GN=MGAM PE=1 SV=5"	1.877	Up	0.0096765	MGAM	209.85	0.844	0.75	0.894	0.649	0.597	1.82	1.876	1.002	1.454	0.855	Golgi apparatus	GO:0044707 single-multicellular organism process; GO:0005982 starch metabolic process; GO:0000023 maltose metabolic process; GO:0007586 digestion; GO:0045321 leukocyte activation; GO:0002283 neutrophil activation involved in immune response; GO:0002252 immune effector process; GO:0044275 cellular carbohydrate catabolic process; GO:0044042 glucan metabolic process; GO:0044699 single-organism proce…	GO:0016020 membrane; GO:0044421 extracellular region part; GO:0016324 apical plasma membrane; GO:0031090 organelle membrane; GO:0031410 cytoplasmic vesicle; GO:0071944 cell periphery; GO:0031982 vesicle; GO:0005737 cytoplasm; GO:0044433 cytoplasmic vesicle part; GO:0031224 intrinsic component of membrane; GO:0044424 intracellular part; GO:0005623 cell; GO:0044422 organelle part; GO:0070821 tertia…	GO:0016160 amylase activity; GO:0090599 alpha-glucosidase activity; GO:0004558 alpha-1,4-glucosidase activity; GO:0003824 catalytic activity; GO:0005488 binding; GO:0004339 glucan 1,4-alpha-glucosidase activity; GO:0016798 hydrolase activity, acting on glycosyl bonds; GO:0015926 glucosidase activity; GO:0030246 carbohydrate binding; GO:0004553 hydrolase activity, hydrolyzing O-glycosyl compounds;…	K12047	MGAM; maltase-glucoamylase [EC:3.2.1.20 3.2.1.3]	hsa00052 Galactose metabolism; hsa00500 Starch and sucrose metabolism; hsa01100 Metabolic pathways; hsa04973 Carbohydrate digestion and absorption	IPR011013; IPR031727; IPR000519; IPR017853;	Galactose mutarotase-like domain; Galactose mutarotase, N-terminal barrel; P-type trefoil domain; Glycoside hydrolase superfamily;
P14209	CD99 antigen OS=Homo sapiens OX=9606 GN=CD99 PE=1 SV=1	0.18	Down	0.029456	CD99	18.848	5.384	2.16	2.129			1.127	0.377	0.241			extracellular	GO:0007155 cell adhesion; GO:0022610 biological adhesion;	GO:0016020 membrane; GO:0031226 intrinsic component of plasma membrane; GO:0071944 cell periphery; GO:0030054 cell junction; GO:0005737 cytoplasm; GO:0070161 anchoring junction; GO:0031224 intrinsic component of membrane; GO:0044424 intracellular part; GO:0005887 integral component of plasma membrane; GO:0005623 cell; GO:0016021 integral component of membrane; GO:0005886 plasma membrane; GO:00059…		K06520	CD99, MIC2; CD99 antigen	hsa04514 Cell adhesion molecules (CAMs); hsa04670 Leukocyte transendothelial migration
P61020	Ras-related protein Rab-5B OS=Homo sapiens OX=9606 GN=RAB5B PE=1 SV=1	0.644	Down	0.016323	RAB5B	23.707	2.055	1.572	1.539	1.222	1.615	1.136	1.001	0.666	1.435	0.918	mitochondria	GO:0044700 single organism signaling; GO:0050794 regulation of cellular process; GO:0060627 regulation of vesicle-mediated transport; GO:0016043 cellular component organization; GO:0010256 endomembrane system organization; GO:0045321 leukocyte activation; GO:0002283 neutrophil activation involved in immune response; GO:0002252 immune effector process; GO:0044699 single-organism process; GO:005089…	GO:0016020 membrane; GO:0044421 extracellular region part; GO:0031090 organelle membrane; GO:0031410 cytoplasmic vesicle; GO:0071944 cell periphery; GO:0005737 cytoplasm; GO:0031982 vesicle; GO:0044433 cytoplasmic vesicle part; GO:0044424 intracellular part; GO:0005623 cell; GO:0044422 organelle part; GO:0005769 early endosome; GO:0048770 pigment granule; GO:0070062 extracellular exosome; GO:0005…	GO:1901265 nucleoside phosphate binding; GO:0030742 GTP-dependent protein binding; GO:0001882 nucleoside binding; GO:0043167 ion binding; GO:0016817 hydrolase activity, acting on acid anhydrides; GO:0016787 hydrolase activity; GO:0005515 protein binding; GO:0000166 nucleotide binding; GO:0017111 nucleoside-triphosphatase activity; GO:1901363 heterocyclic compound binding; GO:0097159 organic cycli…	K07888	RAB5B; Ras-related protein Rab-5B	hsa04014 Ras signaling pathway; hsa04144 Endocytosis; hsa04145 Phagosome; hsa04962 Vasopressin-regulated water reabsorption; hsa05146 Amoebiasis; hsa05152 Tuberculosis	IPR005225; IPR027417;	Small GTP-binding protein domain; P-loop containing nucleoside triphosphate hydrolase;
Q32P51	Heterogeneous nuclear ribonucleoprotein A1-like 2 OS=Homo sapiens OX=9606 GN=HNRNPA1L2 PE=2 SV=2	2.604	Up	0.0103597	HNRNPA1L2	34.225	0.595	0.962	0.592			2.328	1.445	1.824			nucleus	GO:0050658 RNA transport; GO:0006725 cellular aromatic compound metabolic process; GO:0051028 mRNA transport; GO:0044237 cellular metabolic process; GO:0051236 establishment of RNA localization; GO:0071704 organic substance metabolic process; GO:0051234 establishment of localization; GO:0008152 metabolic process; GO:0046483 heterocycle metabolic process; GO:0050657 nucleic acid transport; GO:0006…	GO:0043229 intracellular organelle; GO:0044446 intracellular organelle part; GO:0005737 cytoplasm; GO:0032991 macromolecular complex; GO:0044424 intracellular part; GO:0005681 spliceosomal complex; GO:0005623 cell; GO:0044422 organelle part; GO:0043231 intracellular membrane-bounded organelle; GO:0043226 organelle; GO:0005634 nucleus; GO:0005622 intracellular; GO:0044464 cell part; GO:1990904 rib…	GO:0097159 organic cyclic compound binding; GO:1901363 heterocyclic compound binding; GO:0003723 RNA binding; GO:1901265 nucleoside phosphate binding; GO:0005488 binding; GO:0003676 nucleic acid binding; GO:0000166 nucleotide binding; GO:0036094 small molecule binding;	K12741	HNRNPA1_3; heterogeneous nuclear ribonucleoprotein A1/A3	hsa03040 Spliceosome	IPR000504; IPR012677;	RNA recognition motif domain; Nucleotide-binding alpha-beta plait domain;
Q86VL8	Multidrug and toxin extrusion protein 2 OS=Homo sapiens OX=9606 GN=SLC47A2 PE=1 SV=1	0.241	Down	0.045122	SLC47A2	65.084	1.763	0.842	3.631			0.624	0.477	0.404			plasma membrane	GO:0006810 transport; GO:0042493 response to drug; GO:0055085 transmembrane transport; GO:0042221 response to chemical; GO:1902578 single-organism localization; GO:0044699 single-organism process; GO:0015893 drug transport; GO:0046618 drug export; GO:0050896 response to stimulus; GO:0051179 localization; GO:0006855 drug transmembrane transport; GO:0044765 single-organism transport; GO:0051234 est…	GO:0016020 membrane; GO:0044464 cell part; GO:0071944 cell periphery; GO:0044425 membrane part; GO:0031224 intrinsic component of membrane; GO:0005623 cell; GO:0016021 integral component of membrane; GO:0005886 plasma membrane;	GO:0015298 solute:cation antiporter activity; GO:0022804 active transmembrane transporter activity; GO:0015291 secondary active transmembrane transporter activity; GO:0015075 ion transmembrane transporter activity; GO:0015299 solute:proton antiporter activity; GO:0015238 drug transmembrane transporter activity; GO:0022892 substrate-specific transporter activity; GO:0015077 monovalent inorganic ca…	K03327	TC.MATE, SLC47A, norM, mdtK, dinF; multidrug resistance protein, MATE family
P00966	Argininosuccinate synthase OS=Homo sapiens OX=9606 GN=ASS1 PE=1 SV=2	1.505	Up	0.048996	ASS1	46.53	0.617	0.64	0.683	0.913	1.068	0.843	1.722	1.257	0.863	1.215	cytoplasm	GO:0045428 regulation of nitric oxide biosynthetic process; GO:0016053 organic acid biosynthetic process; GO:0009891 positive regulation of biosynthetic process; GO:0071499 cellular response to laminar fluid shear stress; GO:0044699 single-organism process; GO:0009058 biosynthetic process; GO:0044237 cellular metabolic process; GO:0009084 glutamine family amino acid biosynthetic process; GO:00719…	GO:0043229 intracellular organelle; GO:0044421 extracellular region part; GO:0031982 vesicle; GO:0005737 cytoplasm; GO:0044424 intracellular part; GO:0005623 cell; GO:0005829 cytosol; GO:0005576 extracellular region; GO:0005739 mitochondrion; GO:0043231 intracellular membrane-bounded organelle; GO:0043226 organelle; GO:0070062 extracellular exosome; GO:0043209 myelin sheath; GO:0005622 intracellu…	GO:0016597 amino acid binding; GO:0004055 argininosuccinate synthase activity; GO:1901265 nucleoside phosphate binding; GO:0016874 ligase activity; GO:0005515 protein binding; GO:1901363 heterocyclic compound binding; GO:0097159 organic cyclic compound binding; GO:0042802 identical protein binding; GO:0031406 carboxylic acid binding; GO:0003824 catalytic activity; GO:0032553 ribonucleotide bindin…	K01940	argG, ASS1; argininosuccinate synthase [EC:6.3.4.5]	hsa00220 Arginine biosynthesis; hsa00250 Alanine, aspartate and glutamate metabolism; hsa01100 Metabolic pathways; hsa01230 Biosynthesis of amino acids; hsa05418 Fluid shear stress and atherosclerosis	IPR014729; IPR024074;	Rossmann-like alpha/beta/alpha sandwich fold; Argininosuccinate synthetase, catalytic/multimerisation domain body;
Q9BU68	Proline-rich protein 15-like protein OS=Homo sapiens OX=9606 GN=PRR15L PE=3 SV=1	0.156	Down	0.0070409	PRR15L	11.705				2.744	2.458				0.466	0.347	nucleus
Q9NR20	Dual specificity tyrosine-phosphorylation-regulated kinase 4 OS=Homo sapiens OX=9606 GN=DYRK4 PE=1 SV=2	3.541	Up	0.0046036	DYRK4	59.608				0.462	0.432				1.458	1.708	nucleus	GO:0016310 phosphorylation; GO:0044267 cellular protein metabolic process; GO:0018212 peptidyl-tyrosine modification; GO:0044238 primary metabolic process; GO:0044237 cellular metabolic process; GO:0006796 phosphate-containing compound metabolic process; GO:0071704 organic substance metabolic process; GO:0018108 peptidyl-tyrosine phosphorylation; GO:0018193 peptidyl-amino acid modification; GO:00…	GO:0043231 intracellular membrane-bounded organelle; GO:0043226 organelle; GO:0043229 intracellular organelle; GO:0005634 nucleus; GO:0044464 cell part; GO:0005622 intracellular; GO:0005737 cytoplasm; GO:0044424 intracellular part; GO:0043227 membrane-bounded organelle; GO:0005623 cell;	GO:1901265 nucleoside phosphate binding; GO:0016773 phosphotransferase activity, alcohol group as acceptor; GO:0004713 protein tyrosine kinase activity; GO:0005515 protein binding; GO:0004672 protein kinase activity; GO:0097159 organic cyclic compound binding; GO:1901363 heterocyclic compound binding; GO:0016301 kinase activity; GO:0003824 catalytic activity; GO:0032553 ribonucleotide binding; GO…	K18669	DYRK2_3_4; dual specificity tyrosine-phosphorylation-regulated kinase 2/3/4 [EC:2.7.12.1]		IPR000719; IPR011009;	Protein kinase domain; Protein kinase-like domain;
P61006	Ras-related protein Rab-8A OS=Homo sapiens OX=9606 GN=RAB8A PE=1 SV=1	0.43	Down	0.04724	RAB8A	23.668	2.762	0.868	2.872	1.003	1.042	1.001	0.346	0.595	0.715	1.022	cytoplasm	GO:0044700 single organism signaling; GO:0044085 cellular component biogenesis; GO:0065008 regulation of biological quality; GO:0032989 cellular component morphogenesis; GO:0060271 cilium assembly; GO:0015031 protein transport; GO:0044782 cilium organization; GO:0032879 regulation of localization; GO:0009719 response to endogenous stimulus; GO:0009306 protein secretion; GO:0044770 cell cycle phas…	GO:0016020 membrane; GO:0030425 dendrite; GO:0044421 extracellular region part; GO:0044450 microtubule organizing center part; GO:0031090 organelle membrane; GO:0005737 cytoplasm; GO:0044433 cytoplasmic vesicle part; GO:0043025 neuronal cell body; GO:0032588 trans-Golgi network membrane; GO:0005623 cell; GO:0043197 dendritic spine; GO:0044422 organelle part; GO:0043228 non-membrane-bounded organe…	GO:1901265 nucleoside phosphate binding; GO:0019901 protein kinase binding; GO:0016817 hydrolase activity, acting on acid anhydrides; GO:0016787 hydrolase activity; GO:0005515 protein binding; GO:0031489 myosin V binding; GO:0017137 Rab GTPase binding; GO:1901363 heterocyclic compound binding; GO:0097159 organic cyclic compound binding; GO:0016462 pyrophosphatase activity; GO:0019003 GDP binding;…	K07901	RAB8A, MEL; Ras-related protein Rab-8A	hsa04140 Autophagy - animal; hsa04144 Endocytosis; hsa04152 AMPK signaling pathway; hsa04530 Tight junction; hsa04972 Pancreatic secretion	IPR005225; IPR027417;	Small GTP-binding protein domain; P-loop containing nucleoside triphosphate hydrolase;
O14495	Phospholipid phosphatase 3 OS=Homo sapiens OX=9606 GN=PLPP3 PE=1 SV=1	1.676	Up	0.036004	PLPP3	35.116	0.671	0.896	0.657	0.496	0.371	0.932	1.531	0.629	1.063	1.025	plasma membrane	GO:0044700 single organism signaling; GO:0065008 regulation of biological quality; GO:0030335 positive regulation of cell migration; GO:0032270 positive regulation of cellular protein metabolic process; GO:0007166 cell surface receptor signaling pathway; GO:0022414 reproductive process; GO:0008354 germ cell migration; GO:0044255 cellular lipid metabolic process; GO:0044237 cellular metabolic proc…	GO:0043229 intracellular organelle; GO:0016020 membrane; GO:0044421 extracellular region part; GO:0031226 intrinsic component of plasma membrane; GO:0030054 cell junction; GO:0071944 cell periphery; GO:0005737 cytoplasm; GO:0031982 vesicle; GO:0070161 anchoring junction; GO:0012505 endomembrane system; GO:0031224 intrinsic component of membrane; GO:0044424 intracellular part; GO:0005887 integral …	GO:0005102 receptor binding; GO:0016791 phosphatase activity; GO:0044877 macromolecular complex binding; GO:0042577 lipid phosphatase activity; GO:0005178 integrin binding; GO:0016787 hydrolase activity; GO:0005515 protein binding; GO:0004721 phosphoprotein phosphatase activity; GO:0050839 cell adhesion molecule binding; GO:0042578 phosphoric ester hydrolase activity; GO:0003824 catalytic activit…	K01080	PLPP1_2_3; phosphatidate phosphatase [EC:3.1.3.4]	hsa00561 Glycerolipid metabolism; hsa00564 Glycerophospholipid metabolism; hsa00565 Ether lipid metabolism; hsa00600 Sphingolipid metabolism; hsa01100 Metabolic pathways; hsa04072 Phospholipase D signaling pathway; hsa04666 Fc gamma R-mediated phagocytosis; hsa04975 Fat digestion and absorption; hsa05231 Choline metabolism in cancer	IPR000326;	Phosphatidic acid phosphatase type 2/haloperoxidase;
Q9UBR1	Beta-ureidopropionase OS=Homo sapiens OX=9606 GN=UPB1 PE=1 SV=1	0.441	Down	0.0402	UPB1	43.166	1.095	1.449	0.733			0.673	0.408	0.365			plasma membrane	GO:0046135 pyrimidine nucleoside catabolic process; GO:0009116 nucleoside metabolic process; GO:0016053 organic acid biosynthetic process; GO:0006725 cellular aromatic compound metabolic process; GO:0044699 single-organism process; GO:0009058 biosynthetic process; GO:1901566 organonitrogen compound biosynthetic process; GO:0044237 cellular metabolic process; GO:0071704 organic substance metabolic…	GO:0070062 extracellular exosome; GO:0043226 organelle; GO:0044421 extracellular region part; GO:0044464 cell part; GO:0005622 intracellular; GO:0005737 cytoplasm; GO:0031982 vesicle; GO:1903561 extracellular vesicle; GO:0044424 intracellular part; GO:0005829 cytosol; GO:0005623 cell; GO:0043227 membrane-bounded organelle; GO:0005576 extracellular region; GO:0043230 extracellular organelle; GO:00…	GO:0003824 catalytic activity; GO:0005488 binding; GO:0043167 ion binding; GO:0043169 cation binding; GO:0046872 metal ion binding; GO:0016787 hydrolase activity; GO:0016811 hydrolase activity, acting on carbon-nitrogen (but not peptide) bonds, in linear amides; GO:0003837 beta-ureidopropionase activity; GO:0016810 hydrolase activity, acting on carbon-nitrogen (but not peptide) bonds;	K01431	UPB1, pydC; beta-ureidopropionase [EC:3.5.1.6]	hsa00240 Pyrimidine metabolism; hsa00410 beta-Alanine metabolism; hsa00770 Pantothenate and CoA biosynthesis; hsa00983 Drug metabolism - other enzymes; hsa01100 Metabolic pathways	IPR003010;	Carbon-nitrogen hydrolase;
P60660	Myosin light polypeptide 6 OS=Homo sapiens OX=9606 GN=MYL6 PE=1 SV=2	0.443	Down	0.022255	MYL6	16.93	2.304	1.22	1.992	1.1	1.901	1.165	0.308	0.325	1.093	0.88	cytoplasm	GO:0032502 developmental process; GO:0014706 striated muscle tissue development; GO:0030048 actin filament-based movement; GO:0044707 single-multicellular organism process; GO:0030049 muscle filament sliding; GO:0070252 actin-mediated cell contraction; GO:0003012 muscle system process; GO:0009888 tissue development; GO:0003008 system process; GO:0033275 actin-myosin filament sliding; GO:0060537 m…	GO:0043229 intracellular organelle; GO:0016020 membrane; GO:0044421 extracellular region part; GO:0098862 cluster of actin-based cell projections; GO:0005903 brush border; GO:0043232 intracellular non-membrane-bounded organelle; GO:0044430 cytoskeletal part; GO:0044446 intracellular organelle part; GO:0005737 cytoplasm; GO:0031982 vesicle; GO:0032991 macromolecular complex; GO:0044424 intracellul…	GO:0003774 motor activity; GO:0043167 ion binding; GO:0016817 hydrolase activity, acting on acid anhydrides; GO:0005515 protein binding; GO:0016787 hydrolase activity; GO:0017111 nucleoside-triphosphatase activity; GO:0008307 structural constituent of muscle; GO:0016887 ATPase activity; GO:0016462 pyrophosphatase activity; GO:0003824 catalytic activity; GO:0005488 binding; GO:0042623 ATPase activ…	K12751	MYL6; myosin light chain 6	hsa04270 Vascular smooth muscle contraction; hsa04530 Tight junction; hsa04921 Oxytocin signaling pathway	IPR011992; IPR002048;	EF-hand domain pair; EF-hand domain;
Q9UH65	Switch-associated protein 70 OS=Homo sapiens OX=9606 GN=SWAP70 PE=1 SV=1	0.219	Down	0.0224	SWAP70	68.997				1.304	1.644				0.259	0.388	cytoplasm	GO:0044085 cellular component biogenesis; GO:0030335 positive regulation of cell migration; GO:0065008 regulation of biological quality; GO:0016064 immunoglobulin mediated immune response; GO:0045321 leukocyte activation; GO:0030832 regulation of actin filament length; GO:0044237 cellular metabolic process; GO:0030036 actin cytoskeleton organization; GO:0008152 metabolic process; GO:0032879 regul…	GO:0031252 cell leading edge; GO:0043229 intracellular organelle; GO:0016020 membrane; GO:0042995 cell projection; GO:0043232 intracellular non-membrane-bounded organelle; GO:0071944 cell periphery; GO:0005737 cytoplasm; GO:0044424 intracellular part; GO:0005623 cell; GO:0005886 plasma membrane; GO:0043228 non-membrane-bounded organelle; GO:0043226 organelle; GO:0005856 cytoskeleton; GO:0043231 i…	GO:0003677 DNA binding; GO:0005524 ATP binding; GO:1901265 nucleoside phosphate binding; GO:0001882 nucleoside binding; GO:0043167 ion binding; GO:0005515 protein binding; GO:0000166 nucleotide binding; GO:1901363 heterocyclic compound binding; GO:0097159 organic cyclic compound binding; GO:0050839 cell adhesion molecule binding; GO:0032549 ribonucleoside binding; GO:0097367 carbohydrate derivati…	K20072	SWAP70; switch-associated protein 70		IPR011993; IPR002048; IPR011992; IPR001849;	PH domain-like; EF-hand domain; EF-hand domain pair; Pleckstrin homology domain;
Q9BVM4	Gamma-glutamylaminecyclotransferase OS=Homo sapiens OX=9606 GN=GGACT PE=1 SV=2	1.576	Up	0.0149369	GGACT	17.328	0.701	0.88	0.813	0.702	0.627	0.794	1.703	1.257	1.094	1.019	mitochondria	GO:1901575 organic substance catabolic process; GO:0008152 metabolic process; GO:1901565 organonitrogen compound catabolic process; GO:0042219 cellular modified amino acid catabolic process; GO:0006807 nitrogen compound metabolic process; GO:0009056 catabolic process; GO:1901564 organonitrogen compound metabolic process; GO:0071704 organic substance metabolic process;	GO:0070062 extracellular exosome; GO:0043226 organelle; GO:0044421 extracellular region part; GO:0031982 vesicle; GO:1903561 extracellular vesicle; GO:0043227 membrane-bounded organelle; GO:0005576 extracellular region; GO:0043230 extracellular organelle;	GO:0003839 gamma-glutamylcyclotransferase activity; GO:0005515 protein binding; GO:0016746 transferase activity, transferring acyl groups; GO:0003824 catalytic activity; GO:0016740 transferase activity; GO:0005488 binding; GO:0016755 transferase activity, transferring amino-acyl groups;	K19761	GGACT; gamma-glutamylaminecyclotransferase [EC:2.3.2.-]		IPR013024; IPR009288;	Gamma-glutamyl cyclotransferase-like; Gamma-glutamylcyclotransferase, AIG2-like;
O00159	Unconventional myosin-Ic OS=Homo sapiens OX=9606 GN=MYO1C PE=1 SV=4	0.487	Down	0.0082046	MYO1C	121.68	1.186	1.807	2.23	0.955	2.417	0.982	0.815	0.931	0.705	0.751	cytoplasm	GO:0044700 single organism signaling; GO:0050658 RNA transport; GO:0065008 regulation of biological quality; GO:0030335 positive regulation of cell migration; GO:0007166 cell surface receptor signaling pathway; GO:1903533 regulation of protein targeting; GO:0030832 regulation of actin filament length; GO:0015031 protein transport; GO:0015931 nucleobase-containing compound transport; GO:0032879 re…	GO:0016020 membrane; GO:0044421 extracellular region part; GO:0098862 cluster of actin-based cell projections; GO:0098857 membrane microdomain; GO:0032587 ruffle membrane; GO:0005737 cytoplasm; GO:0032991 macromolecular complex; GO:0098858 actin-based cell projection; GO:0099080 supramolecular complex; GO:0005623 cell; GO:0044422 organelle part; GO:0043228 non-membrane-bounded organelle; GO:00700…	GO:0051015 actin filament binding; GO:1901265 nucleoside phosphate binding; GO:0003774 motor activity; GO:0005102 receptor binding; GO:0016817 hydrolase activity, acting on acid anhydrides; GO:0016787 hydrolase activity; GO:0005515 protein binding; GO:0017160 Ral GTPase binding; GO:0016887 ATPase activity; GO:1901363 heterocyclic compound binding; GO:0097159 organic cyclic compound binding; GO:00…	K10356	MYO1; myosin I	hsa05130 Pathogenic Escherichia coli infection	IPR010926; IPR027417; IPR001609;	Class I myosin tail homology domain; P-loop containing nucleoside triphosphate hydrolase; Myosin head, motor domain;
P04733	Metallothionein-1F OS=Homo sapiens OX=9606 GN=MT1F PE=1 SV=1	0.136	Down	0.00161794	MT1F	6.0863	8.483	1.151	2.157	3	1.904	0.38	0.948	0.366	0.29	0.283	extracellular	GO:0051716 cellular response to stimulus; GO:0045926 negative regulation of growth; GO:0040008 regulation of growth; GO:0048519 negative regulation of biological process; GO:0050896 response to stimulus; GO:0071276 cellular response to cadmium ion; GO:0010038 response to metal ion; GO:0050789 regulation of biological process; GO:0042221 response to chemical; GO:0071294 cellular response to zinc i…	GO:0043226 organelle; GO:0043231 intracellular membrane-bounded organelle; GO:0043229 intracellular organelle; GO:0005634 nucleus; GO:0044464 cell part; GO:0005622 intracellular; GO:0005737 cytoplasm; GO:0048471 perinuclear region of cytoplasm; GO:0044424 intracellular part; GO:0043227 membrane-bounded organelle; GO:0005623 cell; GO:0044444 cytoplasmic part;	GO:0046914 transition metal ion binding; GO:0005488 binding; GO:0043167 ion binding; GO:0043169 cation binding; GO:0046872 metal ion binding; GO:0005515 protein binding; GO:0008270 zinc ion binding;	K14739	MT1_2; metallothionein 1/2	hsa04978 Mineral absorption	IPR023587; IPR017854;	Metallothionein domain, vertebrate; Metallothionein domain;
P17050	Alpha-N-acetylgalactosaminidase OS=Homo sapiens OX=9606 GN=NAGA PE=1 SV=2	1.606	Up	0.00070205	NAGA	46.564	0.686	0.93	0.947	0.91	0.784	1.727	1.324	1.339	1.215	1.231	extracellular	GO:0016042 lipid catabolic process; GO:1903509 liposaccharide metabolic process; GO:0046466 membrane lipid catabolic process; GO:0019377 glycolipid catabolic process; GO:0006643 membrane lipid metabolic process; GO:0044712 single-organism catabolic process; GO:1901658 glycosyl compound catabolic process; GO:0006664 glycolipid metabolic process; GO:0044763 single-organism cellular process; GO:0016…	GO:0043229 intracellular organelle; GO:0044421 extracellular region part; GO:0005737 cytoplasm; GO:0031982 vesicle; GO:0044424 intracellular part; GO:0005623 cell; GO:0005576 extracellular region; GO:0043226 organelle; GO:0070062 extracellular exosome; GO:0043231 intracellular membrane-bounded organelle; GO:0005622 intracellular; GO:0044464 cell part; GO:0005764 lysosome; GO:1903561 extracellular…	GO:0042802 identical protein binding; GO:0015925 galactosidase activity; GO:0003824 catalytic activity; GO:0042803 protein homodimerization activity; GO:0005488 binding; GO:0016798 hydrolase activity, acting on glycosyl bonds; GO:0046983 protein dimerization activity; GO:0008456 alpha-N-acetylgalactosaminidase activity; GO:0004553 hydrolase activity, hydrolyzing O-glycosyl compounds; GO:0005515 p…	K01204	NAGA; alpha-N-acetylgalactosaminidase [EC:3.2.1.49]	hsa00603 Glycosphingolipid biosynthesis - globo and isoglobo series; hsa01100 Metabolic pathways; hsa04142 Lysosome	IPR013785; IPR013780; IPR017853;	Aldolase-type TIM barrel; Glycosyl hydrolase, all-beta; Glycoside hydrolase superfamily;
P00338	L-lactate dehydrogenase A chain OS=Homo sapiens OX=9606 GN=LDHA PE=1 SV=2	0.246	Down	0.0121588	LDHA	36.688	0.799	1.327	1.323	4.374	4.026	1.172	0.474	0.419	0.338	0.512	cytoplasm	GO:0048569 post-embryonic animal organ development; GO:0010941 regulation of cell death; GO:0009116 nucleoside metabolic process; GO:0006165 nucleoside diphosphate phosphorylation; GO:0019362 pyridine nucleotide metabolic process; GO:0006096 glycolytic process; GO:0007420 brain development; GO:0046683 response to organophosphorus; GO:0009185 ribonucleoside diphosphate metabolic process; GO:000974…	GO:0043229 intracellular organelle; GO:0016020 membrane; GO:0044421 extracellular region part; GO:0031982 vesicle; GO:0005737 cytoplasm; GO:0044424 intracellular part; GO:0005829 cytosol; GO:0005623 cell; GO:0005576 extracellular region; GO:0043231 intracellular membrane-bounded organelle; GO:0043226 organelle; GO:0070062 extracellular exosome; GO:0005634 nucleus; GO:0005622 intracellular; GO:004…	GO:1901265 nucleoside phosphate binding; GO:0005515 protein binding; GO:0000166 nucleotide binding; GO:0019900 kinase binding; GO:0048037 cofactor binding; GO:0016491 oxidoreductase activity; GO:0016614 oxidoreductase activity, acting on CH-OH group of donors; GO:1901363 heterocyclic compound binding; GO:0097159 organic cyclic compound binding; GO:0016616 oxidoreductase activity, acting on the CH…	K00016	LDH, ldh; L-lactate dehydrogenase [EC:1.1.1.27]	hsa00010 Glycolysis / Gluconeogenesis; hsa00270 Cysteine and methionine metabolism; hsa00620 Pyruvate metabolism; hsa00640 Propanoate metabolism; hsa01100 Metabolic pathways; hsa04066 HIF-1 signaling pathway; hsa04922 Glucagon signaling pathway; hsa05230 Central carbon metabolism in cancer	IPR022383; IPR016040; IPR001236; IPR015955;	Lactate/malate dehydrogenase, C-terminal; NAD(P)-binding domain; Lactate/malate dehydrogenase, N-terminal; Lactate dehydrogenase/glycoside hydrolase, family 4, C-terminal;
O75340	Programmed cell death protein 6 OS=Homo sapiens OX=9606 GN=PDCD6 PE=1 SV=1	0.297	Down	0.0055218	PDCD6	21.868	1.783	1.224	2.475			0.617	0.477	0.533			cytoplasm,nucleus	GO:0044700 single organism signaling; GO:0010941 regulation of cell death; GO:0030335 positive regulation of cell migration; GO:0032270 positive regulation of cellular protein metabolic process; GO:0051896 regulation of protein kinase B signaling; GO:0007166 cell surface receptor signaling pathway; GO:0015031 protein transport; GO:0010594 regulation of endothelial cell migration; GO:0008152 metab…	GO:0016020 membrane; GO:0042175 nuclear outer membrane-endoplasmic reticulum membrane network; GO:0044421 extracellular region part; GO:0005783 endoplasmic reticulum; GO:0031090 organelle membrane; GO:0031410 cytoplasmic vesicle; GO:0031982 vesicle; GO:0005737 cytoplasm; GO:0044424 intracellular part; GO:0005623 cell; GO:0044422 organelle part; GO:0070062 extracellular exosome; GO:0031965 nuclear…	GO:0004198 calcium-dependent cysteine-type endopeptidase activity; GO:0008233 peptidase activity; GO:0043167 ion binding; GO:0046983 protein dimerization activity; GO:0008234 cysteine-type peptidase activity; GO:0016787 hydrolase activity; GO:0005515 protein binding; GO:0048306 calcium-dependent protein binding; GO:0004175 endopeptidase activity; GO:0043495 protein anchor; GO:0042802 identical pr…				IPR011992; IPR002048;	EF-hand domain pair; EF-hand domain;
Q9H0T7	Ras-related protein Rab-17 OS=Homo sapiens OX=9606 GN=RAB17 PE=1 SV=2	1.896	Up	0.048556	RAB17	23.491	0.22	0.336	0.552	0.71	0.772	0.518	1.232	0.744	1.151	1.265	mitochondria	GO:0044700 single organism signaling; GO:0060627 regulation of vesicle-mediated transport; GO:0044085 cellular component biogenesis; GO:0002386 immune response in mucosal-associated lymphoid tissue; GO:0065008 regulation of biological quality; GO:0046847 filopodium assembly; GO:0060491 regulation of cell projection assembly; GO:0048869 cellular developmental process; GO:0022008 neurogenesis; GO:0…	GO:0016323 basolateral plasma membrane; GO:0016020 membrane; GO:0030425 dendrite; GO:0044421 extracellular region part; GO:0016324 apical plasma membrane; GO:0031410 cytoplasmic vesicle; GO:0031090 organelle membrane; GO:0071944 cell periphery; GO:0005737 cytoplasm; GO:0031982 vesicle; GO:0044433 cytoplasmic vesicle part; GO:0043025 neuronal cell body; GO:0044424 intracellular part; GO:0055038 re…	GO:1901265 nucleoside phosphate binding; GO:0001882 nucleoside binding; GO:0043167 ion binding; GO:0016817 hydrolase activity, acting on acid anhydrides; GO:0016787 hydrolase activity; GO:0005515 protein binding; GO:0000166 nucleotide binding; GO:0017111 nucleoside-triphosphatase activity; GO:0097159 organic cyclic compound binding; GO:1901363 heterocyclic compound binding; GO:0032549 ribonucleos…	K07909	RAB17; Ras-related protein Rab-17		IPR005225; IPR027417;	Small GTP-binding protein domain; P-loop containing nucleoside triphosphate hydrolase;
Q92845	Kinesin-associated protein 3 OS=Homo sapiens OX=9606 GN=KIFAP3 PE=1 SV=2	2.408	Up	0.0149998	KIFAP3	91.204				0.495	0.542				1.126	1.371	cytoplasm	GO:0044700 single organism signaling; GO:0098840 protein transport along microtubule; GO:0044085 cellular component biogenesis; GO:0010941 regulation of cell death; GO:0046586 regulation of calcium-dependent cell-cell adhesion; GO:0046587 positive regulation of calcium-dependent cell-cell adhesion; GO:0044699 single-organism process; GO:0060271 cilium assembly; GO:0015031 protein transport; GO:00…	GO:0016020 membrane; GO:0044421 extracellular region part; GO:0035869 ciliary transition zone; GO:0005737 cytoplasm; GO:0032991 macromolecular complex; GO:0005623 cell; GO:0044422 organelle part; GO:0043228 non-membrane-bounded organelle; GO:0000793 condensed chromosome; GO:0070062 extracellular exosome; GO:0016939 kinesin II complex; GO:0098590 plasma membrane region; GO:0005622 intracellular; G…	GO:0005515 protein binding; GO:0008092 cytoskeletal protein binding; GO:0019894 kinesin binding; GO:0005488 binding;				IPR011989; IPR016024;	Armadillo-like helical; Armadillo-type fold;
O15240	Neurosecretory protein VGF OS=Homo sapiens OX=9606 GN=VGF PE=1 SV=2	0.439	Down	0.0050989	VGF	67.257	1.821	1.339	1.645	1.871	0.883	1.122	0.7	0.609	0.481	0.405	extracellular	GO:0044700 single organism signaling; GO:0065008 regulation of biological quality; GO:0009914 hormone transport; GO:0022414 reproductive process; GO:0023051 regulation of signaling; GO:0042593 glucose homeostasis; GO:0098542 defense response to other organism; GO:0046683 response to organophosphorus; GO:0044699 single-organism process; GO:0046660 female sex differentiation; GO:0044237 cellular me…	GO:0097708 intracellular vesicle; GO:0043229 intracellular organelle; GO:0005615 extracellular space; GO:0044421 extracellular region part; GO:0031410 cytoplasmic vesicle; GO:0005737 cytoplasm; GO:0031982 vesicle; GO:0012505 endomembrane system; GO:0044424 intracellular part; GO:0005623 cell; GO:0005576 extracellular region; GO:0043226 organelle; GO:0043231 intracellular membrane-bounded organell…	GO:0008083 growth factor activity; GO:0005515 protein binding; GO:0005102 receptor binding; GO:0005184 neuropeptide hormone activity; GO:0005488 binding; GO:0005179 hormone activity;
P07602	Prosaposin OS=Homo sapiens OX=9606 GN=PSAP PE=1 SV=2	2.401	Up	0.00049652	PSAP	58.112	0.536	0.649	0.413	0.566	0.651	0.956	1.229	1.13	2.03	1.414	plasma membrane	GO:0044700 single organism signaling; GO:0010941 regulation of cell death; GO:0032270 positive regulation of cellular protein metabolic process; GO:0045321 leukocyte activation; GO:0048732 gland development; GO:0022414 reproductive process; GO:0044255 cellular lipid metabolic process; GO:0019216 regulation of lipid metabolic process; GO:0044237 cellular metabolic process; GO:0007193 adenylate cyc…	GO:0016020 membrane; GO:0005615 extracellular space; GO:0044421 extracellular region part; GO:0031090 organelle membrane; GO:0031410 cytoplasmic vesicle; GO:0071944 cell periphery; GO:0005737 cytoplasm; GO:0031982 vesicle; GO:0044433 cytoplasmic vesicle part; GO:0031224 intrinsic component of membrane; GO:0044424 intracellular part; GO:0005623 cell; GO:0044422 organelle part; GO:0005775 vacuolar …	GO:0030234 enzyme regulator activity; GO:0005102 receptor binding; GO:0005488 binding; GO:0008289 lipid binding; GO:0005515 protein binding; GO:0001664 G-protein coupled receptor binding; GO:0098772 molecular function regulator; GO:0008047 enzyme activator activity;	K12382	PSAP, SGP1; saposin	hsa04142 Lysosome	IPR008139; IPR011001; IPR007856; IPR008138; IPR003119;	Saposin B type domain; Saposin-like; Saposin-like type B, region 1; Saposin B type, region 2; Saposin A-type domain;
Q03591	Complement factor H-related protein 1 OS=Homo sapiens OX=9606 GN=CFHR1 PE=1 SV=2	2.275	Up	0.0035391	CFHR1	37.65	0.974	1.08	0.61	0.531	0.894	1.264	1.665	2.414	2.585	1.376	extracellular	GO:0002253 activation of immune response; GO:0002252 immune effector process; GO:0072376 protein activation cascade; GO:0006959 humoral immune response; GO:0002376 immune system process; GO:0044238 primary metabolic process; GO:0050896 response to stimulus; GO:0048518 positive regulation of biological process; GO:0050776 regulation of immune response; GO:0071704 organic substance metabolic proces…	GO:0070062 extracellular exosome; GO:0043226 organelle; GO:0072562 blood microparticle; GO:0005615 extracellular space; GO:0044421 extracellular region part; GO:0031982 vesicle; GO:1903561 extracellular vesicle; GO:0043227 membrane-bounded organelle; GO:0005576 extracellular region; GO:0043230 extracellular organelle;		K23815		hsa04610 Complement and coagulation cascades	IPR000436;	Sushi/SCR/CCP domain;
Q9H9S4	Calcium-binding protein 39-like OS=Homo sapiens OX=9606 GN=CAB39L PE=1 SV=3	1.734	Up	0.039796	CAB39L	39.087	0.601	1.295	0.795	0.713	1.335	2.499	1.6	1.646	1.549	0.923	cytoplasm	GO:0050794 regulation of cellular process; GO:0045786 negative regulation of cell cycle; GO:0050789 regulation of biological process; GO:0007050 cell cycle arrest; GO:0044763 single-organism cellular process; GO:0044699 single-organism process; GO:0022402 cell cycle process; GO:0048523 negative regulation of cellular process; GO:0048519 negative regulation of biological process; GO:0009987 cellul…	GO:0070062 extracellular exosome; GO:0043226 organelle; GO:0044421 extracellular region part; GO:0044464 cell part; GO:0005622 intracellular; GO:0005737 cytoplasm; GO:0031982 vesicle; GO:1903561 extracellular vesicle; GO:0044424 intracellular part; GO:0005623 cell; GO:0005829 cytosol; GO:0043227 membrane-bounded organelle; GO:0005576 extracellular region; GO:0043230 extracellular organelle; GO:00…	GO:0005515 protein binding; GO:0005488 binding;	K08272	CAB39, MO25; calcium binding protein 39	hsa04150 mTOR signaling pathway; hsa04152 AMPK signaling pathway	IPR011989; IPR016024;	Armadillo-like helical; Armadillo-type fold;
Q14847	LIM and SH3 domain protein 1 OS=Homo sapiens OX=9606 GN=LASP1 PE=1 SV=2	0.532	Down	0.0037377	LASP1	29.717	1.738	1.516	1.657	1.316	2.29	1.243	0.726	0.952	1.022	0.589	nucleus	GO:0050794 regulation of cellular process; GO:0034220 ion transmembrane transport; GO:0023051 regulation of signaling; GO:0048522 positive regulation of cellular process; GO:0048518 positive regulation of biological process; GO:0051234 establishment of localization; GO:0006810 transport; GO:0055085 transmembrane transport; GO:0010646 regulation of cell communication; GO:0050789 regulation of biol…	GO:0044421 extracellular region part; GO:0005938 cell cortex; GO:0030054 cell junction; GO:0071944 cell periphery; GO:0031982 vesicle; GO:0005737 cytoplasm; GO:0099568 cytoplasmic region; GO:0030863 cortical cytoskeleton; GO:0030864 cortical actin cytoskeleton; GO:0044424 intracellular part; GO:0005623 cell; GO:0044422 organelle part; GO:0043228 non-membrane-bounded organelle; GO:0070062 extracel…	GO:0051015 actin filament binding; GO:0030674 protein binding, bridging; GO:0015075 ion transmembrane transporter activity; GO:0043167 ion binding; GO:0044877 macromolecular complex binding; GO:0022892 substrate-specific transporter activity; GO:0005515 protein binding; GO:0008270 zinc ion binding; GO:0022891 substrate-specific transmembrane transporter activity; GO:0050839 cell adhesion molecule…				IPR001781; IPR001452;	Zinc finger, LIM-type; SH3 domain;
Q9Y4D1	Disheveled-associated activator of morphogenesis 1 OS=Homo sapiens OX=9606 GN=DAAM1 PE=1 SV=2	0.39	Down	0.026298	DAAM1	123.47	1.106	1.637	1.811	2.104	3.383	1.9	0.318	1.046	0.209	0.439	plasma membrane	GO:0050794 regulation of cellular process; GO:0044700 single organism signaling; GO:0090175 regulation of establishment of planar polarity; GO:0016043 cellular component organization; GO:0007166 cell surface receptor signaling pathway; GO:0044699 single-organism process; GO:0050896 response to stimulus; GO:0051239 regulation of multicellular organismal process; GO:0035567 non-canonical Wnt signal…	GO:0043229 intracellular organelle; GO:0005929 cilium; GO:0016020 membrane; GO:0042995 cell projection; GO:0043232 intracellular non-membrane-bounded organelle; GO:0071944 cell periphery; GO:0044430 cytoskeletal part; GO:0044446 intracellular organelle part; GO:0005737 cytoplasm; GO:0036064 ciliary basal body; GO:0097517 contractile actin filament bundle; GO:0044424 intracellular part; GO:0005829…	GO:0031267 small GTPase binding; GO:0017048 Rho GTPase binding; GO:0008092 cytoskeletal protein binding; GO:0042802 identical protein binding; GO:0017016 Ras GTPase binding; GO:0005488 binding; GO:0003779 actin binding; GO:0005515 protein binding; GO:0051020 GTPase binding; GO:0019899 enzyme binding;	K04512	DAAM; dishevelled associated activator of morphogenesis	hsa04310 Wnt signaling pathway	IPR010473; IPR014767; IPR010472; IPR014768; IPR011989; IPR015425; IPR016024;	Formin, GTPase-binding domain; Diaphanous autoregulatory (DAD) domain; Formin, FH3 domain; Rho GTPase-binding/formin homology 3 (GBD/FH3) domain; Armadillo-like helical; Formin, FH2 domain; Armadillo-type fold;
P14555	"Phospholipase A2, membrane associated OS=Homo sapiens OX=9606 GN=PLA2G2A PE=1 SV=2"	0.34	Down	0.034319	PLA2G2A	16.083				0.919	0.684				0.234	0.311	extracellular	GO:0010744 positive regulation of macrophage derived foam cell differentiation; GO:0032270 positive regulation of cellular protein metabolic process; GO:0098542 defense response to other organism; GO:0044255 cellular lipid metabolic process; GO:0031347 regulation of defense response; GO:0044237 cellular metabolic process; GO:0009607 response to biotic stimulus; GO:0008610 lipid biosynthetic proce…	GO:0016020 membrane; GO:0042175 nuclear outer membrane-endoplasmic reticulum membrane network; GO:0005615 extracellular space; GO:0044421 extracellular region part; GO:0005783 endoplasmic reticulum; GO:0031410 cytoplasmic vesicle; GO:0071944 cell periphery; GO:0031982 vesicle; GO:0005737 cytoplasm; GO:0044424 intracellular part; GO:0005623 cell; GO:0044422 organelle part; GO:0070062 extracellular…	GO:0052689 carboxylic ester hydrolase activity; GO:0043167 ion binding; GO:0016787 hydrolase activity; GO:0016298 lipase activity; GO:0047498 calcium-dependent phospholipase A2 activity; GO:0003824 catalytic activity; GO:0005488 binding; GO:0004623 phospholipase A2 activity; GO:0016788 hydrolase activity, acting on ester bonds; GO:0005543 phospholipid binding; GO:0004620 phospholipase activity; G…	K01047	PLA2G, SPLA2; secretory phospholipase A2 [EC:3.1.1.4]	hsa00564 Glycerophospholipid metabolism; hsa00565 Ether lipid metabolism; hsa00590 Arachidonic acid metabolism; hsa00591 Linoleic acid metabolism; hsa00592 alpha-Linolenic acid metabolism; hsa01100 Metabolic pathways; hsa04014 Ras signaling pathway; hsa04270 Vascular smooth muscle contraction; hsa04972 Pancreatic secretion; hsa04975 Fat digestion and absorption	IPR016090;	Phospholipase A2 domain;
P22105	Tenascin-X OS=Homo sapiens OX=9606 GN=TNXB PE=1 SV=5	0.495	Down	0.0127205	TNXB	458.38	1.693	2.893	1.864	1.666	1.176	1.736	0.729	0.723	0.76	0.647	extracellular	GO:0044085 cellular component biogenesis; GO:0044707 single-multicellular organism process; GO:0016043 cellular component organization; GO:0071822 protein complex subunit organization; GO:0030199 collagen fibril organization; GO:0048251 elastic fiber assembly; GO:0044236 multicellular organism metabolic process; GO:0044763 single-organism cellular process; GO:0044699 single-organism process; GO:0…	GO:0031012 extracellular matrix; GO:0070062 extracellular exosome; GO:0043226 organelle; GO:0005615 extracellular space; GO:0044421 extracellular region part; GO:0005622 intracellular; GO:0044464 cell part; GO:0031982 vesicle; GO:1903561 extracellular vesicle; GO:0005578 proteinaceous extracellular matrix; GO:0005623 cell; GO:0043227 membrane-bounded organelle; GO:0005576 extracellular region; GO…	GO:0050839 cell adhesion molecule binding; GO:0097367 carbohydrate derivative binding; GO:0005102 receptor binding; GO:0005488 binding; GO:0043167 ion binding; GO:0044877 macromolecular complex binding; GO:0043168 anion binding; GO:0005515 protein binding; GO:0005178 integrin binding; GO:0008201 heparin binding; GO:0005539 glycosaminoglycan binding; GO:1901681 sulfur compound binding; GO:0032403 …	K06252	TN; tenascin	hsa04151 PI3K-Akt signaling pathway; hsa04510 Focal adhesion; hsa04512 ECM-receptor interaction; hsa05165 Human papillomavirus infection; hsa05206 MicroRNAs in cancer	IPR002181; IPR013111; IPR013783; IPR000742; IPR003961; IPR014716; IPR014715;	Fibrinogen, alpha/beta/gamma chain, C-terminal globular domain; EGF-like domain, extracellular; Immunoglobulin-like fold; EGF-like domain; Fibronectin type III; Fibrinogen, alpha/beta/gamma chain, C-terminal globular, subdomain 1; Fibrinogen, alpha/beta/gamma chain, C-terminal globular, subdomain 2;
Q6NUT3	Major facilitator superfamily domain-containing protein 12 OS=Homo sapiens OX=9606 GN=MFSD12 PE=1 SV=2	4.548	Up	0.007917	MFSD12	52.075	0.149	0.234	0.278			0.702	1.512	0.792			plasma membrane	GO:0006810 transport; GO:0051179 localization; GO:0051234 establishment of localization;	GO:0043229 intracellular organelle; GO:0016020 membrane; GO:0098588 bounding membrane of organelle; GO:0031090 organelle membrane; GO:0005737 cytoplasm; GO:0044446 intracellular organelle part; GO:0031224 intrinsic component of membrane; GO:0044424 intracellular part; GO:0005623 cell; GO:0016021 integral component of membrane; GO:0044422 organelle part; GO:0098852 lytic vacuole membrane; GO:00432…					IPR020846;	Major facilitator superfamily domain;
Q8N0X7	Spartin OS=Homo sapiens OX=9606 GN=SPART PE=1 SV=1	1.784	Up	0.017576	SPART	72.832	0.694	0.827	0.489	0.592	0.409	1.094	1.606	0.728	0.778	1.166	nucleus	GO:0051093 negative regulation of developmental process; GO:0065008 regulation of biological quality; GO:0009968 negative regulation of signal transduction; GO:0048640 negative regulation of developmental growth; GO:0048869 cellular developmental process; GO:0051129 negative regulation of cellular component organization; GO:0023051 regulation of signaling; GO:0022008 neurogenesis; GO:0044699 sing…	GO:0016020 membrane; GO:0019867 outer membrane; GO:0031090 organelle membrane; GO:0071944 cell periphery; GO:0005737 cytoplasm; GO:0044424 intracellular part; GO:0005623 cell; GO:0044422 organelle part; GO:0043228 non-membrane-bounded organelle; GO:0031974 membrane-enclosed lumen; GO:0005740 mitochondrial envelope; GO:0005654 nucleoplasm; GO:0070013 intracellular organelle lumen; GO:0005622 intra…	GO:0005515 protein binding; GO:0031625 ubiquitin protein ligase binding; GO:0044389 ubiquitin-like protein ligase binding; GO:0005488 binding; GO:0019899 enzyme binding;	K19366	SPG20; spartin	hsa04144 Endocytosis	IPR007330; IPR009686;	MIT; Senescence/spartin-associated;
Q93091	Ribonuclease K6 OS=Homo sapiens OX=9606 GN=RNASE6 PE=1 SV=2	2.748	Up	0.0076798	RNASE6	17.196	0.287	0.497	0.497			1.279	0.954	1.287			extracellular	GO:0006725 cellular aromatic compound metabolic process; GO:0006959 humoral immune response; GO:0043207 response to external biotic stimulus; GO:0050896 response to stimulus; GO:0051707 response to other organism; GO:0044237 cellular metabolic process; GO:0009607 response to biotic stimulus; GO:0071704 organic substance metabolic process; GO:0009605 response to external stimulus; GO:0044270 cellu…	GO:0070062 extracellular exosome; GO:0043226 organelle; GO:0044421 extracellular region part; GO:0031982 vesicle; GO:1903561 extracellular vesicle; GO:0043227 membrane-bounded organelle; GO:0005576 extracellular region; GO:0043230 extracellular organelle;	GO:0097159 organic cyclic compound binding; GO:1901363 heterocyclic compound binding; GO:0003824 catalytic activity; GO:0005488 binding; GO:0003676 nucleic acid binding; GO:0004518 nuclease activity; GO:0016788 hydrolase activity, acting on ester bonds; GO:0016787 hydrolase activity; GO:0004540 ribonuclease activity; GO:0004519 endonuclease activity;	K01172	RNASE6_7_8; ribonuclease 6/7/8 [EC:3.1.27.-]		IPR023412;	Ribonuclease A-domain;
O43505	"Beta-1,4-glucuronyltransferase 1 OS=Homo sapiens OX=9606 GN=B4GAT1 PE=1 SV=1"	2.774	Up	0.041461	B4GAT1	47.119	0.82	0.579	0.401			1.035	1.416	2.542			extracellular	GO:0043413 macromolecule glycosylation; GO:0006024 glycosaminoglycan biosynthetic process; GO:0048869 cellular developmental process; GO:0048666 neuron development; GO:0032989 cellular component morphogenesis; GO:0022008 neurogenesis; GO:0044699 single-organism process; GO:0009058 biosynthetic process; GO:0044237 cellular metabolic process; GO:0044272 sulfur compound biosynthetic process; GO:0044…	GO:0016020 membrane; GO:0044421 extracellular region part; GO:0031090 organelle membrane; GO:0031982 vesicle; GO:0005737 cytoplasm; GO:0031224 intrinsic component of membrane; GO:0044424 intracellular part; GO:0030173 integral component of Golgi membrane; GO:0005623 cell; GO:0044422 organelle part; GO:0070062 extracellular exosome; GO:0031301 integral component of organelle membrane; GO:0044425 m…	GO:0008375 acetylglucosaminyltransferase activity; GO:0015020 glucuronosyltransferase activity; GO:0016758 transferase activity, transferring hexosyl groups; GO:0003824 catalytic activity; GO:0005488 binding; GO:0043167 ion binding; GO:0046872 metal ion binding; GO:0008194 UDP-glycosyltransferase activity; GO:0043169 cation binding; GO:0016757 transferase activity, transferring glycosyl groups; G…	K21032	B4GAT1; beta-1,4-glucuronyltransferase 1 [EC:2.4.1.-]	hsa00515 Mannose type O-glycan biosynthesis; hsa01100 Metabolic pathways
Q9UJU6	Drebrin-like protein OS=Homo sapiens OX=9606 GN=DBNL PE=1 SV=1	0.218	Down	0.00193532	DBNL	48.207	1.795	5.188	2.16	1.921	3.11	0.647	0.618	0.57	0.575	0.675	nucleus	GO:0044700 single organism signaling; GO:0044085 cellular component biogenesis; GO:0032872 regulation of stress-activated MAPK cascade; GO:0045321 leukocyte activation; GO:0032270 positive regulation of cellular protein metabolic process; GO:0032989 cellular component morphogenesis; GO:0043506 regulation of JUN kinase activity; GO:0044237 cellular metabolic process; GO:0071900 regulation of prote…	GO:0016020 membrane; GO:0030425 dendrite; GO:0044421 extracellular region part; GO:0031090 organelle membrane; GO:0099568 cytoplasmic region; GO:0005737 cytoplasm; GO:0044433 cytoplasmic vesicle part; GO:0032991 macromolecular complex; GO:0005623 cell; GO:1904813 ficolin-1-rich granule lumen; GO:0044422 organelle part; GO:0005769 early endosome; GO:0043228 non-membrane-bounded organelle; GO:00700…	GO:0051015 actin filament binding; GO:0050839 cell adhesion molecule binding; GO:0008092 cytoskeletal protein binding; GO:0030234 enzyme regulator activity; GO:0005488 binding; GO:0045296 cadherin binding; GO:0044877 macromolecular complex binding; GO:0003779 actin binding; GO:0019904 protein domain specific binding; GO:0008022 protein C-terminus binding; GO:0005515 protein binding; GO:0098772 mo…	K20520	DBNL, ABP1; drebrin-like protein		IPR001452; IPR029006; IPR002108;	SH3 domain; ADF-H/Gelsolin-like domain; Actin-depolymerising factor homology domain;
O96013	Serine/threonine-protein kinase PAK 4 OS=Homo sapiens OX=9606 GN=PAK4 PE=1 SV=1	0.286	Down	0.0080367	PAK4	64.071	2.486	2.348	6.686	3.679	1.633	1.789	0.723	0.343	0.946	1.015	nucleus	GO:0044700 single organism signaling; GO:0051674 localization of cell; GO:0048666 neuron development; GO:0048869 cellular developmental process; GO:0022008 neurogenesis; GO:0044699 single-organism process; GO:0044237 cellular metabolic process; GO:0006796 phosphate-containing compound metabolic process; GO:0022610 biological adhesion; GO:0007165 signal transduction; GO:0008152 metabolic process; …	GO:0043229 intracellular organelle; GO:0030054 cell junction; GO:0005737 cytoplasm; GO:0070161 anchoring junction; GO:0012505 endomembrane system; GO:0044424 intracellular part; GO:0005913 cell-cell adherens junction; GO:0005623 cell; GO:0005911 cell-cell junction; GO:0043226 organelle; GO:0043231 intracellular membrane-bounded organelle; GO:0005925 focal adhesion; GO:0005622 intracellular; GO:00…	GO:1901265 nucleoside phosphate binding; GO:0016773 phosphotransferase activity, alcohol group as acceptor; GO:0005515 protein binding; GO:0004672 protein kinase activity; GO:0004702 signal transducer, downstream of receptor, with serine/threonine kinase activity; GO:0004871 signal transducer activity; GO:0097159 organic cyclic compound binding; GO:1901363 heterocyclic compound binding; GO:009864…	K05734	PAK4; p21-activated kinase 4 [EC:2.7.11.1]	hsa04012 ErbB signaling pathway; hsa04014 Ras signaling pathway; hsa04360 Axon guidance; hsa04510 Focal adhesion; hsa04660 T cell receptor signaling pathway; hsa04810 Regulation of actin cytoskeleton; hsa05170 Human immunodeficiency virus 1 infection; hsa05206 MicroRNAs in cancer; hsa05211 Renal cell carcinoma	IPR000719; IPR033923; IPR000095; IPR011009;	Protein kinase domain; p21 activated kinase binding domain; CRIB domain; Protein kinase-like domain;
Q8IV45	UNC5C-like protein OS=Homo sapiens OX=9606 GN=UNC5CL PE=1 SV=2	0.185	Down	0.00127754	UNC5CL	57.818	2.329	2.919	1.873			0.369	0.596	0.355			extracellular	GO:0044700 single organism signaling; GO:0046330 positive regulation of JNK cascade; GO:0050794 regulation of cellular process; GO:0032872 regulation of stress-activated MAPK cascade; GO:0032270 positive regulation of cellular protein metabolic process; GO:0060255 regulation of macromolecule metabolic process; GO:0031399 regulation of protein modification process; GO:0023051 regulation of signali…	GO:0016020 membrane; GO:0044425 membrane part; GO:0044464 cell part; GO:0005622 intracellular; GO:0005737 cytoplasm; GO:0031224 intrinsic component of membrane; GO:0044424 intracellular part; GO:0005623 cell; GO:0016021 integral component of membrane;	GO:0005515 protein binding; GO:0008233 peptidase activity; GO:0016787 hydrolase activity; GO:0003824 catalytic activity; GO:0005488 binding;				IPR000488; IPR000906; IPR033772; IPR011029;	Death domain; ZU5 domain; UPA domain; Death-like domain;
P57739	Claudin-2 OS=Homo sapiens OX=9606 GN=CLDN2 PE=1 SV=1	2.754	Up	0.048424	CLDN2	24.548	0.69	0.73	0.314	0.481	0.347	0.552	1.552	0.693	3.334	0.925	plasma membrane	GO:0098609 cell-cell adhesion; GO:0016338 calcium-independent cell-cell adhesion via plasma membrane cell-adhesion molecules; GO:0022610 biological adhesion; GO:0007155 cell adhesion; GO:0098742 cell-cell adhesion via plasma-membrane adhesion molecules;	GO:0016020 membrane; GO:0044421 extracellular region part; GO:0071944 cell periphery; GO:0030054 cell junction; GO:0031982 vesicle; GO:0031224 intrinsic component of membrane; GO:0005623 cell; GO:0005911 cell-cell junction; GO:0016021 integral component of membrane; GO:0005923 bicellular tight junction; GO:0005576 extracellular region; GO:0043296 apical junction complex; GO:0005886 plasma membran…	GO:0005515 protein binding; GO:0042802 identical protein binding; GO:0005198 structural molecule activity; GO:0005488 binding;	K06087	CLDN; claudin	hsa04514 Cell adhesion molecules (CAMs); hsa04530 Tight junction; hsa04670 Leukocyte transendothelial migration; hsa05130 Pathogenic Escherichia coli infection; hsa05160 Hepatitis C
P50995	Annexin A11 OS=Homo sapiens OX=9606 GN=ANXA11 PE=1 SV=1	0.509	Down	0.003741	ANXA11	54.389	2.291	1.21	2.21	1.276	1.303	0.967	0.833	0.781	0.977	0.664	cytoplasm	GO:0016192 vesicle-mediated transport; GO:0044763 single-organism cellular process; GO:0044699 single-organism process; GO:0050896 response to stimulus; GO:0006897 endocytosis; GO:0010038 response to metal ion; GO:0051234 establishment of localization; GO:0006909 phagocytosis; GO:0006810 transport; GO:0042221 response to chemical; GO:1902578 single-organism localization; GO:0051592 response to ca…	GO:0016020 membrane; GO:0044421 extracellular region part; GO:0031410 cytoplasmic vesicle; GO:0005737 cytoplasm; GO:0031982 vesicle; GO:0044424 intracellular part; GO:0005623 cell; GO:0044422 organelle part; GO:0048770 pigment granule; GO:0043228 non-membrane-bounded organelle; GO:0031974 membrane-enclosed lumen; GO:0070062 extracellular exosome; GO:0005856 cytoskeleton; GO:0005654 nucleoplasm; G…	GO:0003723 RNA binding; GO:0005544 calcium-dependent phospholipid binding; GO:0044877 macromolecular complex binding; GO:0043167 ion binding; GO:0005515 protein binding; GO:0048306 calcium-dependent protein binding; GO:0003823 antigen binding; GO:1901363 heterocyclic compound binding; GO:0097159 organic cyclic compound binding; GO:0005488 binding; GO:0023023 MHC protein complex binding; GO:000554…	K17095	ANXA7_11; annexin A7/11
Q8NDC0	MAPK-interacting and spindle-stabilizing protein-like OS=Homo sapiens OX=9606 GN=MAPK1IP1L PE=1 SV=4	0.376	Down	0.0132221	MAPK1IP1L	24.269	2.684	1.912	1.636			0.533	0.973	0.838			nucleus			GO:0005515 protein binding; GO:0005488 binding;
P52907	F-actin-capping protein subunit alpha-1 OS=Homo sapiens OX=9606 GN=CAPZA1 PE=1 SV=3	0.503	Down	0.0187607	CAPZA1	32.922	1.482	3.249	1.271	3.051	2.628	1.512	1.337	1.035	1.127	0.866	cytoplasm	GO:0044085 cellular component biogenesis; GO:0050794 regulation of cellular process; GO:0030833 regulation of actin filament polymerization; GO:0016043 cellular component organization; GO:0044707 single-multicellular organism process; GO:0007596 blood coagulation; GO:0065008 regulation of biological quality; GO:0030835 negative regulation of actin filament depolymerization; GO:0032956 regulation …	GO:0043229 intracellular organelle; GO:0044421 extracellular region part; GO:0043232 intracellular non-membrane-bounded organelle; GO:0044430 cytoskeletal part; GO:0071203 WASH complex; GO:0031982 vesicle; GO:0044446 intracellular organelle part; GO:0005737 cytoplasm; GO:0008290 F-actin capping protein complex; GO:0032991 macromolecular complex; GO:0044424 intracellular part; GO:0005829 cytosol; …	GO:0003779 actin binding; GO:0050839 cell adhesion molecule binding; GO:0005515 protein binding; GO:0008092 cytoskeletal protein binding; GO:0005488 binding; GO:0045296 cadherin binding;	K10364	CAPZA; capping protein (actin filament) muscle Z-line, alpha	hsa04144 Endocytosis
Q9H1C7	Cysteine-rich and transmembrane domain-containing protein 1 OS=Homo sapiens OX=9606 GN=CYSTM1 PE=1 SV=1	1.732	Up	0.031485	CYSTM1	10.631	0.497	0.93	0.634	0.771	0.693	0.675	1.952	1.202	1.156	1.122	extracellular	GO:0045321 leukocyte activation; GO:0002283 neutrophil activation involved in immune response; GO:0002252 immune effector process; GO:0044699 single-organism process; GO:0050896 response to stimulus; GO:0051234 establishment of localization; GO:1902578 single-organism localization; GO:0002275 myeloid cell activation involved in immune response; GO:0036230 granulocyte activation; GO:0009987 cellul…	GO:0016020 membrane; GO:0044421 extracellular region part; GO:0031090 organelle membrane; GO:0031410 cytoplasmic vesicle; GO:0071944 cell periphery; GO:0005737 cytoplasm; GO:0031982 vesicle; GO:0044433 cytoplasmic vesicle part; GO:0031224 intrinsic component of membrane; GO:0044424 intracellular part; GO:0005623 cell; GO:0044422 organelle part; GO:0070821 tertiary granule membrane; GO:0070062 ext…					IPR028144;	Cysteine-rich transmembrane CYSTM domain;
O43653	Prostate stem cell antigen OS=Homo sapiens OX=9606 GN=PSCA PE=1 SV=2	0.162	Down	0.047438	PSCA	11.959	0.34	0.454	3.522	3.209	5.375	0.228	0.219	0.244	0.918	0.484	extracellular	GO:0043687 post-translational protein modification; GO:0006501 C-terminal protein lipidation; GO:0044267 cellular protein metabolic process; GO:0009058 biosynthetic process; GO:0018410 C-terminal protein amino acid modification; GO:0044238 primary metabolic process; GO:1901576 organic substance biosynthetic process; GO:0044237 cellular metabolic process; GO:0044249 cellular biosynthetic process; …	GO:0016020 membrane; GO:0044421 extracellular region part; GO:0071944 cell periphery; GO:0031225 anchored component of membrane; GO:0031982 vesicle; GO:0031224 intrinsic component of membrane; GO:0005623 cell; GO:0005576 extracellular region; GO:0005886 plasma membrane; GO:0043226 organelle; GO:0070062 extracellular exosome; GO:0044425 membrane part; GO:0044464 cell part; GO:1903561 extracellular…					IPR016054;	Ly-6 antigen/uPA receptor-like;
Q13510	Acid ceramidase OS=Homo sapiens OX=9606 GN=ASAH1 PE=1 SV=5	2.586	Up	0.0114606	ASAH1	44.659	0.469	0.633	0.346	0.622	0.705	0.948	1.229	0.725	2.862	1.411	extracellular	GO:1903509 liposaccharide metabolic process; GO:0045321 leukocyte activation; GO:0002283 neutrophil activation involved in immune response; GO:0002252 immune effector process; GO:0006643 membrane lipid metabolic process; GO:0006672 ceramide metabolic process; GO:0006687 glycosphingolipid metabolic process; GO:0044699 single-organism process; GO:0044255 cellular lipid metabolic process; GO:0050896…	GO:1904724 tertiary granule lumen; GO:0005615 extracellular space; GO:0044421 extracellular region part; GO:0031410 cytoplasmic vesicle; GO:0005737 cytoplasm; GO:0031982 vesicle; GO:0044433 cytoplasmic vesicle part; GO:0044424 intracellular part; GO:0005623 cell; GO:1904813 ficolin-1-rich granule lumen; GO:0044422 organelle part; GO:0005775 vacuolar lumen; GO:0101002 ficolin-1-rich granule; GO:00…	GO:0016787 hydrolase activity; GO:0016811 hydrolase activity, acting on carbon-nitrogen (but not peptide) bonds, in linear amides; GO:0017040 ceramidase activity; GO:0003824 catalytic activity; GO:0016810 hydrolase activity, acting on carbon-nitrogen (but not peptide) bonds;	K12348	ASAH1; acid ceramidase [EC:3.5.1.23]	hsa00600 Sphingolipid metabolism; hsa01100 Metabolic pathways; hsa04071 Sphingolipid signaling pathway; hsa04142 Lysosome	IPR029130; IPR029132;	Acid ceramidase, N-terminal; Choloylglycine hydrolase/NAAA C-terminal;
P48556	26S proteasome non-ATPase regulatory subunit 8 OS=Homo sapiens OX=9606 GN=PSMD8 PE=1 SV=2	1.791	Up	0.031416	PSMD8	39.611				0.519	0.544				1.049	0.855	mitochondria	GO:0044085 cellular component biogenesis; GO:0044700 single organism signaling; GO:1903955 positive regulation of protein targeting to mitochondrion; GO:0010608 posttranscriptional regulation of gene expression; GO:0051443 positive regulation of ubiquitin-protein transferase activity; GO:0031347 regulation of defense response; GO:0010564 regulation of cell cycle process; GO:0044237 cellular metab…	GO:0044421 extracellular region part; GO:0005838 proteasome regulatory particle; GO:0031982 vesicle; GO:0005737 cytoplasm; GO:0032991 macromolecular complex; GO:0044424 intracellular part; GO:0005623 cell; GO:0044422 organelle part; GO:1905369 endopeptidase complex; GO:0031974 membrane-enclosed lumen; GO:0070062 extracellular exosome; GO:0005654 nucleoplasm; GO:1902494 catalytic complex; GO:00700…		K03031	PSMD8, RPN12; 26S proteasome regulatory subunit N12	hsa03050 Proteasome; hsa05169 Epstein-Barr virus infection	IPR033464;	CSN8/PSMD8/EIF3K;
Q9UKS6	Protein kinase C and casein kinase substrate in neurons protein 3 OS=Homo sapiens OX=9606 GN=PACSIN3 PE=1 SV=2	0.629	Down	0.023441	PACSIN3	48.486	1.142	1.473	0.947	1.513	2.169	0.871	1.17	0.839	0.832	0.846	nucleus	GO:0050794 regulation of cellular process; GO:0060627 regulation of vesicle-mediated transport; GO:0016043 cellular component organization; GO:0010256 endomembrane system organization; GO:0032270 positive regulation of cellular protein metabolic process; GO:0060255 regulation of macromolecule metabolic process; GO:0031331 positive regulation of cellular catabolic process; GO:0051129 negative regu…	GO:0097708 intracellular vesicle; GO:0043229 intracellular organelle; GO:0016020 membrane; GO:0044421 extracellular region part; GO:0031410 cytoplasmic vesicle; GO:0071944 cell periphery; GO:0031982 vesicle; GO:0005737 cytoplasm; GO:0012505 endomembrane system; GO:0044424 intracellular part; GO:0005623 cell; GO:0005829 cytosol; GO:0005576 extracellular region; GO:0005886 plasma membrane; GO:00432…	GO:0019855 calcium channel inhibitor activity; GO:0008092 cytoskeletal protein binding; GO:0008200 ion channel inhibitor activity; GO:0016247 channel regulator activity; GO:0005488 binding; GO:0008289 lipid binding; GO:0099106 ion channel regulator activity; GO:0005515 protein binding; GO:0005246 calcium channel regulator activity; GO:0098772 molecular function regulator; GO:0016248 channel inhib…	K20123	PACSIN; protein kinase C and casein kinase substrate in neurons protein		IPR001452; IPR031160; IPR001060;	SH3 domain; F-BAR domain; FCH domain;
Q9UBV8	Peflin OS=Homo sapiens OX=9606 GN=PEF1 PE=1 SV=1	0.227	Down	0.00184128	PEF1	30.381	4.099	1.188	3.185	1.421	2.466	1.09	0.492	0.403	0.541	0.276	nucleus	GO:0008152 metabolic process; GO:0042221 response to chemical; GO:0051592 response to calcium ion; GO:0006508 proteolysis; GO:0043170 macromolecule metabolic process; GO:0019538 protein metabolic process; GO:0010035 response to inorganic substance; GO:0044238 primary metabolic process; GO:0050896 response to stimulus; GO:0010038 response to metal ion; GO:0071704 organic substance metabolic proces…	GO:0016020 membrane; GO:0070062 extracellular exosome; GO:0043226 organelle; GO:0044421 extracellular region part; GO:0044464 cell part; GO:0005622 intracellular; GO:0005737 cytoplasm; GO:0031982 vesicle; GO:1903561 extracellular vesicle; GO:0044424 intracellular part; GO:0005623 cell; GO:0043227 membrane-bounded organelle; GO:0005576 extracellular region; GO:0043230 extracellular organelle;	GO:0003723 RNA binding; GO:0004198 calcium-dependent cysteine-type endopeptidase activity; GO:0008233 peptidase activity; GO:0046982 protein heterodimerization activity; GO:0043167 ion binding; GO:0046983 protein dimerization activity; GO:0005515 protein binding; GO:0016787 hydrolase activity; GO:0008234 cysteine-type peptidase activity; GO:0004175 endopeptidase activity; GO:1901363 heterocyclic …				IPR011992; IPR002048;	EF-hand domain pair; EF-hand domain;
P21741	Midkine OS=Homo sapiens OX=9606 GN=MDK PE=1 SV=1	2.599	Up	0.00064431	MDK	15.585	0.52	0.968	0.941	0.459	0.956	2.188	1.687	2.314	2.238	1.563	extracellular	GO:0044700 single organism signaling; GO:0010941 regulation of cell death; GO:0048732 gland development; GO:0021766 hippocampus development; GO:0051674 localization of cell; GO:0007166 cell surface receptor signaling pathway; GO:0007420 brain development; GO:0048869 cellular developmental process; GO:0043523 regulation of neuron apoptotic process; GO:0009891 positive regulation of biosynthetic pr…	GO:0042995 cell projection; GO:0005622 intracellular; GO:0044464 cell part; GO:0005737 cytoplasm; GO:0044424 intracellular part; GO:0005623 cell; GO:0005576 extracellular region;	GO:0008083 growth factor activity; GO:0097367 carbohydrate derivative binding; GO:0005102 receptor binding; GO:0005488 binding; GO:0043167 ion binding; GO:0005515 protein binding; GO:0043168 anion binding; GO:0005539 glycosaminoglycan binding; GO:0008201 heparin binding; GO:1901681 sulfur compound binding;	K06828	MDK; midkine		IPR020089; IPR020090; IPR020091;	Pleiotrophin/Midkine, N-terminal domain; Pleiotrophin/Midkine, C-terminal domain; Pleiotrophin/Midkine disulphide-rich domain;
P09958	Furin OS=Homo sapiens OX=9606 GN=FURIN PE=1 SV=2	0.397	Down	0.044738	FURIN	86.677				0.869	1.209				0.459	0.365	plasma membrane	GO:0044700 single organism signaling; GO:0065008 regulation of biological quality; GO:0032270 positive regulation of cellular protein metabolic process; GO:0006518 peptide metabolic process; GO:0007166 cell surface receptor signaling pathway; GO:0031424 keratinization; GO:0016486 peptide hormone processing; GO:0044237 cellular metabolic process; GO:0042157 lipoprotein metabolic process; GO:000991…	GO:0016020 membrane; GO:0044421 extracellular region part; GO:0005783 endoplasmic reticulum; GO:0031090 organelle membrane; GO:0031410 cytoplasmic vesicle; GO:0071944 cell periphery; GO:0098857 membrane microdomain; GO:0031982 vesicle; GO:0005737 cytoplasm; GO:0031224 intrinsic component of membrane; GO:0044424 intracellular part; GO:0005623 cell; GO:0044422 organelle part; GO:0031974 membrane-en…	GO:0008233 peptidase activity; GO:0048406 nerve growth factor binding; GO:0019838 growth factor binding; GO:0043167 ion binding; GO:0061134 peptidase regulator activity; GO:0008236 serine-type peptidase activity; GO:0016787 hydrolase activity; GO:0005515 protein binding; GO:0033218 amide binding; GO:0004857 enzyme inhibitor activity; GO:0098772 molecular function regulator; GO:0004866 endopeptida…	K01349	FURIN, PCSK3; furin [EC:3.4.21.75]		IPR034182; IPR002884; IPR009020; IPR000209; IPR009030; IPR008979; IPR032815;	Kexin/furin catalytic domain; Proprotein convertase, P; Proteinase propeptide inhibitor; Peptidase S8/S53 domain; Growth factor receptor cysteine-rich domain; Galactose-binding domain-like; Peptidase S8, pro-domain;
P09211	Glutathione S-transferase P OS=Homo sapiens OX=9606 GN=GSTP1 PE=1 SV=2	2.777	Up	0.0088031	GSTP1	23.356	0.217	0.342	1.504	0.6	0.448	1.294	1.517	2.794	1.431	1.603	mitochondria	GO:0010941 regulation of cell death; GO:0032872 regulation of stress-activated MAPK cascade; GO:0032680 regulation of tumor necrosis factor production; GO:0071384 cellular response to corticosteroid stimulus; GO:0044255 cellular lipid metabolic process; GO:0031347 regulation of defense response; GO:0044237 cellular metabolic process; GO:0009607 response to biotic stimulus; GO:0048145 regulation o…	GO:0034774 secretory granule lumen; GO:0016020 membrane; GO:0005615 extracellular space; GO:0044421 extracellular region part; GO:0031410 cytoplasmic vesicle; GO:0071944 cell periphery; GO:0031982 vesicle; GO:0005737 cytoplasm; GO:0044433 cytoplasmic vesicle part; GO:0032991 macromolecular complex; GO:0044424 intracellular part; GO:0005623 cell; GO:1904813 ficolin-1-rich granule lumen; GO:0044422…	GO:0004602 glutathione peroxidase activity; GO:0043167 ion binding; GO:0019901 protein kinase binding; GO:0016209 antioxidant activity; GO:0005515 protein binding; GO:0033218 amide binding; GO:0043295 glutathione binding; GO:0019207 kinase regulator activity; GO:0008144 drug binding; GO:1900750 oligopeptide binding; GO:0098772 molecular function regulator; GO:0019900 kinase binding; GO:1901681 su…	K23790		hsa00480 Glutathione metabolism; hsa00980 Metabolism of xenobiotics by cytochrome P450; hsa00982 Drug metabolism - cytochrome P450; hsa00983 Drug metabolism - other enzymes; hsa01524 Platinum drug resistance; hsa05200 Pathways in cancer; hsa05204 Chemical carcinogenesis; hsa05215 Prostate cancer; hsa05225 Hepatocellular carcinoma; hsa05418 Fluid shear stress and atherosclerosis	IPR010987; IPR004046; IPR012336; IPR004045;	Glutathione S-transferase, C-terminal-like; Glutathione S-transferase, C-terminal; Thioredoxin-like fold; Glutathione S-transferase, N-terminal;
P43405	Tyrosine-protein kinase SYK OS=Homo sapiens OX=9606 GN=SYK PE=1 SV=1	2.519	Up	0.046536	SYK	72.065				0.586	0.39				1.297	1.162	cytoplasm	GO:0044700 single organism signaling; GO:0002694 regulation of leukocyte activation; GO:0032872 regulation of stress-activated MAPK cascade; GO:0002554 serotonin secretion by platelet; GO:0098542 defense response to other organism; GO:0009891 positive regulation of biosynthetic process; GO:0018212 peptidyl-tyrosine modification; GO:1902563 regulation of neutrophil activation; GO:0044255 cellular …	GO:0016020 membrane; GO:0031410 cytoplasmic vesicle; GO:0019898 extrinsic component of membrane; GO:0098796 membrane protein complex; GO:0071944 cell periphery; GO:0031982 vesicle; GO:0005737 cytoplasm; GO:0032991 macromolecular complex; GO:0019815 B cell receptor complex; GO:0044424 intracellular part; GO:0031234 extrinsic component of cytoplasmic side of plasma membrane; GO:0005623 cell; GO:000…	GO:1901265 nucleoside phosphate binding; GO:0016773 phosphotransferase activity, alcohol group as acceptor; GO:0005102 receptor binding; GO:0004716 signal transducer, downstream of receptor, with protein tyrosine kinase activity; GO:0019901 protein kinase binding; GO:0035325 Toll-like receptor binding; GO:0004713 protein tyrosine kinase activity; GO:0005515 protein binding; GO:0005178 integrin bi…	K05855	SYK; spleen tyrosine kinase [EC:2.7.10.2]	hsa04064 NF-kappa B signaling pathway; hsa04072 Phospholipase D signaling pathway; hsa04151 PI3K-Akt signaling pathway; hsa04380 Osteoclast differentiation; hsa04611 Platelet activation; hsa04625 C-type lectin receptor signaling pathway; hsa04650 Natural killer cell mediated cytotoxicity; hsa04662 B cell receptor signaling pathway; hsa04664 Fc epsilon RI signaling pathway; hsa04666 Fc gamma R-med…	IPR000980; IPR000719; IPR023420; IPR020635; IPR001245; IPR011009;	SH2 domain; Protein kinase domain; Tyrosine-protein kinase SYK/ZAP-70, inter-SH2 domain; Tyrosine-protein kinase, catalytic domain; Serine-threonine/tyrosine-protein kinase catalytic domain; Protein kinase-like domain;
O14494	Phospholipid phosphatase 1 OS=Homo sapiens OX=9606 GN=PLPP1 PE=1 SV=1	3.195	Up	0.0035595	PLPP1	32.156	0.689	0.624	0.378	0.355	0.28	1.355	2.806	0.77	1.46	1.041	plasma membrane	GO:0044700 single organism signaling; GO:0007205 protein kinase C-activating G-protein coupled receptor signaling pathway; GO:0051674 localization of cell; GO:0022414 reproductive process; GO:0006643 membrane lipid metabolic process; GO:0008354 germ cell migration; GO:0044699 single-organism process; GO:0009058 biosynthetic process; GO:0044255 cellular lipid metabolic process; GO:0019216 regulati…	GO:0016020 membrane; GO:0044421 extracellular region part; GO:0031226 intrinsic component of plasma membrane; GO:0071944 cell periphery; GO:0031982 vesicle; GO:0031224 intrinsic component of membrane; GO:0005887 integral component of plasma membrane; GO:0005623 cell; GO:0005576 extracellular region; GO:0016021 integral component of membrane; GO:0005886 plasma membrane; GO:0043226 organelle; GO:00…	GO:0042392 sphingosine-1-phosphate phosphatase activity; GO:0003824 catalytic activity; GO:0042578 phosphoric ester hydrolase activity; GO:0016791 phosphatase activity; GO:0016788 hydrolase activity, acting on ester bonds; GO:0042577 lipid phosphatase activity; GO:0016787 hydrolase activity; GO:0008195 phosphatidate phosphatase activity;	K01080	PLPP1_2_3; phosphatidate phosphatase [EC:3.1.3.4]	hsa00561 Glycerolipid metabolism; hsa00564 Glycerophospholipid metabolism; hsa00565 Ether lipid metabolism; hsa00600 Sphingolipid metabolism; hsa01100 Metabolic pathways; hsa04072 Phospholipase D signaling pathway; hsa04666 Fc gamma R-mediated phagocytosis; hsa04975 Fat digestion and absorption; hsa05231 Choline metabolism in cancer	IPR000326;	Phosphatidic acid phosphatase type 2/haloperoxidase;
O43747	AP-1 complex subunit gamma-1 OS=Homo sapiens OX=9606 GN=AP1G1 PE=1 SV=5	0.491	Down	0.0101595	AP1G1	91.35	2.472	2.207	2.393	1.503	1.045	1.238	0.708	0.809	0.743	1.23	mitochondria	GO:0060627 regulation of vesicle-mediated transport; GO:0002694 regulation of leukocyte activation; GO:0021700 developmental maturation; GO:0048869 cellular developmental process; GO:0044699 single-organism process; GO:0051046 regulation of secretion; GO:0051249 regulation of lymphocyte activation; GO:0031347 regulation of defense response; GO:0015031 protein transport; GO:0051234 establishment o…	GO:0016020 membrane; GO:0030119 AP-type membrane coat adaptor complex; GO:0031090 organelle membrane; GO:0045334 clathrin-coated endocytic vesicle; GO:0031410 cytoplasmic vesicle; GO:0098796 membrane protein complex; GO:0031982 vesicle; GO:0005737 cytoplasm; GO:0030669 clathrin-coated endocytic vesicle membrane; GO:0044433 cytoplasmic vesicle part; GO:0032991 macromolecular complex; GO:0032588 tr…	GO:0031267 small GTPase binding; GO:0008092 cytoskeletal protein binding; GO:0008565 protein transporter activity; GO:0030742 GTP-dependent protein binding; GO:0019894 kinesin binding; GO:0017016 Ras GTPase binding; GO:0005488 binding; GO:0022892 substrate-specific transporter activity; GO:0005515 protein binding; GO:0051020 GTPase binding; GO:0019899 enzyme binding; GO:0017137 Rab GTPase binding…	K12391	AP1G1; AP-1 complex subunit gamma-1	hsa04142 Lysosome; hsa05170 Human immunodeficiency virus 1 infection	IPR008152; IPR011989; IPR008153; IPR016024; IPR013041; IPR002553;	Clathrin adaptor, alpha/beta/gamma-adaptin, appendage, Ig-like subdomain; Armadillo-like helical; Clathrin adaptor, gamma-adaptin, appendage; Armadillo-type fold; Coatomer/clathrin adaptor appendage, Ig-like subdomain; Clathrin/coatomer adaptor, adaptin-like, N-terminal;
P80294	Metallothionein-1H OS=Homo sapiens OX=9606 GN=MT1H PE=1 SV=1	0.399	Down	0.0115819	MT1H	6.0393	3.103	3.357	1.813	3.293	1.643	0.667	1.557	1.561	1.086	0.4	extracellular	GO:0051716 cellular response to stimulus; GO:0045926 negative regulation of growth; GO:0040008 regulation of growth; GO:0048519 negative regulation of biological process; GO:0050896 response to stimulus; GO:0071276 cellular response to cadmium ion; GO:0010038 response to metal ion; GO:0050789 regulation of biological process; GO:0042221 response to chemical; GO:0071294 cellular response to zinc i…	GO:0043226 organelle; GO:0043231 intracellular membrane-bounded organelle; GO:0043229 intracellular organelle; GO:0005634 nucleus; GO:0044464 cell part; GO:0005622 intracellular; GO:0005737 cytoplasm; GO:0048471 perinuclear region of cytoplasm; GO:0044424 intracellular part; GO:0043227 membrane-bounded organelle; GO:0005623 cell; GO:0044444 cytoplasmic part;	GO:0046914 transition metal ion binding; GO:0005488 binding; GO:0043167 ion binding; GO:0043169 cation binding; GO:0046872 metal ion binding; GO:0005515 protein binding; GO:0008270 zinc ion binding;	K14739	MT1_2; metallothionein 1/2	hsa04978 Mineral absorption	IPR023587; IPR017854;	Metallothionein domain, vertebrate; Metallothionein domain;
Q6UW60	Proprotein convertase subtilisin/kexin type 4 OS=Homo sapiens OX=9606 GN=PCSK4 PE=1 SV=2	6.804	Up	0.021677	PCSK4	82.794				0.297	0.193				1.981	1.353	extracellular	GO:0000003 reproduction; GO:0021700 developmental maturation; GO:0035036 sperm-egg recognition; GO:0022414 reproductive process; GO:0048869 cellular developmental process; GO:0009988 cell-cell recognition; GO:0044699 single-organism process; GO:0016485 protein processing; GO:0008037 cell recognition; GO:0048468 cell development; GO:0071704 organic substance metabolic process; GO:0030154 cell diff…	GO:0016020 membrane; GO:0031090 organelle membrane; GO:0031410 cytoplasmic vesicle; GO:0005737 cytoplasm; GO:0031982 vesicle; GO:0044433 cytoplasmic vesicle part; GO:0031224 intrinsic component of membrane; GO:0044424 intracellular part; GO:0005623 cell; GO:0044422 organelle part; GO:0005622 intracellular; GO:0044464 cell part; GO:0044425 membrane part; GO:0098805 whole membrane; GO:0099503 secre…	GO:0004252 serine-type endopeptidase activity; GO:0004175 endopeptidase activity; GO:0008233 peptidase activity; GO:0017171 serine hydrolase activity; GO:0003824 catalytic activity; GO:0005488 binding; GO:0008236 serine-type peptidase activity; GO:0070011 peptidase activity, acting on L-amino acid peptides; GO:0016787 hydrolase activity; GO:0005515 protein binding;	K08671	PCSK4; proprotein convertase subtilisin/kexin type 4 [EC:3.4.21.-]		IPR002884; IPR034182; IPR009020; IPR000209; IPR009030; IPR032815; IPR008979;	Proprotein convertase, P; Kexin/furin catalytic domain; Proteinase propeptide inhibitor; Peptidase S8/S53 domain; Growth factor receptor cysteine-rich domain; Peptidase S8, pro-domain; Galactose-binding domain-like;
Q8N9U0	Tandem C2 domains nuclear protein OS=Homo sapiens OX=9606 GN=TC2N PE=1 SV=2	0.343	Down	0.0116037	TC2N	55.284	0.823	1.791	1.195			0.388	0.447	0.472			nucleus	GO:0051640 organelle localization; GO:0044700 single organism signaling; GO:0046907 intracellular transport; GO:0001505 regulation of neurotransmitter levels; GO:0065008 regulation of biological quality; GO:0060255 regulation of macromolecule metabolic process; GO:0030193 regulation of blood coagulation; GO:0044699 single-organism process; GO:0007269 neurotransmitter secretion; GO:0099531 presyna…	GO:0016020 membrane; GO:0043229 intracellular organelle; GO:0071944 cell periphery; GO:0044424 intracellular part; GO:0005623 cell; GO:0005886 plasma membrane; GO:0045202 synapse; GO:0043231 intracellular membrane-bounded organelle; GO:0043226 organelle; GO:0005634 nucleus; GO:0005622 intracellular; GO:0044464 cell part; GO:0098793 presynapse; GO:0043227 membrane-bounded organelle; GO:0097458 neu…	GO:0005515 protein binding; GO:0005488 binding;	K17287	TC2N; tandem C2 domains nuclear protein		IPR000008;	C2 domain;
P01112	GTPase HRas OS=Homo sapiens OX=9606 GN=HRAS PE=1 SV=1	0.556	Down	0.028797	HRAS	21.298	1.823	1.093	1.394			0.713	0.942	0.741			cytoplasm	GO:0044085 cellular component biogenesis; GO:0044700 single organism signaling; GO:0010941 regulation of cell death; GO:0032872 regulation of stress-activated MAPK cascade; GO:0043523 regulation of neuron apoptotic process; GO:0098542 defense response to other organism; GO:0009891 positive regulation of biosynthetic process; GO:0031347 regulation of defense response; GO:0044237 cellular metabolic…	GO:0043229 intracellular organelle; GO:0016020 membrane; GO:0098588 bounding membrane of organelle; GO:0031090 organelle membrane; GO:0071944 cell periphery; GO:0044446 intracellular organelle part; GO:0005737 cytoplasm; GO:0000139 Golgi membrane; GO:0012505 endomembrane system; GO:0044424 intracellular part; GO:0005829 cytosol; GO:0005623 cell; GO:0044422 organelle part; GO:0005886 plasma membra…	GO:1901265 nucleoside phosphate binding; GO:0001882 nucleoside binding; GO:0043167 ion binding; GO:0016817 hydrolase activity, acting on acid anhydrides; GO:0005515 protein binding; GO:0016787 hydrolase activity; GO:0000166 nucleotide binding; GO:0017111 nucleoside-triphosphatase activity; GO:1901363 heterocyclic compound binding; GO:0097159 organic cyclic compound binding; GO:0032549 ribonucleos…	K02833	HRAS; GTPase HRas	hsa01521 EGFR tyrosine kinase inhibitor resistance; hsa01522 Endocrine resistance; hsa04010 MAPK signaling pathway; hsa04012 ErbB signaling pathway; hsa04014 Ras signaling pathway; hsa04015 Rap1 signaling pathway; hsa04062 Chemokine signaling pathway; hsa04068 FoxO signaling pathway; hsa04071 Sphingolipid signaling pathway; hsa04072 Phospholipase D signaling pathway; hsa04137 Mitophagy - animal; …	IPR005225; IPR027417;	Small GTP-binding protein domain; P-loop containing nucleoside triphosphate hydrolase;
Q9BYB0	SH3 and multiple ankyrin repeat domains protein 3 OS=Homo sapiens OX=9606 GN=SHANK3 PE=1 SV=3	0.219	Down	0.0025364	SHANK3	184.67	3.356	1.958	2.332			0.706	0.563	0.407			nucleus	GO:0044700 single organism signaling; GO:0044085 cellular component biogenesis; GO:2000273 positive regulation of receptor activity; GO:1900271 regulation of long-term synaptic potentiation; GO:0065008 regulation of biological quality; GO:0007420 brain development; GO:0060997 dendritic spine morphogenesis; GO:0032989 cellular component morphogenesis; GO:0044237 cellular metabolic process; GO:0050…	GO:0030425 dendrite; GO:0060170 ciliary membrane; GO:0016020 membrane; GO:0031090 organelle membrane; GO:0030054 cell junction; GO:0071944 cell periphery; GO:0005737 cytoplasm; GO:0044424 intracellular part; GO:0005623 cell; GO:0032279 asymmetric synapse; GO:0043197 dendritic spine; GO:0044422 organelle part; GO:0044309 neuron spine; GO:0098590 plasma membrane region; GO:0044441 ciliary part; GO:…	GO:0005102 receptor binding; GO:0043621 protein self-association; GO:0030160 GKAP/Homer scaffold activity; GO:0043167 ion binding; GO:0097110 scaffold protein binding; GO:0005515 protein binding; GO:0035255 ionotropic glutamate receptor binding; GO:0008270 zinc ion binding; GO:0017124 SH3 domain binding; GO:0032947 protein complex scaffold; GO:0035254 glutamate receptor binding; GO:0008092 cytosk…	K15009	SHANK; SH3 and multiple ankyrin repeat domains protein	hsa04724 Glutamatergic synapse	IPR011511; IPR001452; IPR013761; IPR020683; IPR001660; IPR001478; IPR032425;	Variant SH3 domain; SH3 domain; Sterile alpha motif/pointed domain; Ankyrin repeat-containing domain; Sterile alpha motif domain; PDZ domain; Talin, N-terminal F0 domain;
Q9NRV9	Heme-binding protein 1 OS=Homo sapiens OX=9606 GN=HEBP1 PE=1 SV=1	0.473	Down	0.0194838	HEBP1	21.097	0.919	2.36	1.209	1.954	2.297	0.626	0.839	1.088	1.123	0.461	cytoplasm	GO:0007623 circadian rhythm; GO:0048511 rhythmic process;	GO:0070062 extracellular exosome; GO:0043226 organelle; GO:0044421 extracellular region part; GO:0044464 cell part; GO:0005622 intracellular; GO:0005737 cytoplasm; GO:0031982 vesicle; GO:1903561 extracellular vesicle; GO:0044424 intracellular part; GO:0005623 cell; GO:0043227 membrane-bounded organelle; GO:0005576 extracellular region; GO:0043230 extracellular organelle;	GO:0097159 organic cyclic compound binding; GO:1901363 heterocyclic compound binding; GO:0020037 heme binding; GO:0046906 tetrapyrrole binding; GO:0005488 binding;				IPR011256;	Regulatory factor, effector binding domain;
P62873	Guanine nucleotide-binding protein G(I)/G(S)/G(T) subunit beta-1 OS=Homo sapiens OX=9606 GN=GNB1 PE=1 SV=3	0.565	Down	0.0053581	GNB1	37.377	0.982	1.559	1.354	1.368	1.811	0.666	0.584	0.823	0.774	1.15	cytoplasm	GO:0044085 cellular component biogenesis; GO:0044700 single organism signaling; GO:0065008 regulation of biological quality; GO:0007596 blood coagulation; GO:0007166 cell surface receptor signaling pathway; GO:0050877 neurological system process; GO:0009605 response to external stimulus; GO:0065003 macromolecular complex assembly; GO:0010658 striated muscle cell apoptotic process; GO:0051606 dete…	GO:0016020 membrane; GO:0030425 dendrite; GO:0044421 extracellular region part; GO:0019898 extrinsic component of membrane; GO:0031090 organelle membrane; GO:0005737 cytoplasm; GO:0032991 macromolecular complex; GO:0005623 cell; GO:0009898 cytoplasmic side of plasma membrane; GO:0044422 organelle part; GO:0005765 lysosomal membrane; GO:0070062 extracellular exosome; GO:0098590 plasma membrane reg…	GO:0005102 receptor binding; GO:0044877 macromolecular complex binding; GO:0016817 hydrolase activity, acting on acid anhydrides; GO:0005515 protein binding; GO:0016787 hydrolase activity; GO:0017111 nucleoside-triphosphatase activity; GO:0004871 signal transducer activity; GO:0030507 spectrin binding; GO:0008092 cytoskeletal protein binding; GO:0016462 pyrophosphatase activity; GO:0003824 cataly…	K04536	GNB1; guanine nucleotide-binding protein G(I)/G(S)/G(T) subunit beta-1	hsa04014 Ras signaling pathway; hsa04062 Chemokine signaling pathway; hsa04151 PI3K-Akt signaling pathway; hsa04371 Apelin signaling pathway; hsa04713 Circadian entrainment; hsa04723 Retrograde endocannabinoid signaling; hsa04724 Glutamatergic synapse; hsa04725 Cholinergic synapse; hsa04726 Serotonergic synapse; hsa04727 GABAergic synapse; hsa04728 Dopaminergic synapse; hsa04740 Olfactory transdu…	IPR017986; IPR015943; IPR001632;	WD40-repeat-containing domain; WD40/YVTN repeat-like-containing domain; G-protein, beta subunit;
Q9HBB8	Cadherin-related family member 5 OS=Homo sapiens OX=9606 GN=CDHR5 PE=1 SV=3	0.453	Down	0.0186566	CDHR5	88.222	2.092	1.496	1.841	1.227	2.167	1.87	0.574	0.28	0.808	0.461	extracellular	GO:0032502 developmental process; GO:0044085 cellular component biogenesis; GO:0050794 regulation of cellular process; GO:0032532 regulation of microvillus length; GO:0016043 cellular component organization; GO:0065008 regulation of biological quality; GO:1904970 brush border assembly; GO:0048869 cellular developmental process; GO:0098609 cell-cell adhesion; GO:0044763 single-organism cellular pr…	GO:0016020 membrane; GO:0044421 extracellular region part; GO:0098862 cluster of actin-based cell projections; GO:0005903 brush border; GO:0016324 apical plasma membrane; GO:0071944 cell periphery; GO:0031982 vesicle; GO:0031224 intrinsic component of membrane; GO:0005887 integral component of plasma membrane; GO:0098858 actin-based cell projection; GO:0005623 cell; GO:0070062 extracellular exoso…	GO:0050839 cell adhesion molecule binding; GO:0005488 binding; GO:0043167 ion binding; GO:0046872 metal ion binding; GO:0043169 cation binding; GO:0005515 protein binding; GO:0005509 calcium ion binding; GO:0008013 beta-catenin binding;	K16505	CDHR5, MUCDHL; cadherin-related family member 5		IPR015919; IPR002126;	Cadherin-like; Cadherin;
Q16348	Solute carrier family 15 member 2 OS=Homo sapiens OX=9606 GN=SLC15A2 PE=1 SV=2	0.551	Down	0.033098	SLC15A2	81.783	1.281	1.28	1.523	1.412	3.46	1.232	0.987	1.085	0.823	0.811	plasma membrane	GO:0044699 single-organism process; GO:0071702 organic substance transport; GO:0050896 response to stimulus; GO:0015031 protein transport; GO:0006818 hydrogen transport; GO:0015992 proton transport; GO:0051234 establishment of localization; GO:0006810 transport; GO:0045184 establishment of protein localization; GO:0042493 response to drug; GO:0055085 transmembrane transport; GO:0042221 response t…	GO:0016020 membrane; GO:0044421 extracellular region part; GO:0031226 intrinsic component of plasma membrane; GO:0071944 cell periphery; GO:0031982 vesicle; GO:0031224 intrinsic component of membrane; GO:0005887 integral component of plasma membrane; GO:0005623 cell; GO:0005576 extracellular region; GO:0016021 integral component of membrane; GO:0005886 plasma membrane; GO:0043226 organelle; GO:00…	GO:0015294 solute:cation symporter activity; GO:0022804 active transmembrane transporter activity; GO:0015291 secondary active transmembrane transporter activity; GO:0015075 ion transmembrane transporter activity; GO:0022897 proton-dependent peptide secondary active transmembrane transporter activity; GO:0015293 symporter activity; GO:0022892 substrate-specific transporter activity; GO:0005515 pr…	K14637	SLC15A2, PEPT2; solute carrier family 15 (oligopeptide transporter), member 2		IPR029028; IPR020846;	Alpha/beta knot methyltransferases; Major facilitator superfamily domain;
P01701	Immunoglobulin lambda variable 1-51 OS=Homo sapiens OX=9606 GN=IGLV1-51 PE=1 SV=2	5.405	Up	0.031561	IGLV1-51	12.249	0.514	0.51	0.505	0.375	0.49	7.849	0.761	1.804	1.397	1.129	extracellular	GO:0044700 single organism signaling; GO:0016064 immunoglobulin mediated immune response; GO:0051674 localization of cell; GO:0007166 cell surface receptor signaling pathway; GO:0038094 Fc-gamma receptor signaling pathway; GO:0044699 single-organism process; GO:0006909 phagocytosis; GO:0051234 establishment of localization; GO:0006956 complement activation; GO:0007165 signal transduction; GO:0008…	GO:0070062 extracellular exosome; GO:0043226 organelle; GO:0016020 membrane; GO:0044421 extracellular region part; GO:0044464 cell part; GO:0071944 cell periphery; GO:0031982 vesicle; GO:1903561 extracellular vesicle; GO:0043227 membrane-bounded organelle; GO:0005623 cell; GO:0005576 extracellular region; GO:0043230 extracellular organelle; GO:0005886 plasma membrane;	GO:0004252 serine-type endopeptidase activity; GO:0004175 endopeptidase activity; GO:0008233 peptidase activity; GO:0003824 catalytic activity; GO:0017171 serine hydrolase activity; GO:0005488 binding; GO:0008236 serine-type peptidase activity; GO:0070011 peptidase activity, acting on L-amino acid peptides; GO:0016787 hydrolase activity; GO:0005515 protein binding; GO:0003823 antigen binding;				IPR007110; IPR013783; IPR013106; IPR003599;	Immunoglobulin-like domain; Immunoglobulin-like fold; Immunoglobulin V-set domain; Immunoglobulin subtype;
P26012	Integrin beta-8 OS=Homo sapiens OX=9606 GN=ITGB8 PE=1 SV=1	1.802	Up	0.0093154	ITGB8	85.631	0.991	0.96	0.689			1.698	1.428	1.63			peroxisome	GO:0044700 single organism signaling; GO:0001568 blood vessel development; GO:0022414 reproductive process; GO:0007166 cell surface receptor signaling pathway; GO:0051216 cartilage development; GO:0006643 membrane lipid metabolic process; GO:0006672 ceramide metabolic process; GO:0044699 single-organism process; GO:0044255 cellular lipid metabolic process; GO:0044237 cellular metabolic process; G…	GO:0016020 membrane; GO:0044421 extracellular region part; GO:0098636 protein complex involved in cell adhesion; GO:0031226 intrinsic component of plasma membrane; GO:0071944 cell periphery; GO:0098796 membrane protein complex; GO:0031982 vesicle; GO:0098797 plasma membrane protein complex; GO:0098802 plasma membrane receptor complex; GO:0043235 receptor complex; GO:0032991 macromolecular complex…	GO:1990430 extracellular matrix protein binding; GO:0060089 molecular transducer activity; GO:0005515 protein binding; GO:0004872 receptor activity; GO:0005102 receptor binding; GO:0005488 binding;	K06591	ITGB8; integrin beta 8	hsa04151 PI3K-Akt signaling pathway; hsa04510 Focal adhesion; hsa04512 ECM-receptor interaction; hsa04514 Cell adhesion molecules (CAMs); hsa04810 Regulation of actin cytoskeleton; hsa05165 Human papillomavirus infection; hsa05410 Hypertrophic cardiomyopathy (HCM); hsa05412 Arrhythmogenic right ventricular cardiomyopathy (ARVC); hsa05414 Dilated cardiomyopathy (DCM)	IPR032695; IPR013111; IPR033760; IPR002369; IPR016201; IPR002035;	Integrin domain; EGF-like domain, extracellular; Integrin beta N-terminal; Integrin beta subunit, VWA domain; PSI domain; von Willebrand factor, type A;
Q9NPH2	Inositol-3-phosphate synthase 1 OS=Homo sapiens OX=9606 GN=ISYNA1 PE=1 SV=1	2.278	Up	0.023137	ISYNA1	61.067	0.701	0.431	0.628			1.419	0.929	1.662			nucleus	GO:0016051 carbohydrate biosynthetic process; GO:1901615 organic hydroxy compound metabolic process; GO:0006066 alcohol metabolic process; GO:0006020 inositol metabolic process; GO:0008654 phospholipid biosynthetic process; GO:0006021 inositol biosynthetic process; GO:0044699 single-organism process; GO:0044255 cellular lipid metabolic process; GO:0009058 biosynthetic process; GO:0044237 cellular…	GO:0044464 cell part; GO:0005622 intracellular; GO:0005737 cytoplasm; GO:0044424 intracellular part; GO:0005623 cell; GO:0005829 cytosol; GO:0044444 cytoplasmic part;	GO:0016872 intramolecular lyase activity; GO:0005515 protein binding; GO:0004512 inositol-3-phosphate synthase activity; GO:0016853 isomerase activity; GO:0003824 catalytic activity; GO:0005488 binding;	K01858	INO1, ISYNA1; myo-inositol-1-phosphate synthase [EC:5.5.1.4]	hsa00562 Inositol phosphate metabolism; hsa01100 Metabolic pathways	IPR013021; IPR016040;	Myo-inositol-1-phosphate synthase, GAPDH-like; NAD(P)-binding domain;
Q8WUM4	Membrane cofactor protein OS=Homo sapiens OX=9606 GN=CD46 PE=1 SV=3	2.83	Up	0.00068043	CD46	43.747	0.292	0.461	0.251	0.733	0.419	1.188	1.545	1.275	1.171	0.923	plasma membrane	GO:0044409 entry into host; GO:0002694 regulation of leukocyte activation; GO:0016064 immunoglobulin mediated immune response; GO:0032944 regulation of mononuclear cell proliferation; GO:0022414 reproductive process; GO:0002698 negative regulation of immune effector process; GO:1903318 negative regulation of protein maturation; GO:0045916 negative regulation of complement activation; GO:0031347 r…	GO:0016323 basolateral plasma membrane; GO:0016020 membrane; GO:0044421 extracellular region part; GO:0031090 organelle membrane; GO:0031410 cytoplasmic vesicle; GO:0030054 cell junction; GO:0071944 cell periphery; GO:0005737 cytoplasm; GO:0031982 vesicle; GO:0044433 cytoplasmic vesicle part; GO:0031224 intrinsic component of membrane; GO:0044424 intracellular part; GO:0005887 integral component …	GO:0008233 peptidase activity; GO:0016787 hydrolase activity; GO:0005515 protein binding; GO:0098772 molecular function regulator; GO:0004857 enzyme inhibitor activity; GO:0001618 virus receptor activity; GO:0004175 endopeptidase activity; GO:0050839 cell adhesion molecule binding; GO:0060089 molecular transducer activity; GO:0004872 receptor activity; GO:0030234 enzyme regulator activity; GO:000…	K04007	CD46, MCP; membrane cofactor protein	hsa04610 Complement and coagulation cascades; hsa05162 Measles	IPR000436;	Sushi/SCR/CCP domain;
Q96B97	SH3 domain-containing kinase-binding protein 1 OS=Homo sapiens OX=9606 GN=SH3KBP1 PE=1 SV=2	0.467	Down	0.033325	SH3KBP1	73.125	1.837	1.294	1.09			0.913	0.488	0.569			nucleus	GO:0044700 single organism signaling; GO:0050794 regulation of cellular process; GO:0016043 cellular component organization; GO:0016477 cell migration; GO:0065008 regulation of biological quality; GO:0009968 negative regulation of signal transduction; GO:0051674 localization of cell; GO:1901185 negative regulation of ERBB signaling pathway; GO:0023051 regulation of signaling; GO:0044699 single-or…	GO:0016020 membrane; GO:0031090 organelle membrane; GO:0031410 cytoplasmic vesicle; GO:0071944 cell periphery; GO:0030054 cell junction; GO:0005737 cytoplasm; GO:0031982 vesicle; GO:0044433 cytoplasmic vesicle part; GO:0044424 intracellular part; GO:0005911 cell-cell junction; GO:0005623 cell; GO:0044422 organelle part; GO:0043228 non-membrane-bounded organelle; GO:0005856 cytoskeleton; GO:000592…	GO:0019904 protein domain specific binding; GO:0005515 protein binding; GO:0017124 SH3 domain binding; GO:0005488 binding;	K12470	SH3KBP1, CIN85; SH3 domain-containing kinase-binding protein 1	hsa04144 Endocytosis	IPR001452;	SH3 domain;
Q9Y2H0	Disks large-associated protein 4 OS=Homo sapiens OX=9606 GN=DLGAP4 PE=1 SV=3	1.582	Up	0.020261	DLGAP4	108.01	0.829	0.836	0.764			1.536	1.279	1.028			nucleus	GO:0023052 signaling;	GO:0016020 membrane; GO:0005623 cell; GO:0044464 cell part; GO:0071944 cell periphery; GO:0005886 plasma membrane; GO:0045202 synapse;	GO:0005515 protein binding; GO:0005488 binding;
P54802	Alpha-N-acetylglucosaminidase OS=Homo sapiens OX=9606 GN=NAGLU PE=1 SV=2	2.399	Up	0.0095211	NAGLU	82.265	0.845	0.538	0.93	0.435	0.356	0.836	1.986	1.355	2.188	1.08	extracellular	GO:0060113 inner ear receptor cell differentiation; GO:0007420 brain development; GO:0006026 aminoglycan catabolic process; GO:0048666 neuron development; GO:0048869 cellular developmental process; GO:0044699 single-organism process; GO:0022008 neurogenesis; GO:0042474 middle ear morphogenesis; GO:0030203 glycosaminoglycan metabolic process; GO:0007622 rhythmic behavior; GO:0007610 behavior; GO:0…	GO:0043229 intracellular organelle; GO:0044421 extracellular region part; GO:0044446 intracellular organelle part; GO:0005737 cytoplasm; GO:0031982 vesicle; GO:0044424 intracellular part; GO:0005623 cell; GO:0043202 lysosomal lumen; GO:0005576 extracellular region; GO:0044422 organelle part; GO:0005775 vacuolar lumen; GO:0031974 membrane-enclosed lumen; GO:0043226 organelle; GO:0070062 extracellu…	GO:0004553 hydrolase activity, hydrolyzing O-glycosyl compounds; GO:0004561 alpha-N-acetylglucosaminidase activity; GO:0016787 hydrolase activity; GO:0003824 catalytic activity; GO:0016798 hydrolase activity, acting on glycosyl bonds; GO:0015929 hexosaminidase activity;	K01205	NAGLU; alpha-N-acetylglucosaminidase [EC:3.2.1.50]	hsa00531 Glycosaminoglycan degradation; hsa01100 Metabolic pathways; hsa04142 Lysosome	IPR024733; IPR024240; IPR024732; IPR017853;	Alpha-N-acetylglucosaminidase, tim-barrel domain; Alpha-N-acetylglucosaminidase, N-terminal; Alpha-N-acetylglucosaminidase, C-terminal; Glycoside hydrolase superfamily;
P20810	Calpastatin OS=Homo sapiens OX=9606 GN=CAST PE=1 SV=4	0.297	Down	0.041958	CAST	76.572	1.131	2.38	0.822	4.32	5.375	1.815	0.677	0.99	0.299	0.381	nucleus	GO:0050794 regulation of cellular process; GO:0010941 regulation of cell death; GO:0010951 negative regulation of endopeptidase activity; GO:0043069 negative regulation of programmed cell death; GO:0060255 regulation of macromolecule metabolic process; GO:0043067 regulation of programmed cell death; GO:0048523 negative regulation of cellular process; GO:0048519 negative regulation of biological p…	GO:0043226 organelle; GO:0043231 intracellular membrane-bounded organelle; GO:0043229 intracellular organelle; GO:0016020 membrane; GO:0005783 endoplasmic reticulum; GO:0044464 cell part; GO:0005622 intracellular; GO:0005737 cytoplasm; GO:0012505 endomembrane system; GO:0044424 intracellular part; GO:0005829 cytosol; GO:0043227 membrane-bounded organelle; GO:0005623 cell; GO:0044444 cytoplasmic p…	GO:0097159 organic cyclic compound binding; GO:1901363 heterocyclic compound binding; GO:0050839 cell adhesion molecule binding; GO:0003723 RNA binding; GO:0030234 enzyme regulator activity; GO:0005488 binding; GO:0030414 peptidase inhibitor activity; GO:0061134 peptidase regulator activity; GO:0045296 cadherin binding; GO:0003676 nucleic acid binding; GO:0061135 endopeptidase regulator activity;…	K04281	CAST; calpastatin	hsa05131 Shigellosis
P61225	Ras-related protein Rap-2b OS=Homo sapiens OX=9606 GN=RAP2B PE=1 SV=1	0.431	Down	0.039283	RAP2B	20.504	1.136	1.352	1.175	1.3	1.923	1.418	0.514	0.273	0.199	0.567	cytoplasm	GO:0044700 single organism signaling; GO:0065008 regulation of biological quality; GO:0007596 blood coagulation; GO:0045321 leukocyte activation; GO:0032270 positive regulation of cellular protein metabolic process; GO:0031954 positive regulation of protein autophosphorylation; GO:0044699 single-organism process; GO:0051234 establishment of localization; GO:0040013 negative regulation of locomoti…	GO:0016020 membrane; GO:0044421 extracellular region part; GO:0031410 cytoplasmic vesicle; GO:0031090 organelle membrane; GO:0098857 membrane microdomain; GO:0071944 cell periphery; GO:0044291 cell-cell contact zone; GO:0030054 cell junction; GO:0005737 cytoplasm; GO:0031982 vesicle; GO:0044433 cytoplasmic vesicle part; GO:0044424 intracellular part; GO:0055038 recycling endosome membrane; GO:000…	GO:1901265 nucleoside phosphate binding; GO:0001882 nucleoside binding; GO:0043167 ion binding; GO:0005515 protein binding; GO:0000166 nucleotide binding; GO:1901363 heterocyclic compound binding; GO:0097159 organic cyclic compound binding; GO:0032549 ribonucleoside binding; GO:0097367 carbohydrate derivative binding; GO:0019003 GDP binding; GO:0032553 ribonucleotide binding; GO:0005488 binding; …	K07838	RAP2B; Ras-related protein Rap-2B		IPR005225; IPR027417;	Small GTP-binding protein domain; P-loop containing nucleoside triphosphate hydrolase;
Q99615	DnaJ homolog subfamily C member 7 OS=Homo sapiens OX=9606 GN=DNAJC7 PE=1 SV=2	0.539	Down	0.046555	DNAJC7	56.44	1.934	1.068	1.599	1.66	2.705	1.445	1.049	1.03	0.961	0.349	cytoplasm	GO:0050794 regulation of cellular process; GO:0061077 chaperone-mediated protein folding; GO:0080134 regulation of response to stress; GO:0043085 positive regulation of catalytic activity; GO:0006457 protein folding; GO:0070389 chaperone cofactor-dependent protein refolding; GO:0050789 regulation of biological process; GO:0080135 regulation of cellular response to stress; GO:0051336 regulation of…	GO:0043229 intracellular organelle; GO:0016020 membrane; GO:0044421 extracellular region part; GO:0043232 intracellular non-membrane-bounded organelle; GO:0005737 cytoplasm; GO:0044446 intracellular organelle part; GO:0031982 vesicle; GO:0031981 nuclear lumen; GO:0044424 intracellular part; GO:0005829 cytosol; GO:0005623 cell; GO:0005576 extracellular region; GO:0044422 organelle part; GO:0043228…	GO:0001671 ATPase activator activity; GO:0031072 heat shock protein binding; GO:0030234 enzyme regulator activity; GO:0005488 binding; GO:0060589 nucleoside-triphosphatase regulator activity; GO:0005515 protein binding; GO:0060590 ATPase regulator activity; GO:0098772 molecular function regulator; GO:0008047 enzyme activator activity;	K09527	DNAJC7; DnaJ homolog subfamily C member 7		IPR011990; IPR001623; IPR013026;	Tetratricopeptide-like helical domain; DnaJ domain; Tetratricopeptide repeat-containing domain;
Q15283	Ras GTPase-activating protein 2 OS=Homo sapiens OX=9606 GN=RASA2 PE=1 SV=3	0.271	Down	0.0053378	RASA2	96.613	1.385	2.343	2.673			0.722	0.509	0.501			cytoplasm	GO:0044700 single organism signaling; GO:0050794 regulation of cellular process; GO:0016310 phosphorylation; GO:0009968 negative regulation of signal transduction; GO:0023051 regulation of signaling; GO:0044267 cellular protein metabolic process; GO:0044699 single-organism process; GO:0046578 regulation of Ras protein signal transduction; GO:0048519 negative regulation of biological process; GO:0…	GO:0016020 membrane; GO:0031226 intrinsic component of plasma membrane; GO:0071944 cell periphery; GO:0005737 cytoplasm; GO:0031224 intrinsic component of membrane; GO:0044424 intracellular part; GO:0005829 cytosol; GO:0005623 cell; GO:0009898 cytoplasmic side of plasma membrane; GO:0098562 cytoplasmic side of membrane; GO:0005886 plasma membrane; GO:0044459 plasma membrane part; GO:0005622 intra…	GO:0030234 enzyme regulator activity; GO:0060589 nucleoside-triphosphatase regulator activity; GO:0005488 binding; GO:0030695 GTPase regulator activity; GO:0043167 ion binding; GO:0043169 cation binding; GO:0046872 metal ion binding; GO:0005515 protein binding; GO:0098772 molecular function regulator; GO:0008047 enzyme activator activity; GO:0005096 GTPase activator activity;	K08053	RASA2, GAP1M; Ras GTPase-activating protein 2	hsa04010 MAPK signaling pathway; hsa04014 Ras signaling pathway; hsa05203 Viral carcinogenesis	IPR001936; IPR011993; IPR008936; IPR000008; IPR001849;	Ras GTPase-activating protein; PH domain-like; Rho GTPase activation protein; C2 domain; Pleckstrin homology domain;
Q15185	Prostaglandin E synthase 3 OS=Homo sapiens OX=9606 GN=PTGES3 PE=1 SV=1	3.941	Up	0.013176	PTGES3	18.697				0.39	0.327				1.228	1.598	nucleus	GO:0044700 single organism signaling; GO:0044085 cellular component biogenesis; GO:0022613 ribonucleoprotein complex biogenesis; GO:0065008 regulation of biological quality; GO:0022618 ribonucleoprotein complex assembly; GO:0051973 positive regulation of telomerase activity; GO:0009891 positive regulation of biosynthetic process; GO:0044255 cellular lipid metabolic process; GO:0044237 cellular me…	GO:0044421 extracellular region part; GO:0000781 chromosome, telomeric region; GO:0031982 vesicle; GO:0005737 cytoplasm; GO:0032991 macromolecular complex; GO:0044424 intracellular part; GO:0005623 cell; GO:0044422 organelle part; GO:0044427 chromosomal part; GO:0043228 non-membrane-bounded organelle; GO:0031974 membrane-enclosed lumen; GO:0070062 extracellular exosome; GO:0005654 nucleoplasm; GO…	GO:0031072 heat shock protein binding; GO:0070182 DNA polymerase binding; GO:0003720 telomerase activity; GO:0003964 RNA-directed DNA polymerase activity; GO:0051879 Hsp90 protein binding; GO:0005515 protein binding; GO:0016853 isomerase activity; GO:0016779 nucleotidyltransferase activity; GO:0003824 catalytic activity; GO:0005488 binding; GO:0034061 DNA polymerase activity; GO:0051082 unfolded …	K15730	PTGES3; cytosolic prostaglandin-E synthase [EC:5.3.99.3]	hsa00590 Arachidonic acid metabolism; hsa01100 Metabolic pathways	IPR007052; IPR008978;	CS domain; HSP20-like chaperone;
O60291	E3 ubiquitin-protein ligase MGRN1 OS=Homo sapiens OX=9606 GN=MGRN1 PE=1 SV=2	0.576	Down	0.00190448	MGRN1	60.752	1.966	1.791	2.182			1.239	1.14	1.042			nucleus	GO:0050794 regulation of cellular process; GO:0046907 intracellular transport; GO:0043949 regulation of cAMP-mediated signaling; GO:0009968 negative regulation of signal transduction; GO:0023051 regulation of signaling; GO:0044267 cellular protein metabolic process; GO:0048519 negative regulation of biological process; GO:0048523 negative regulation of cellular process; GO:0044237 cellular metabo…	GO:0097708 intracellular vesicle; GO:0043229 intracellular organelle; GO:0016020 membrane; GO:0044421 extracellular region part; GO:0031410 cytoplasmic vesicle; GO:0071944 cell periphery; GO:0031982 vesicle; GO:0005737 cytoplasm; GO:0012505 endomembrane system; GO:0044424 intracellular part; GO:0005623 cell; GO:0005829 cytosol; GO:0005576 extracellular region; GO:0005886 plasma membrane; GO:00057…	GO:0061630 ubiquitin protein ligase activity; GO:0019787 ubiquitin-like protein transferase activity; GO:0046914 transition metal ion binding; GO:0003824 catalytic activity; GO:0005488 binding; GO:0004842 ubiquitin-protein transferase activity; GO:0043167 ion binding; GO:0046872 metal ion binding; GO:0043169 cation binding; GO:0005515 protein binding; GO:0061659 ubiquitin-like protein ligase acti…	K10604	MGRN1; E3 ubiquitin-protein ligase MGRN1 [EC:2.3.2.27]	hsa04120 Ubiquitin mediated proteolysis; hsa04340 Hedgehog signaling pathway	IPR001841; IPR013083;	Zinc finger, RING-type; Zinc finger, RING/FYVE/PHD-type;
Q92900	Regulator of nonsense transcripts 1 OS=Homo sapiens OX=9606 GN=UPF1 PE=1 SV=2	0.069	Down	0.00164375	UPF1	124.34				3.659	2.967				0.221	0.234	cytoplasm	GO:0050658 RNA transport; GO:0065008 regulation of biological quality; GO:0010608 posttranscriptional regulation of gene expression; GO:0051169 nuclear transport; GO:0070555 response to interleukin-1; GO:0071345 cellular response to cytokine stimulus; GO:0044237 cellular metabolic process; GO:0015031 protein transport; GO:0009607 response to biotic stimulus; GO:0009605 response to external stimul…	GO:0000784 nuclear chromosome, telomeric region; GO:0000781 chromosome, telomeric region; GO:0000932 P-body; GO:0005737 cytoplasm; GO:0032991 macromolecular complex; GO:0044424 intracellular part; GO:0005623 cell; GO:0036464 cytoplasmic ribonucleoprotein granule; GO:0044422 organelle part; GO:0044427 chromosomal part; GO:0043228 non-membrane-bounded organelle; GO:0031974 membrane-enclosed lumen; …	GO:1901265 nucleoside phosphate binding; GO:0008026 ATP-dependent helicase activity; GO:0016817 hydrolase activity, acting on acid anhydrides; GO:0042162 telomeric DNA binding; GO:0016787 hydrolase activity; GO:0005515 protein binding; GO:0003682 chromatin binding; GO:0016887 ATPase activity; GO:1901363 heterocyclic compound binding; GO:0097159 organic cyclic compound binding; GO:0016462 pyrophos…	K14326	UPF1, RENT1; regulator of nonsense transcripts 1 [EC:3.6.4.-]	hsa03013 RNA transport; hsa03015 mRNA surveillance pathway	IPR006935; IPR027417; IPR018999;	Helicase/UvrB, N-terminal; P-loop containing nucleoside triphosphate hydrolase; RNA helicase UPF1, UPF2-interacting domain;
O00754	Lysosomal alpha-mannosidase OS=Homo sapiens OX=9606 GN=MAN2B1 PE=1 SV=3	1.733	Up	0.034337	MAN2B1	113.74				0.866	0.705				1.329	1.394	extracellular	GO:0045321 leukocyte activation; GO:0002283 neutrophil activation involved in immune response; GO:0002252 immune effector process; GO:0006517 protein deglycosylation; GO:0009313 oligosaccharide catabolic process; GO:0044267 cellular protein metabolic process; GO:0006013 mannose metabolic process; GO:0044699 single-organism process; GO:0050896 response to stimulus; GO:0044237 cellular metabolic pr…	GO:0034774 secretory granule lumen; GO:0005615 extracellular space; GO:0044421 extracellular region part; GO:0031410 cytoplasmic vesicle; GO:0005737 cytoplasm; GO:0031982 vesicle; GO:0044433 cytoplasmic vesicle part; GO:0044424 intracellular part; GO:0035578 azurophil granule lumen; GO:0005623 cell; GO:0044422 organelle part; GO:0005775 vacuolar lumen; GO:0070062 extracellular exosome; GO:0031974…	GO:0015923 mannosidase activity; GO:0046914 transition metal ion binding; GO:0003824 catalytic activity; GO:0005488 binding; GO:0043167 ion binding; GO:0004559 alpha-mannosidase activity; GO:0016798 hydrolase activity, acting on glycosyl bonds; GO:0030246 carbohydrate binding; GO:0043169 cation binding; GO:0004553 hydrolase activity, hydrolyzing O-glycosyl compounds; GO:0046872 metal ion binding;…	K12311	MAN2B1, LAMAN; lysosomal alpha-mannosidase [EC:3.2.1.24]	hsa00511 Other glycan degradation; hsa04142 Lysosome	IPR027291; IPR028995; IPR011682; IPR015341; IPR000602; IPR011013; IPR011330; IPR013780;	Glycoside hydrolase 38/57, N-terminal domain; Glycoside hydrolase families 57/38, central domain; Glycosyl hydrolase family 38, C-terminal; Glycoside hydrolase family 38, central domain; Glycoside hydrolase family 38, N-terminal domain; Galactose mutarotase-like domain; Glycoside hydrolase/deacetylase, beta/alpha-barrel; Glycosyl hydrolase, all-beta;
Q05469	Hormone-sensitive lipase OS=Homo sapiens OX=9606 GN=LIPE PE=1 SV=4	5.989	Up	0.020263	LIPE	116.6	0.118	0.317	0.118			0.68	1.935	0.697			nucleus	GO:0016310 phosphorylation; GO:0046486 glycerolipid metabolic process; GO:1901615 organic hydroxy compound metabolic process; GO:1902652 secondary alcohol metabolic process; GO:0006066 alcohol metabolic process; GO:0044267 cellular protein metabolic process; GO:0044699 single-organism process; GO:0044255 cellular lipid metabolic process; GO:0016125 sterol metabolic process; GO:0044237 cellular me…	GO:0043229 intracellular organelle; GO:0016020 membrane; GO:0043232 intracellular non-membrane-bounded organelle; GO:0098857 membrane microdomain; GO:0071944 cell periphery; GO:0005737 cytoplasm; GO:0005901 caveola; GO:0044424 intracellular part; GO:0005829 cytosol; GO:0005623 cell; GO:0005886 plasma membrane; GO:0043228 non-membrane-bounded organelle; GO:0043226 organelle; GO:0044459 plasma memb…	GO:0033878 hormone-sensitive lipase activity; GO:0052689 carboxylic ester hydrolase activity; GO:0003824 catalytic activity; GO:0005488 binding; GO:0019901 protein kinase binding; GO:0016788 hydrolase activity, acting on ester bonds; GO:0016787 hydrolase activity; GO:0005515 protein binding; GO:0004806 triglyceride lipase activity; GO:0016298 lipase activity; GO:0019900 kinase binding; GO:0019899…	K07188	LIPE, HSL; hormone-sensitive lipase [EC:3.1.1.79]	hsa04024 cAMP signaling pathway; hsa04152 AMPK signaling pathway; hsa04371 Apelin signaling pathway; hsa04714 Thermogenesis; hsa04910 Insulin signaling pathway; hsa04923 Regulation of lipolysis in adipocytes; hsa04925 Aldosterone synthesis and secretion	IPR010468; IPR029058; IPR013094;	Hormone-sensitive lipase, N-terminal; Alpha/Beta hydrolase fold; Alpha/beta hydrolase fold-3;
VUR, vesicoureteral reflux.
